# Supplementary material for: The versatility of non-heme diiron monooxygenase PmlABCDEF: a single biocatalyst for a plethora of oxygenation reactions
Source: Royal Society of Chemistry journal article supplement (doi:10.1039/d2cy01167k), 2022-01-01
Supplement: d2cy01167k1.pdf [file d2cy01167k1.pdf]

**The versatility of non-heme diiron monooxygenase PmlABCDEF:  
a single biocatalyst for a plethora of oxygenation reactions**

**Supporting information**

Vytautas Petkevičius<sup>a</sup>, Justas Vaitekūnas<sup>a</sup>, Mikas Sadauskas<sup>a</sup>, Fabian Josef Peter Schultes<sup>b</sup>, Dirk Tischler<sup>b</sup>, Rolandas Meškys<sup>a</sup>

<sup>a</sup>*Department of Molecular Microbiology and Biotechnology, Institute of Biochemistry, Life Sciences Center, Vilnius University, Saulėtekio 7, Vilnius, LT-10257, Lithuania*

<sup>b</sup>*Microbial Biotechnology, Ruhr University Bochum, Universitätsstr. 150, 44780 Bochum, Germany*

*For correspondence. E-mail vytautas.petkevicius@bchi.vu.lt; Tel. +37067979857*

**Contents**

|                                                                            |    |
|----------------------------------------------------------------------------|----|
| General Remarks .....                                                      | 2  |
| HPLC-MS chromatograms of indigoid compounds .....                          | 3  |
| HPLC-MS chromatograms of <i>N</i> -oxides, catechols, and sulfoxides ..... | 10 |
| Chromatograms of chiral HPLC analysis .....                                | 24 |
| Chromatograms of chiral GC analysis .....                                  | 28 |
| Chromatograms of GC-MS analysis .....                                      | 31 |
| NMR spectra of synthesized compounds .....                                 | 39 |
| TLC analysis of regioselective <i>N</i> -oxide synthesis .....             | 43 |

## General Remarks

NMR spectroscopy was performed on a Bruker Ascend 400. NMR spectra were recorded at ambient temperature using DMSO- $d_6$  and  $CDCl_3$  as solvents, with proton, and carbon resonances at 400 and 101 Mhz, respectively. All NMR data are reported in ppm relative to the solvent signal as the internal standard. The multiplicities are stated as follows: s = singlet, br s = broad singlet, d = doublet, dd = doublet of doublets, t = triplet, q = quartet, m = multiplet. Proton spectra were readjusted for presentation by removing solvent peaks.

All the HPLC-MS analyses were performed with a high-performance liquid chromatography system (Shimadzu, Japan) and a mass spectrometer (LCMS-2020, Shimadzu, Japan) equipped with an ESI source. The chromatographic separation was conducted using a YMC Pack Pro C18 column, 3 × 150 mm (YMC, Japan) at 40 °C and a mobile phase that consisted of 0.1% formic acid water solution (solvent A), and acetonitrile (solvent B) delivered in the 5 → 95% gradient elution mode. Mass scans were measured from m/z 50 up to m/z 700, at 350 °C interface temperature, 250 °C DL temperature, ±4,500 V interface voltage, neutral DL/Qarray, using  $N_2$  as nebulizing and drying gas. Mass spectrometry data were acquired in both the positive and negative ionization modes.

GC-MS analysis was performed with a Shimadzu Nexis GC\_2030 connected to a GCMS-QP2020 NX (Shimadzu, Japan) equipped with a FS-Supreme-5ms column (Ziemer, Germany).

Compounds subjected to NMR analysis were synthesized and purified according to the general biocatalysis procedures which were described in the main text.

## HPLC-MS chromatograms of indigoid compounds

The sample (0.5 mL) of the whole-cell biocatalysis reaction was transferred to a 1.5 ml tube and mixed with an equal part of chloroform. The mixture was intensively shaken followed by centrifugation (12000 *g* for 5 min), 0.1 ml of organic extract was combined with 0.4 mL of acetonitrile, and was analysed with HPLC-MS. Chromatograms were generated using a wavelength of 600 nm. Products featuring distinctive UV-Vis spectra and the proper  $m/z$   $[M+H]^+$  or  $m/z$   $[M-H]^-$  value were presented. Known compounds were designated by labelling the peak in a chromatogram with appropriate structural formula.

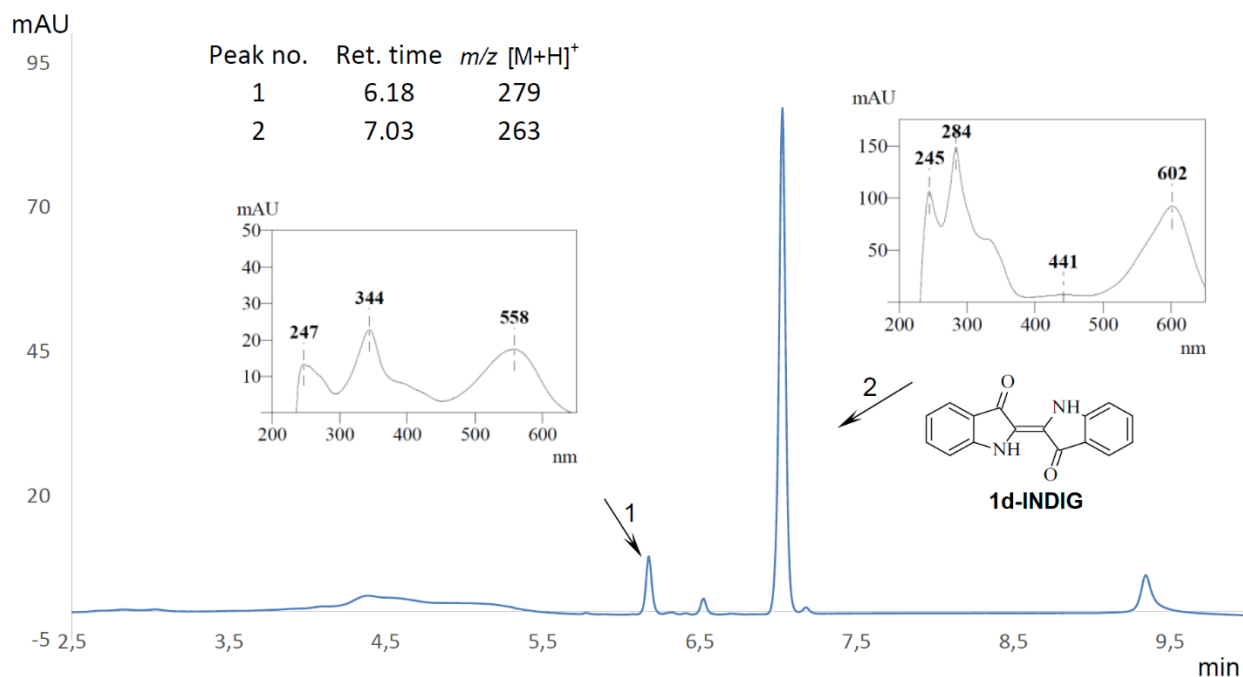

Products of indole (**1d**) conversion employing wild type PmlABCDEF.

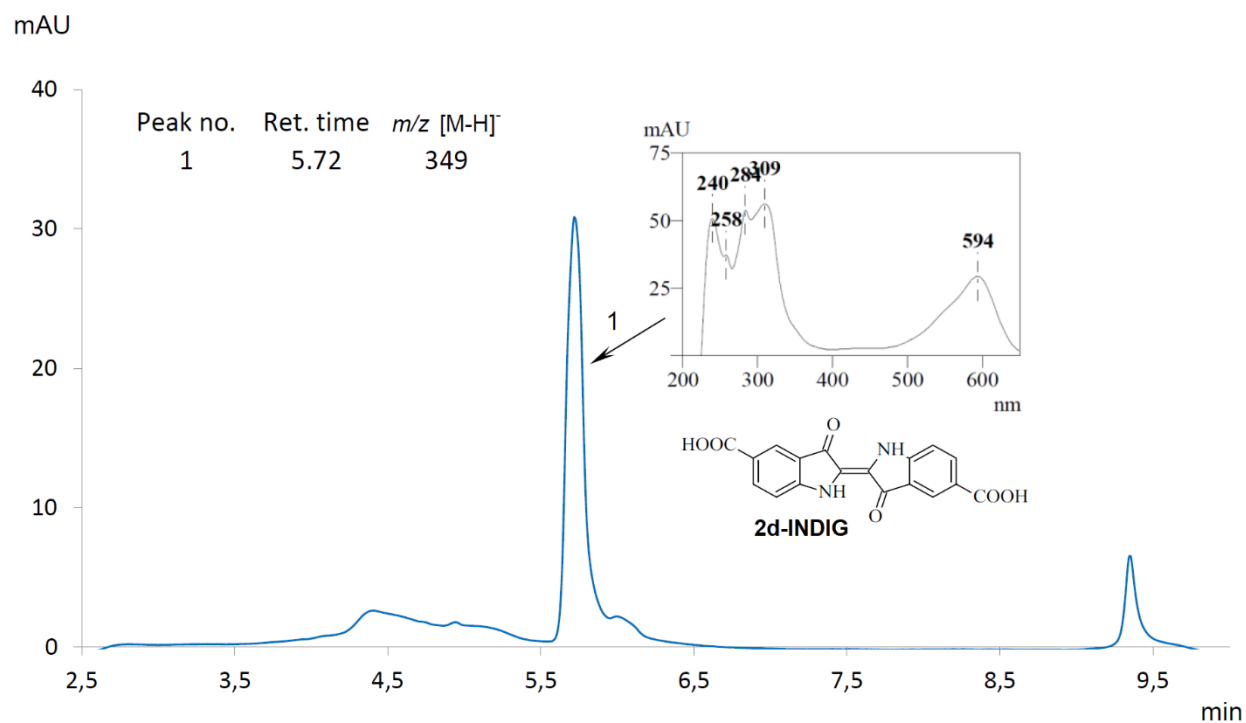

Products of indole-5-carboxylic acid (**2d**) conversion employing PmID G109Q mutant of PmIABCDEF.

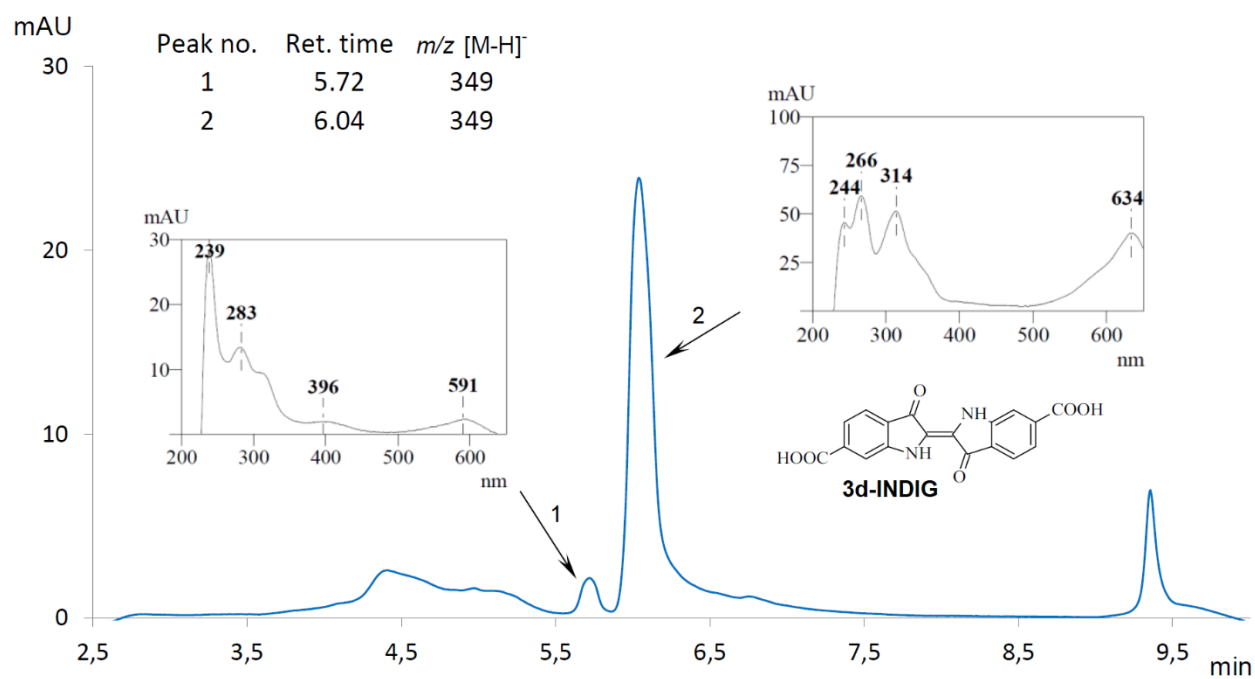

Products of indole-6-carboxylic acid (**3d**) conversion employing PmID G109Q mutant of PmIABCDEF.



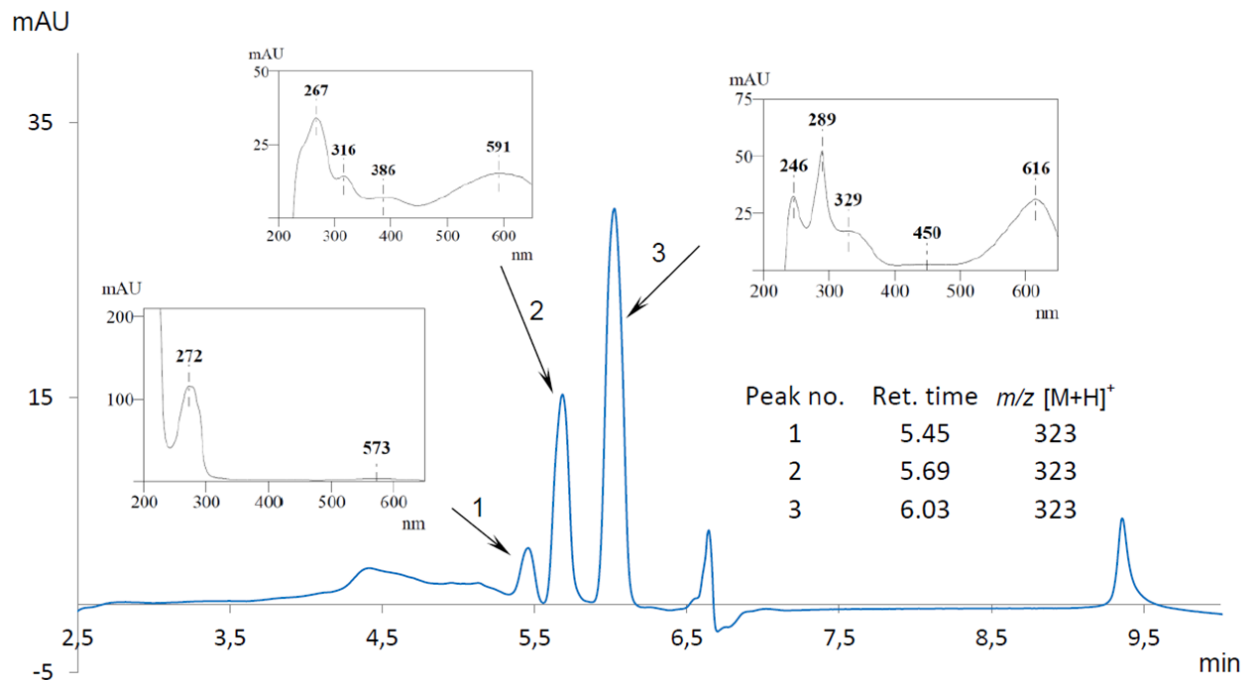

Products of indole-4-methanol (**4d**) conversion employing wild type PmlABCDEF.

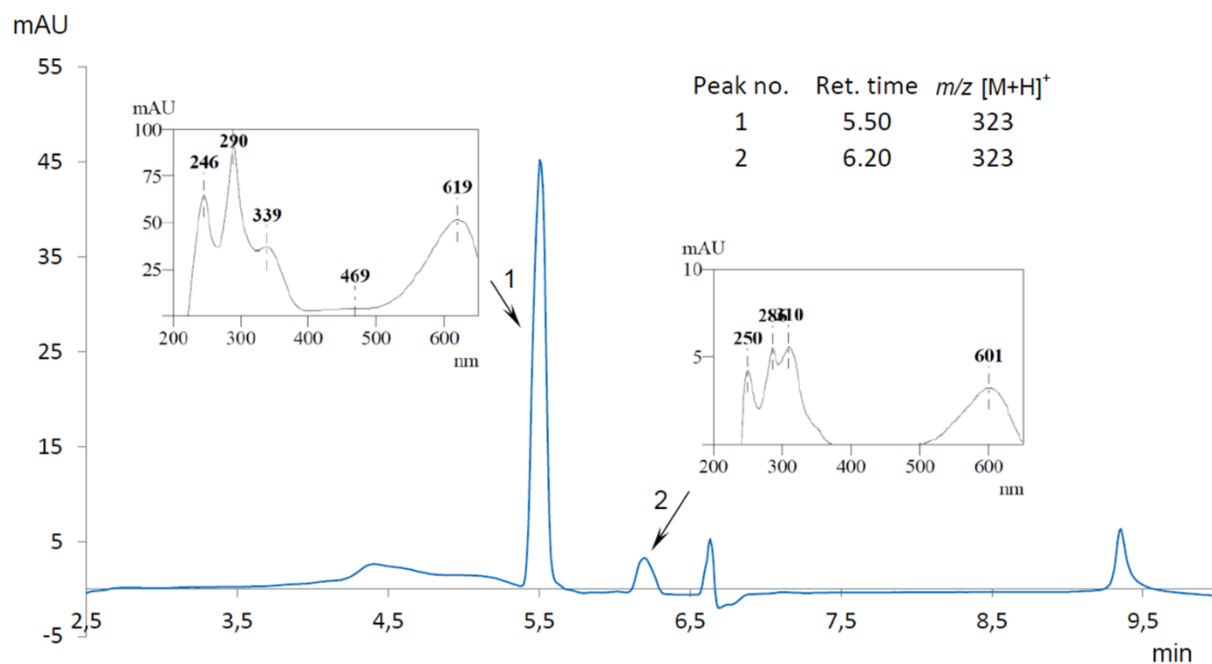

Products of indole-5-methanol (**5d**) conversion employing wild type PmlABCDEF.

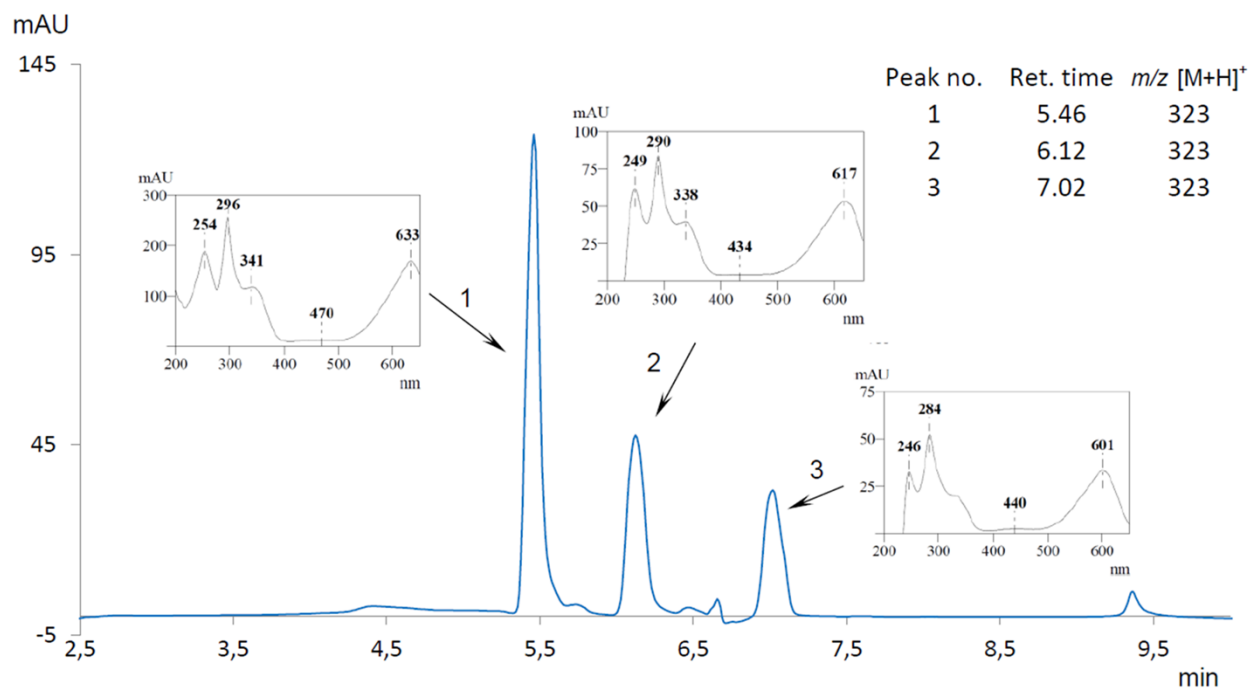

Products of indole-6-methanol (**6d**) conversion employing wild type PmIABCDEF.

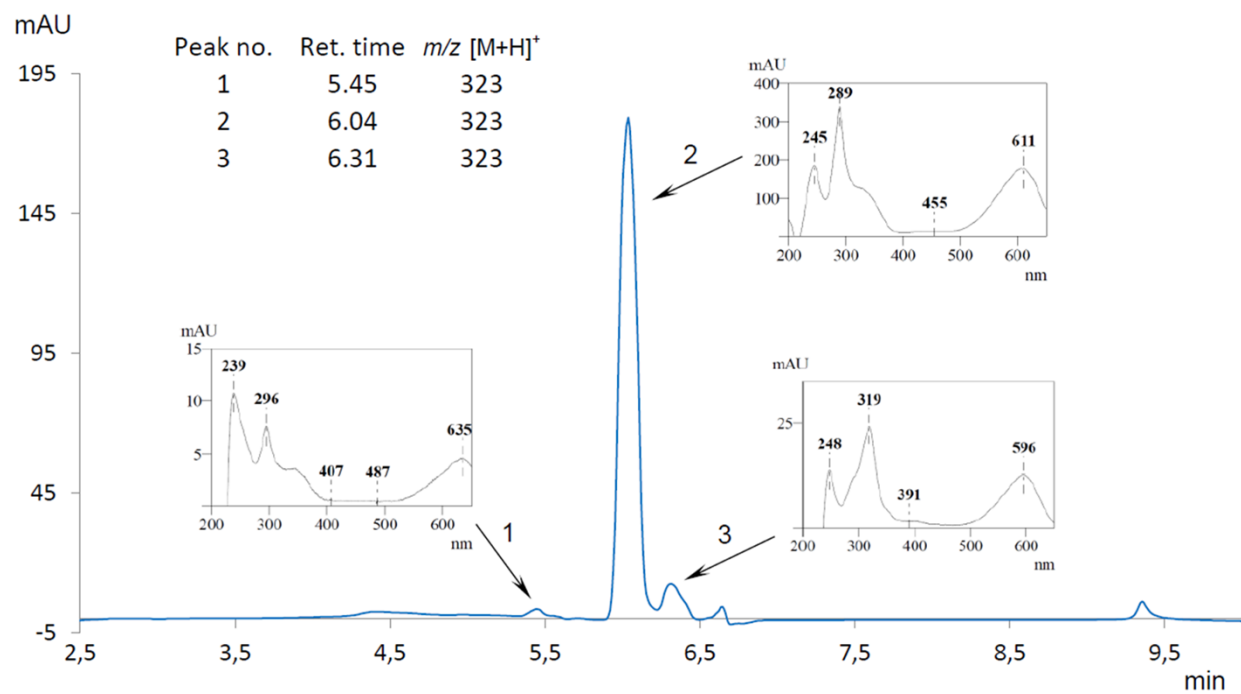

Products of indole-7-methanol (**7d**) conversion employing wild type PmIABCDEF.

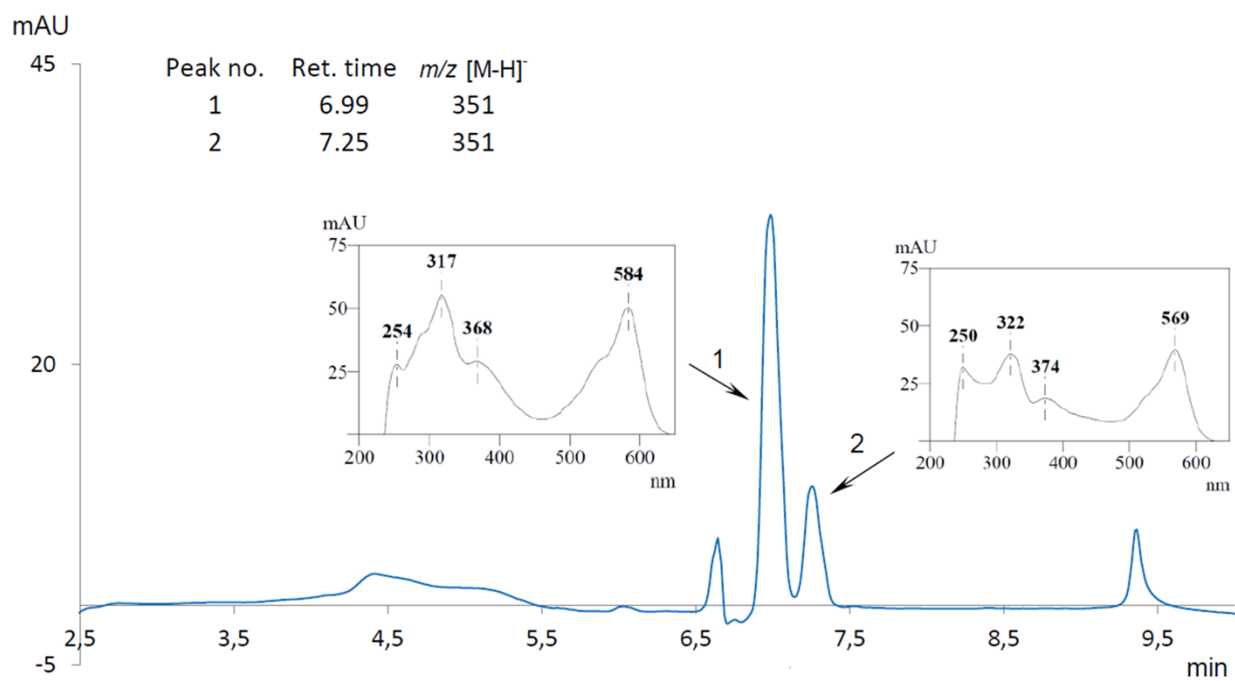

Products of 5-nitroindole (**8d**) conversion employing wild type PmlABCDEF.

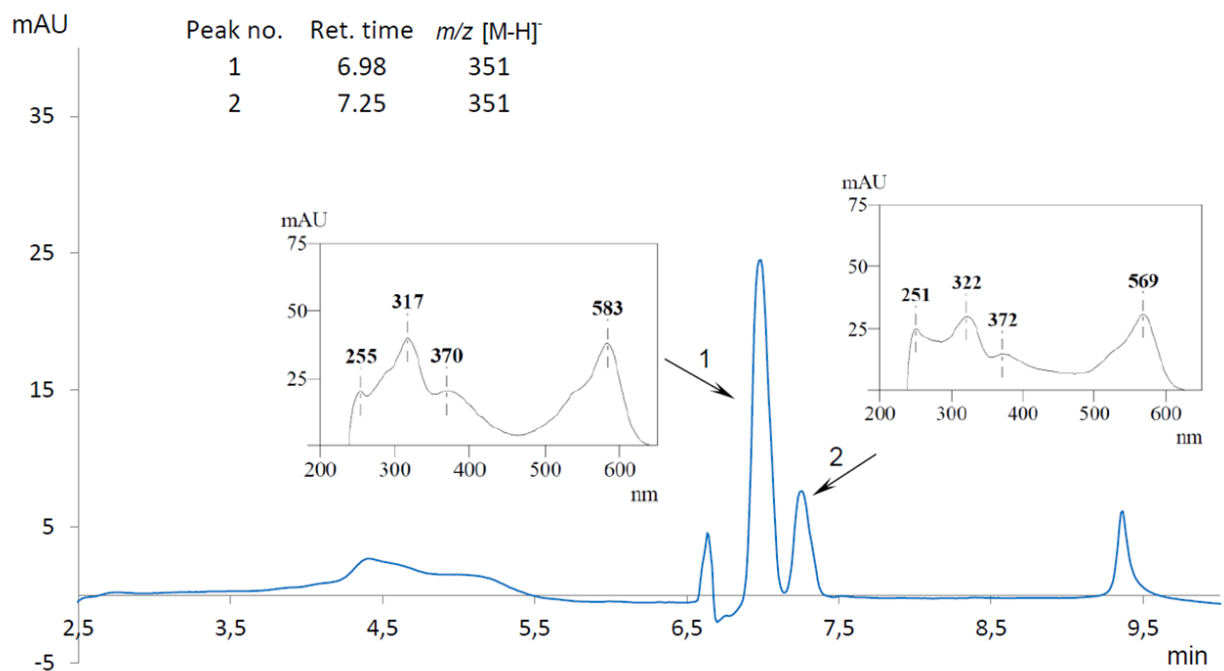

Products of 7-nitroindole (**9d**) conversion employing wild type PmlABCDEF.

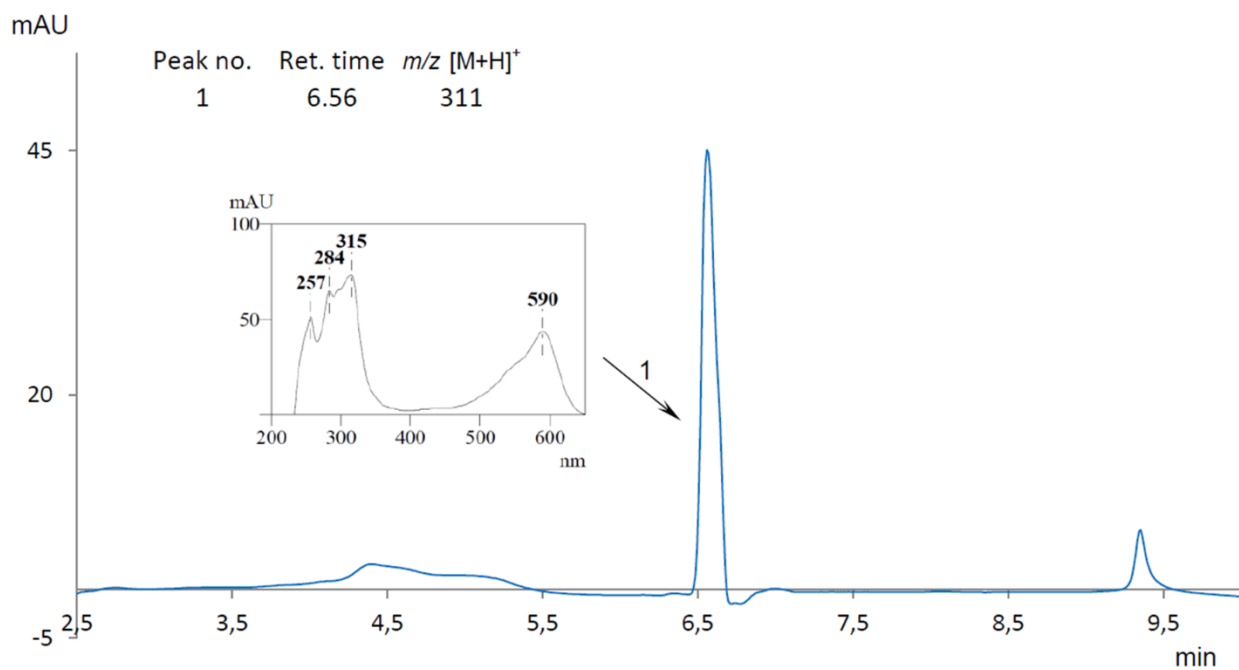

Products of indole-5-carbonitrile (**10d**) conversion employing wild type PmlABCDEF.

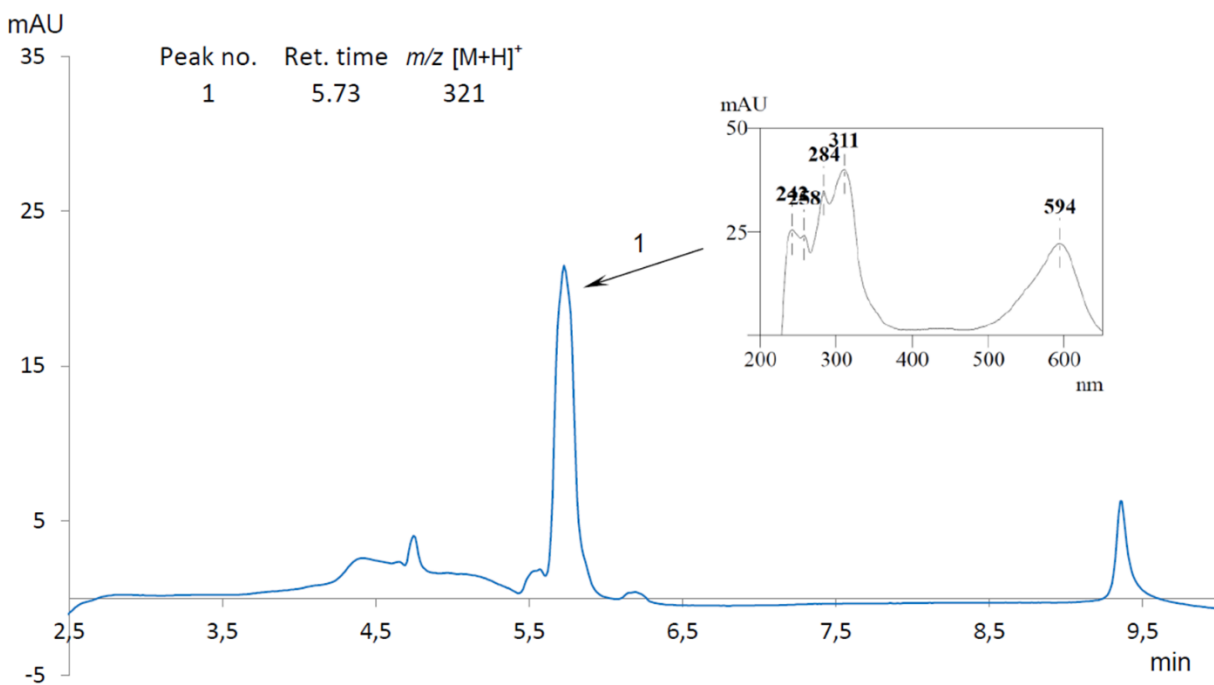

Products of indole-5-methanamine (**11d**) conversion employing wild type PmlABCDEF.

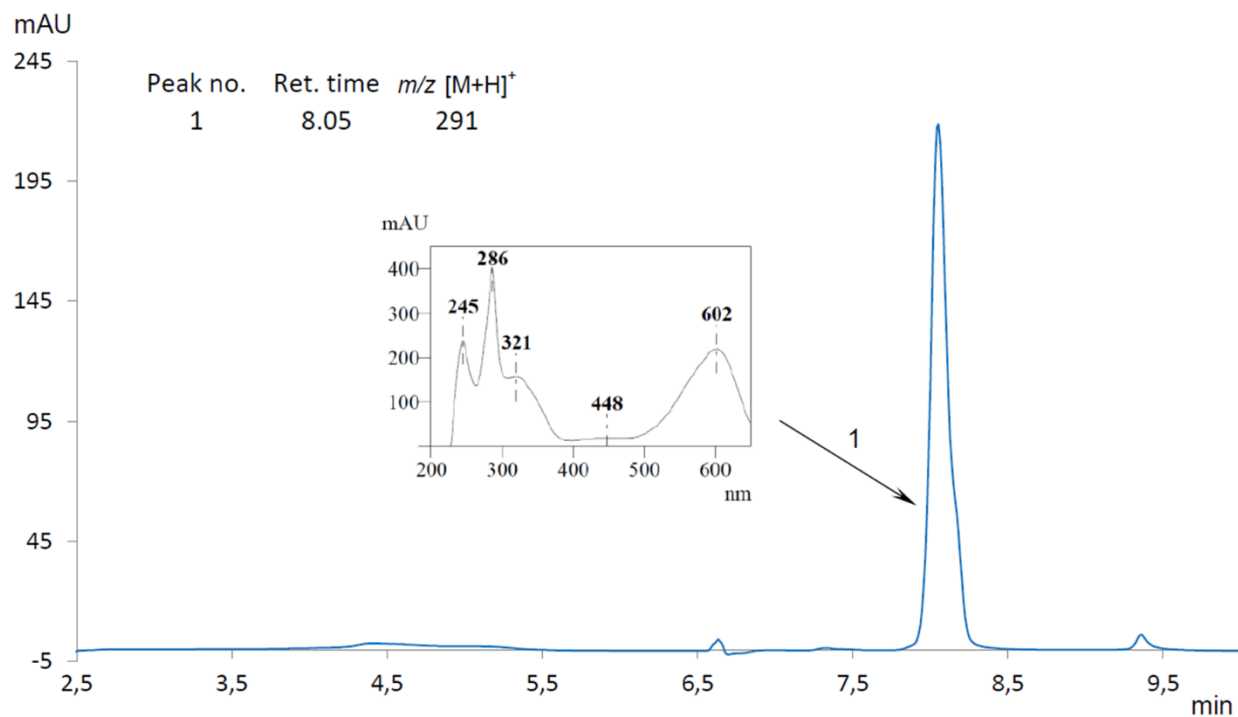

Products of 7-methylindole (**12d**) conversion employing wild type PmlABCDEF.

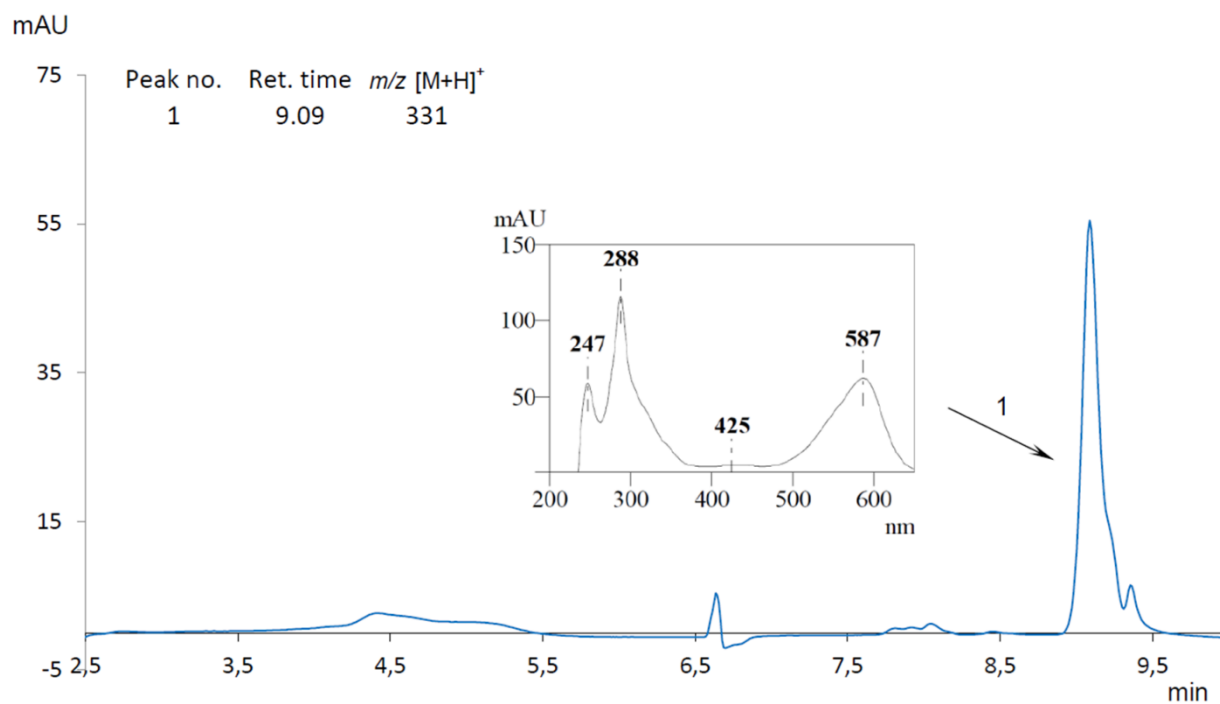

Products of 7-chloroindole (**13d**) conversion employing wild type PmlABCDEF.

## HPLC-MS chromatograms of *N*-oxides, catechols, and sulfoxides

The sample (0.5 mL) of the whole-cell biocatalysis reaction was transferred to a 1.5 mL tube and mixed with an equal part of acetonitrile. The mixture was intensively vortexed followed by centrifugation (12000 *g* for 5 min), an injection of supernatant was analysed with HPLC-MS. Stacked chromatograms were generated using wavelengths of 254 nm (*N*-oxides, sulfoxides) and 270 nm (catechols). Reactions with *P. putida* KT2440 whole cells producing Pml monooxygenase are indicated by the orange line, control reactions (substrate incubated with *P. putida* KT2440 cells without *pml* gene) are displayed in the green line. Blue and brown lines indicate the appropriate standard compound.

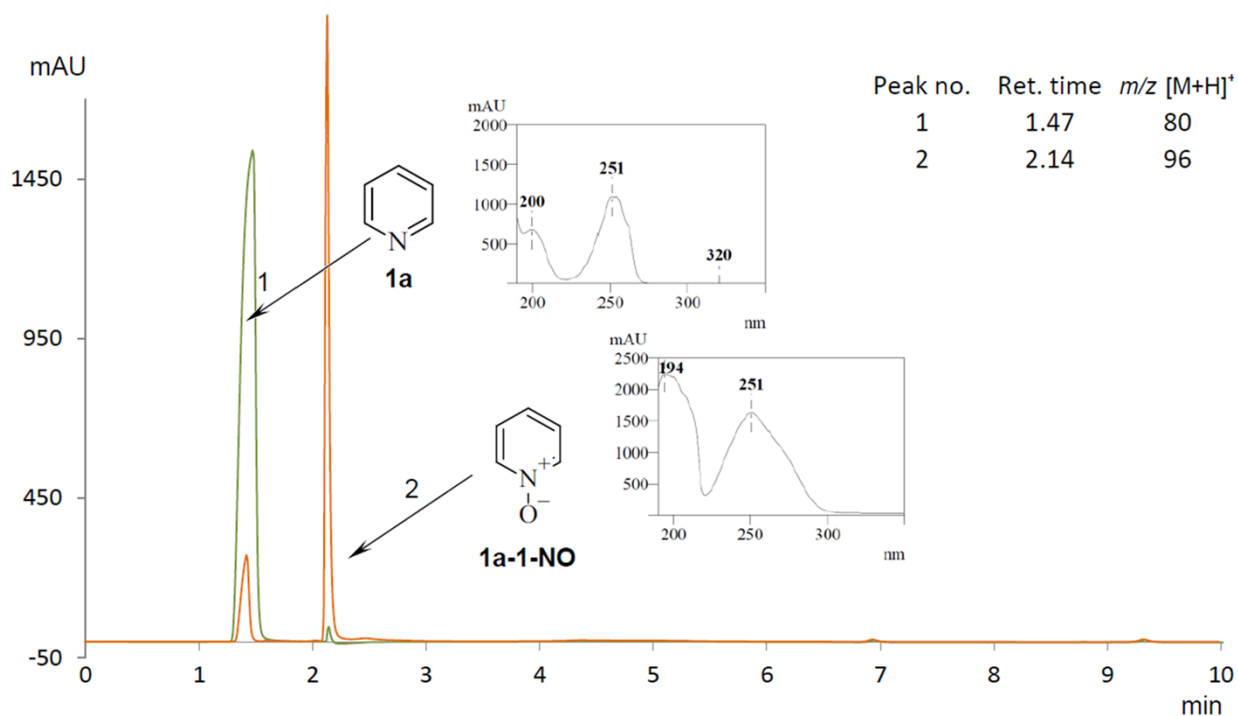

HPLC-MS analysis of pyridine (**1a**) conversion employing wild type PmlABCDEF.

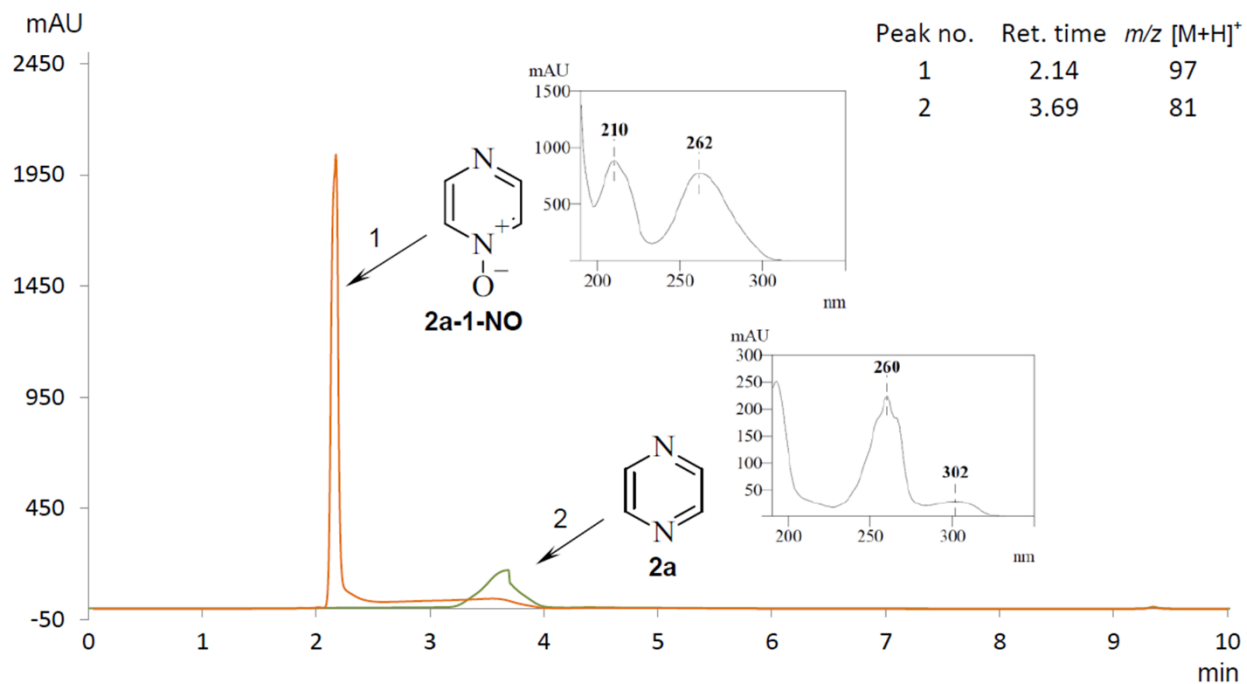

HPLC-MS analysis of pyrazine (**2a**) conversion employing wild type PmlABCDEF.

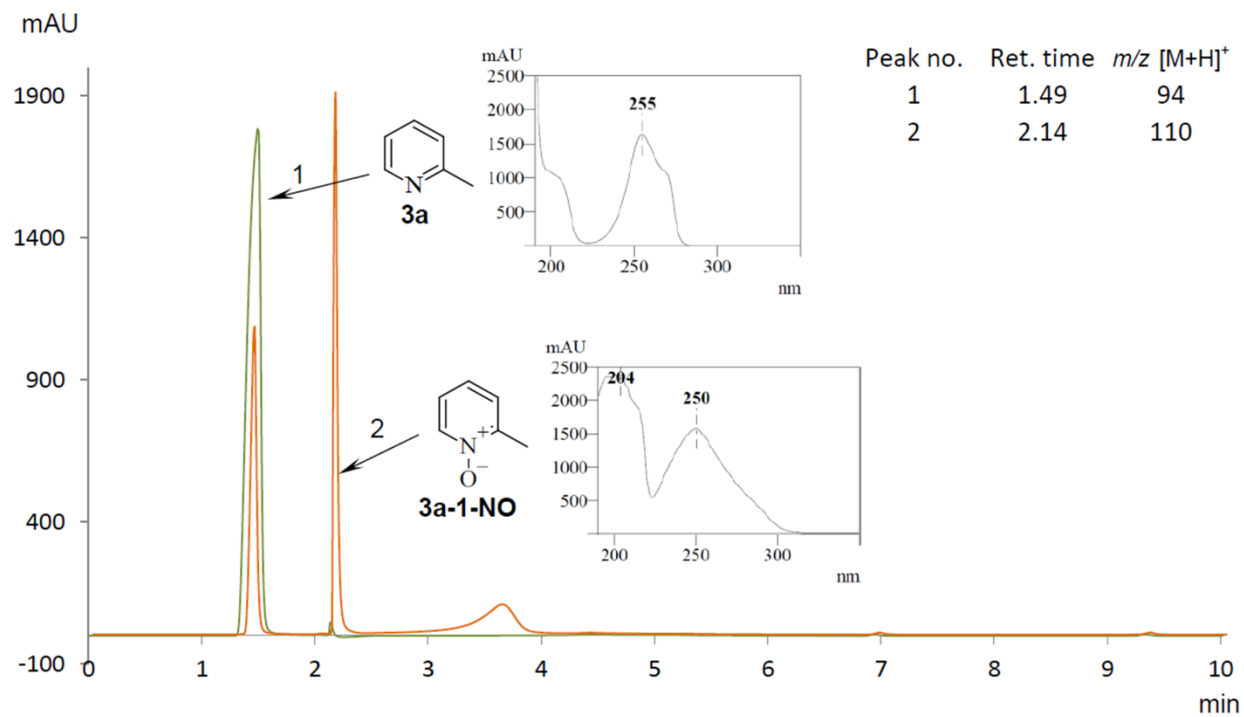

HPLC-MS analysis of 2-methylpyridine (**3a**) conversion employing wild type PmlABCDEF.

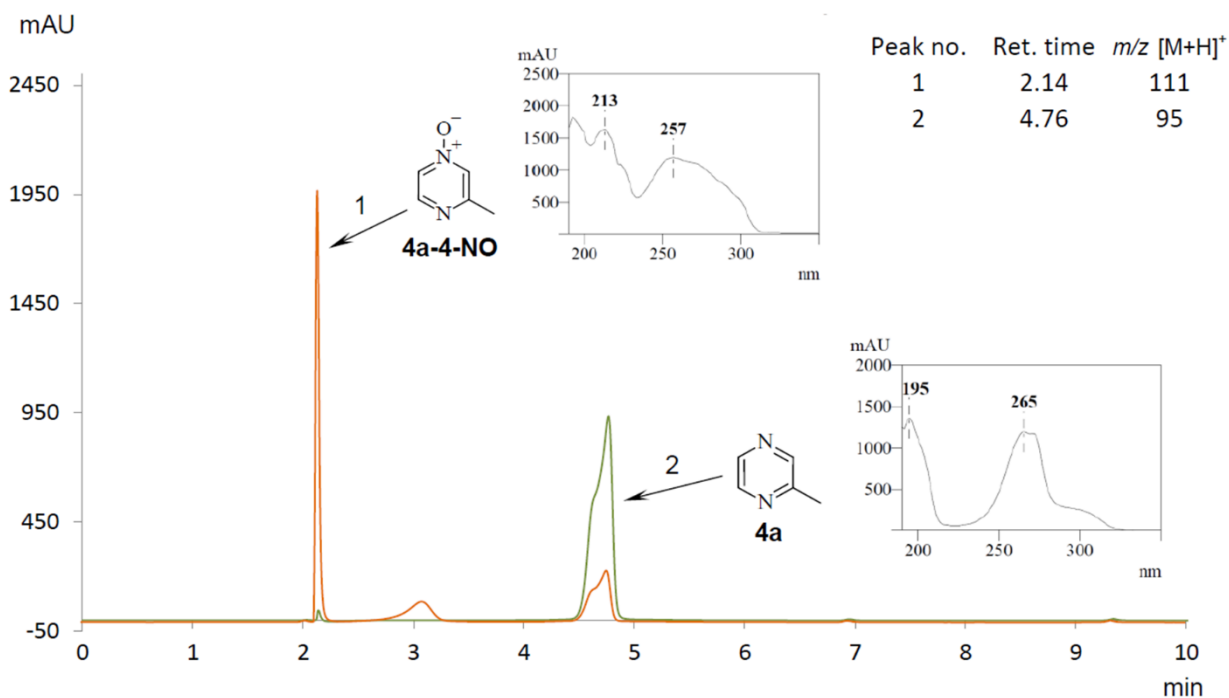

HPLC-MS analysis of 2-methylpyrazine (**4a**) conversion employing wild type PmlABCDEF.

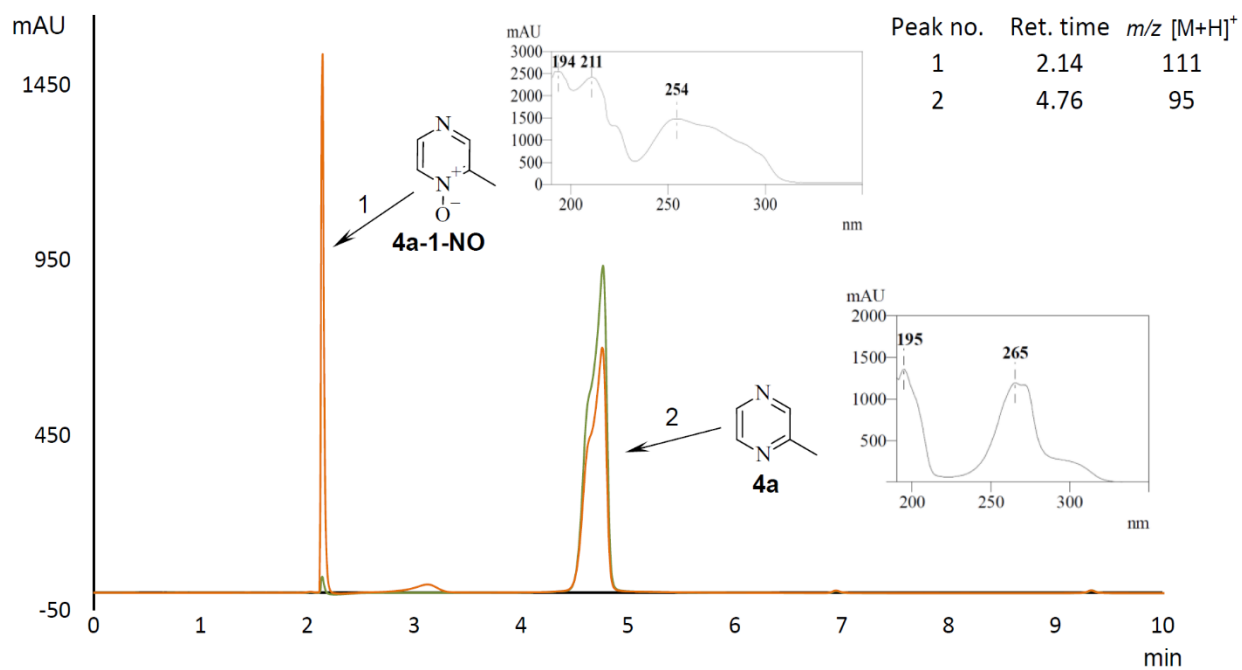

HPLC-MS analysis of 2-methylpyrazine (**4a**) conversion employing PmlID A113G mutant of PmlABCDEF.



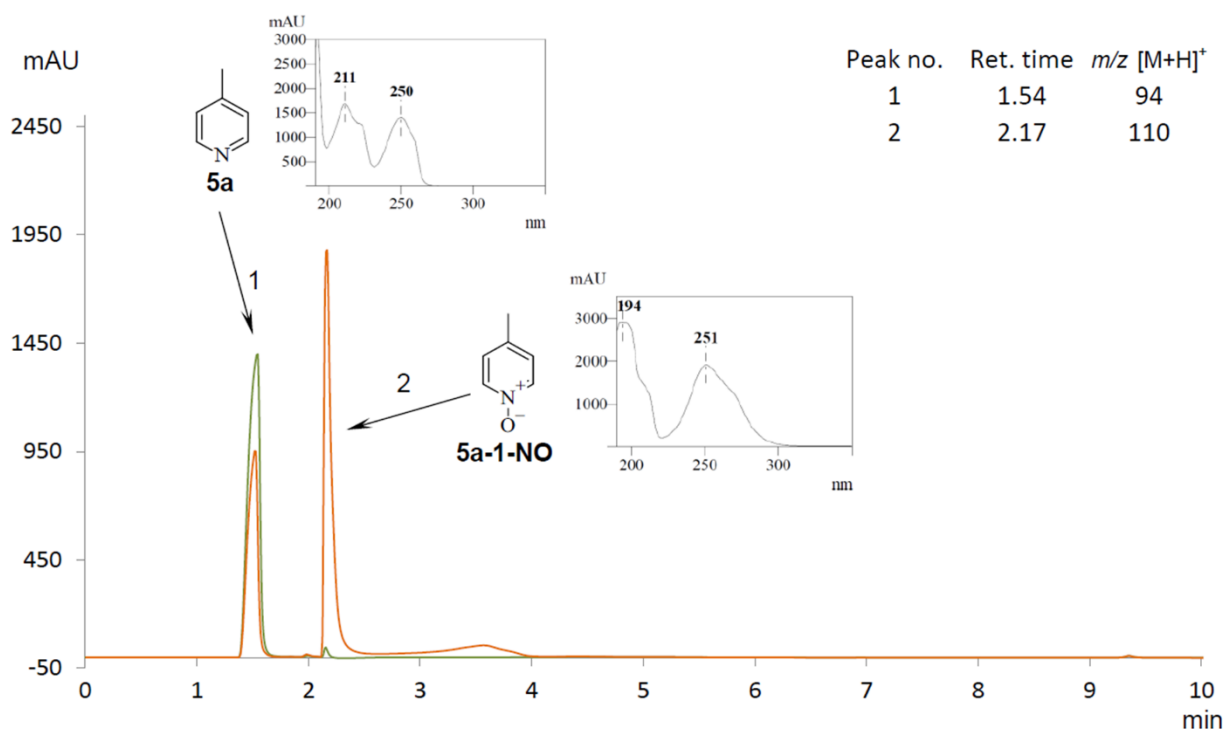

HPLC-MS analysis of 4-methylpyridine (**5a**) conversion employing wild type PmlABCDEF.

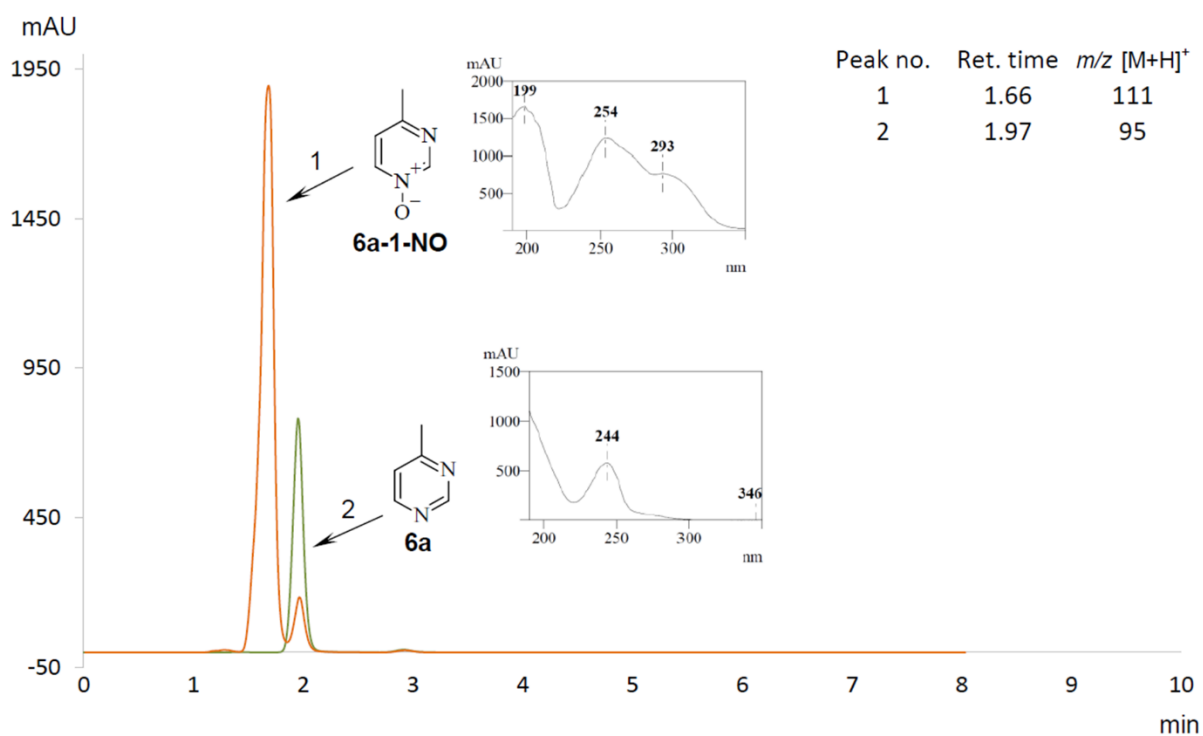

HPLC-MS analysis of 4-methylpyrimidine (**6a**) conversion employing wild type PmlABCDEF.

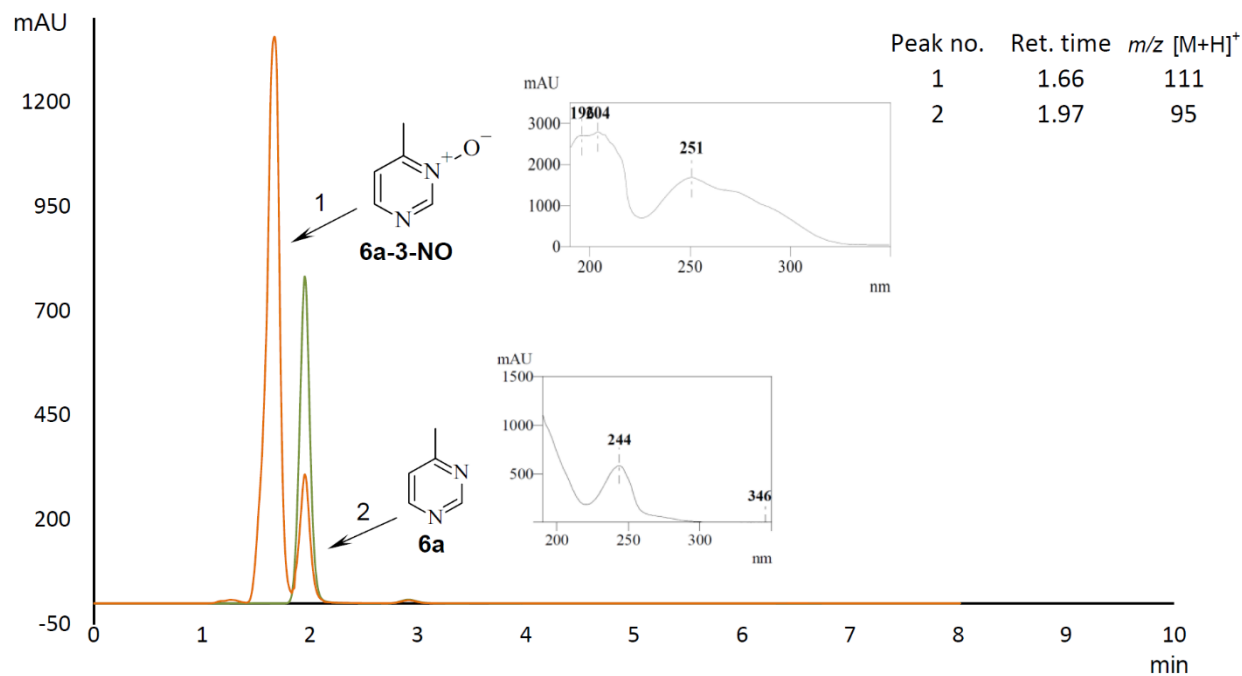

HPLC-MS analysis of 4-methylpyrimidine (**6a**) conversion employing PmlD A113G mutant of PmlABCDEF.

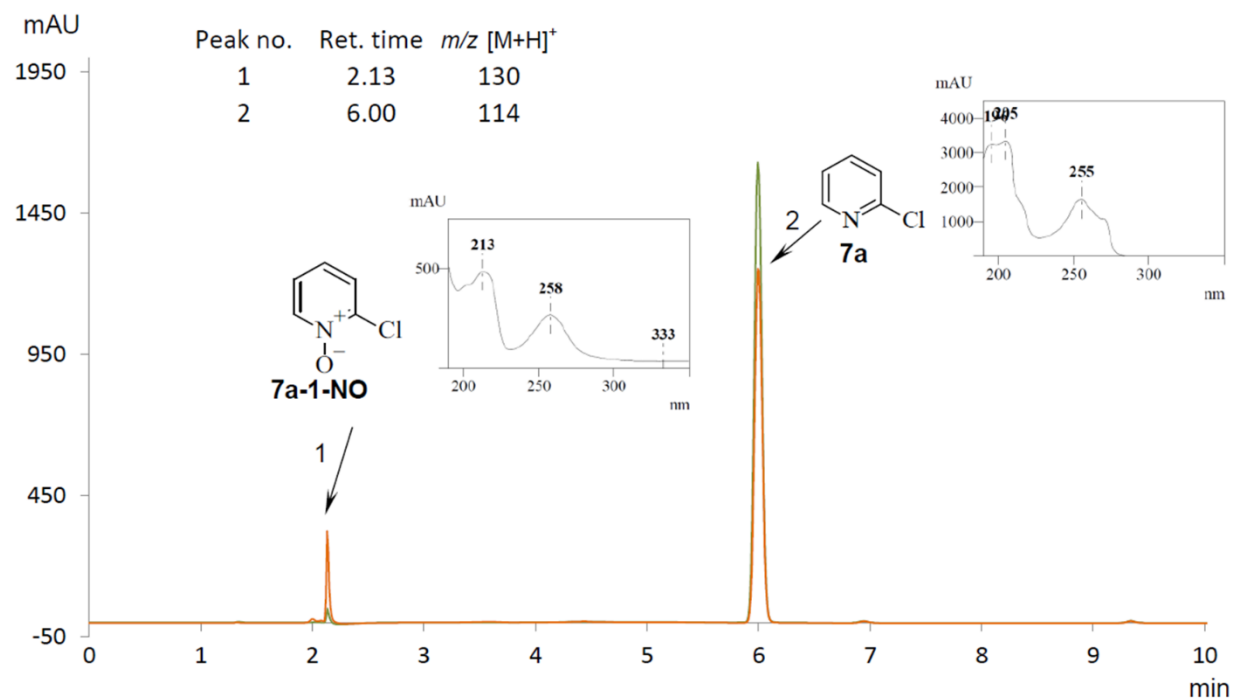

HPLC-MS analysis of 2-chloropyridine (**7a**) conversion employing wild type PmlABCDEF.

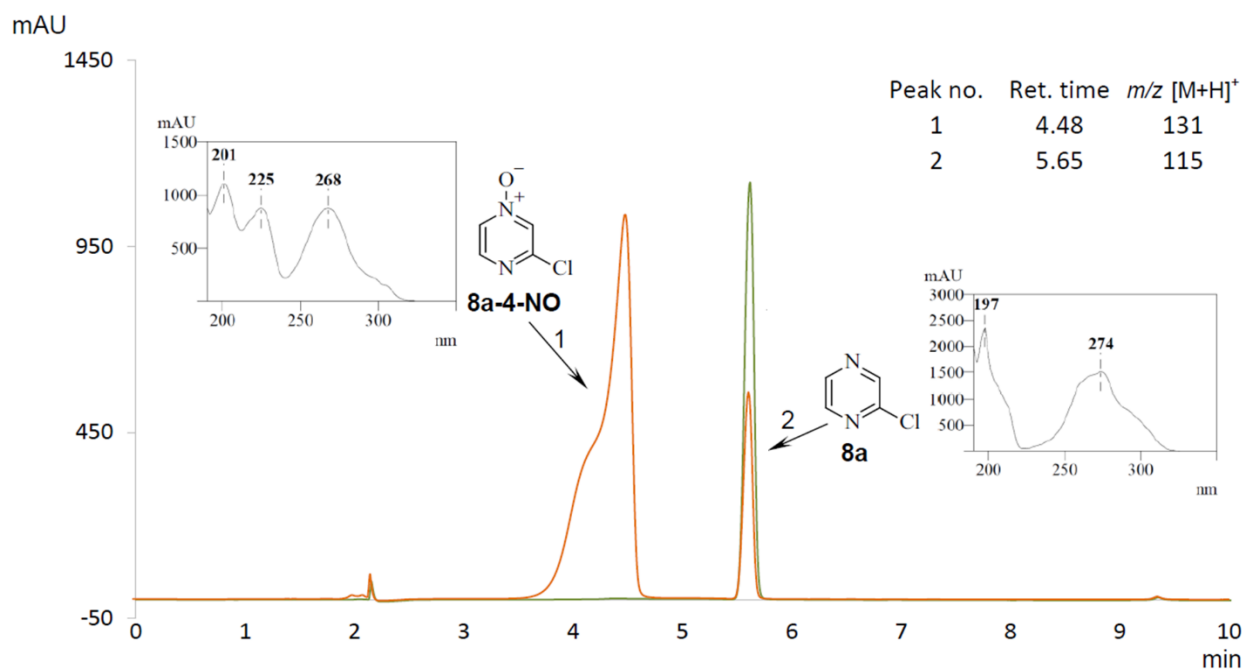

HPLC-MS analysis of 2-chloropyrazine (**8a**) conversion employing wild type PmlABCDEF.

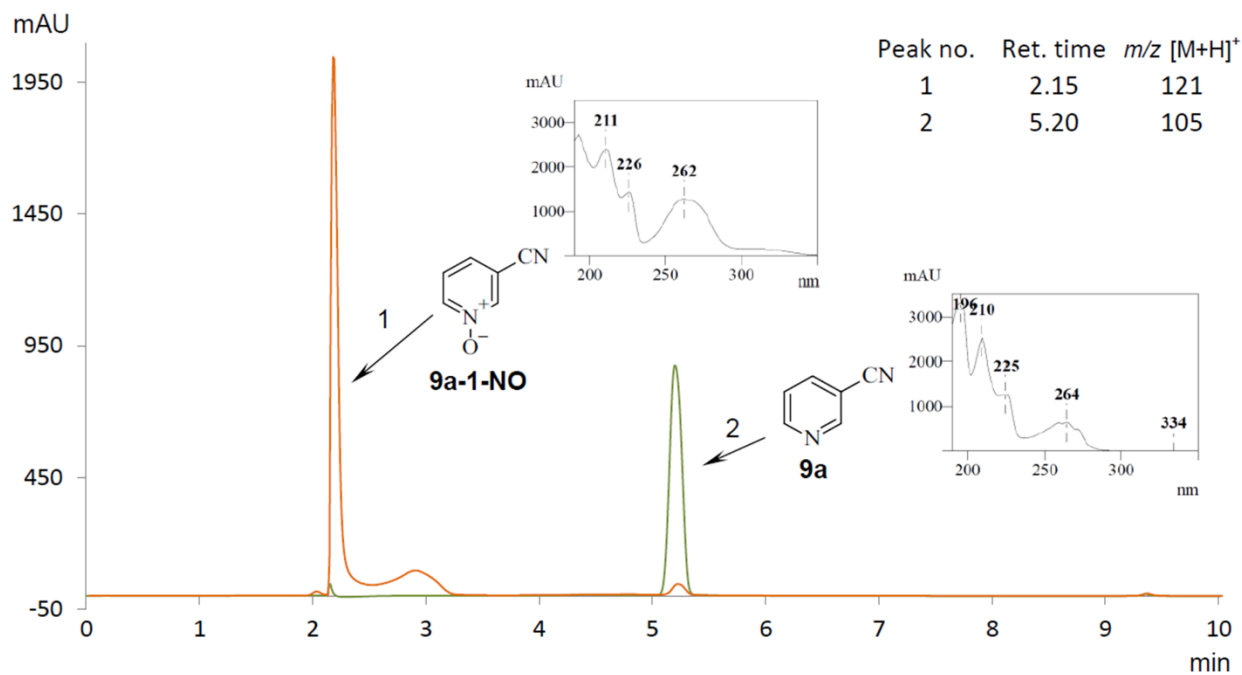

HPLC-MS analysis of 3-cyanopyridine (**9a**) conversion employing wild type PmlABCDEF.

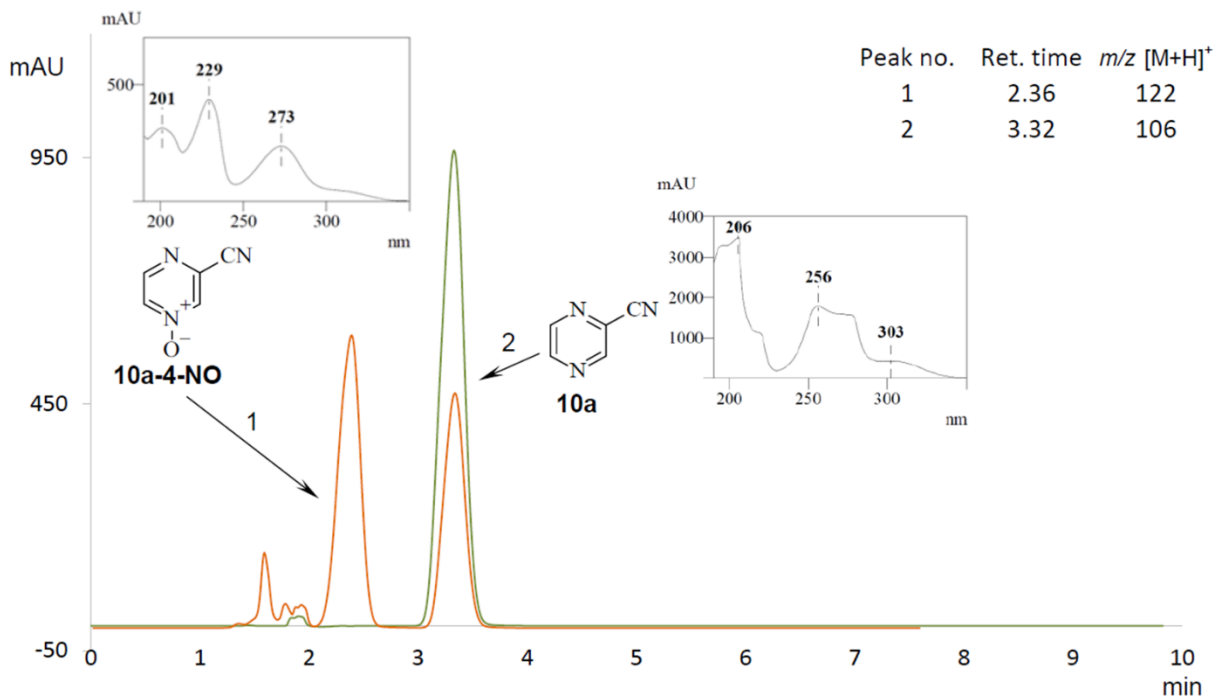

HPLC-MS analysis of 2-cyanopyrazine (**10a**) conversion employing wild type PmlABCDEF.

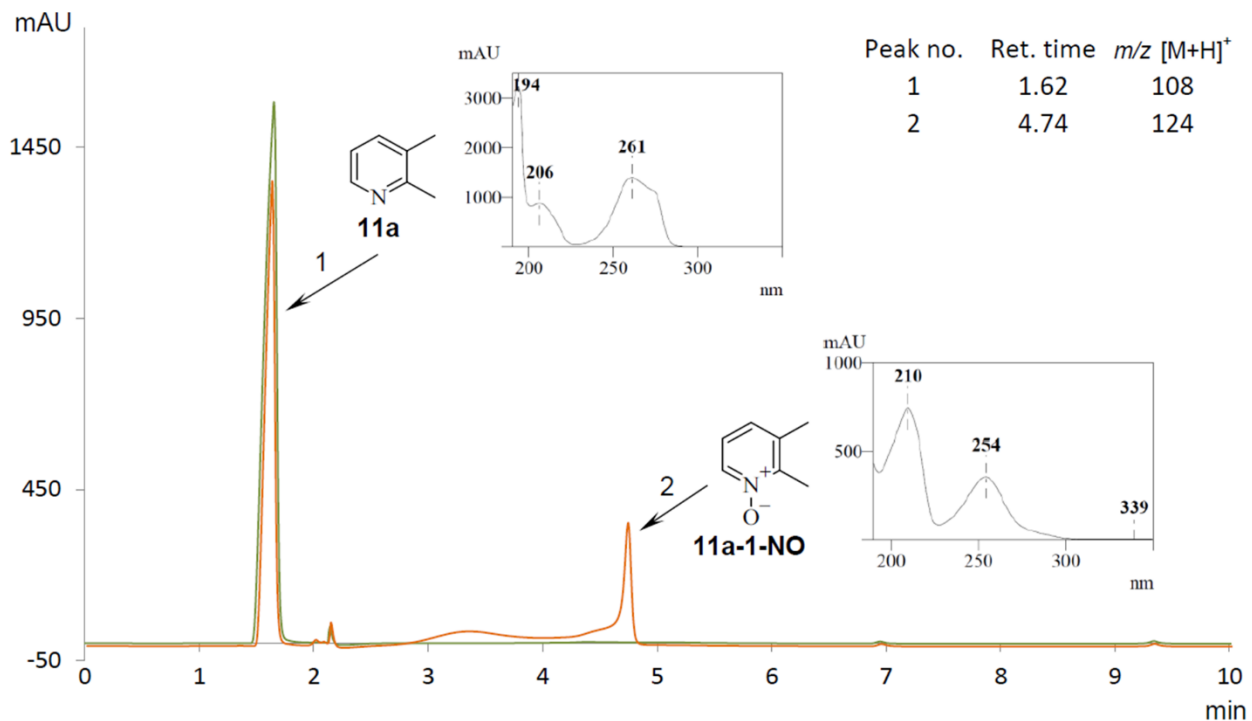

HPLC-MS analysis of 2,3-dimethylpyridine (**11a**) conversion employing wild type PmlABCDEF.

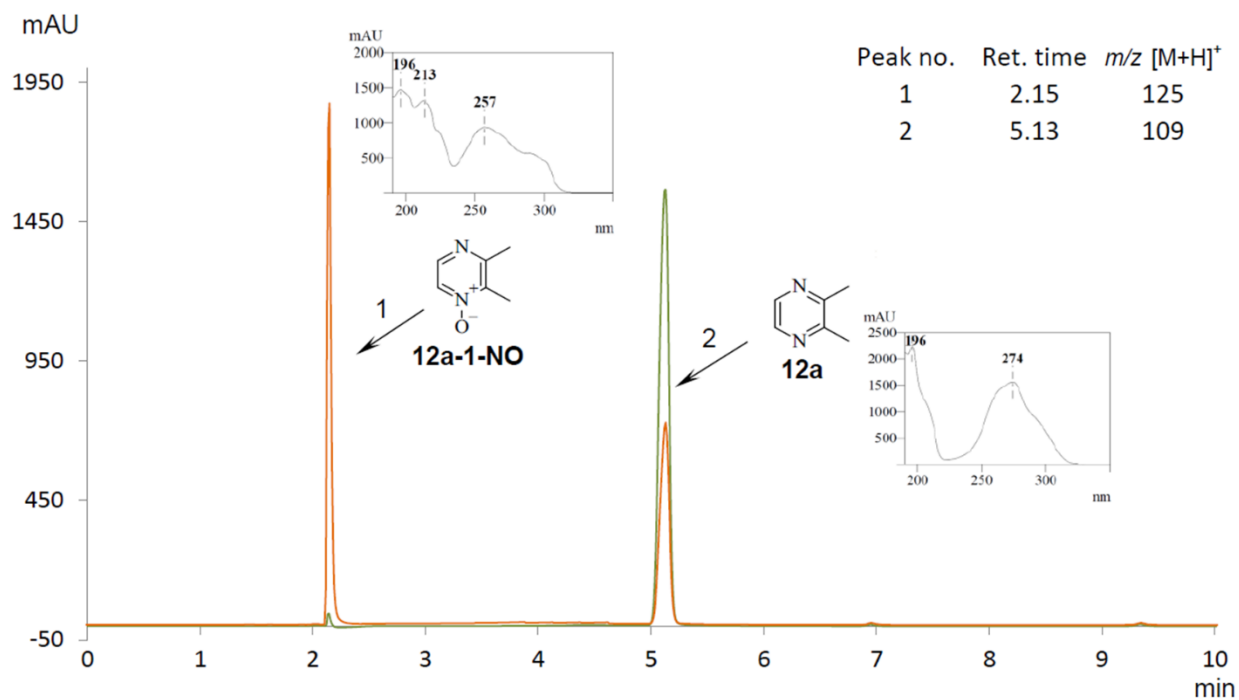

HPLC-MS analysis of 2,3-dimethylpyrazine (**12a**) conversion employing wild type PmlABCDEF.

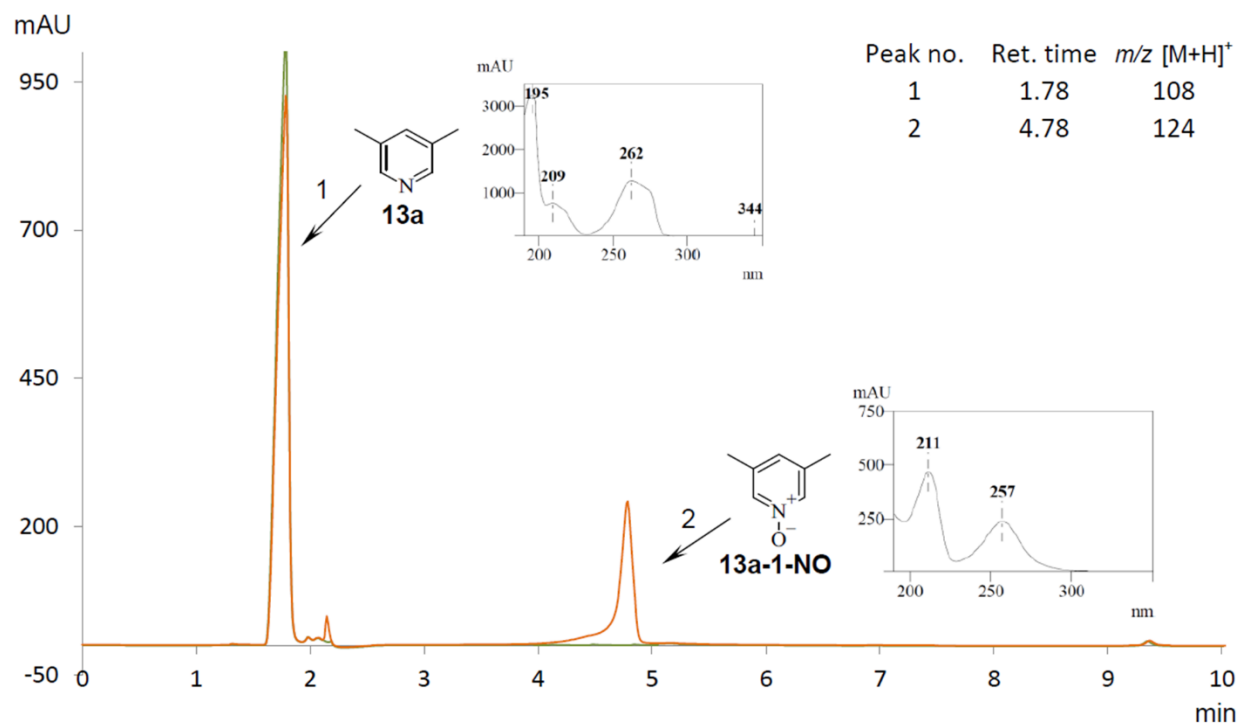

HPLC-MS analysis of 3,5-dimethylpyridine (**13a**) conversion employing wild type PmlABCDEF.

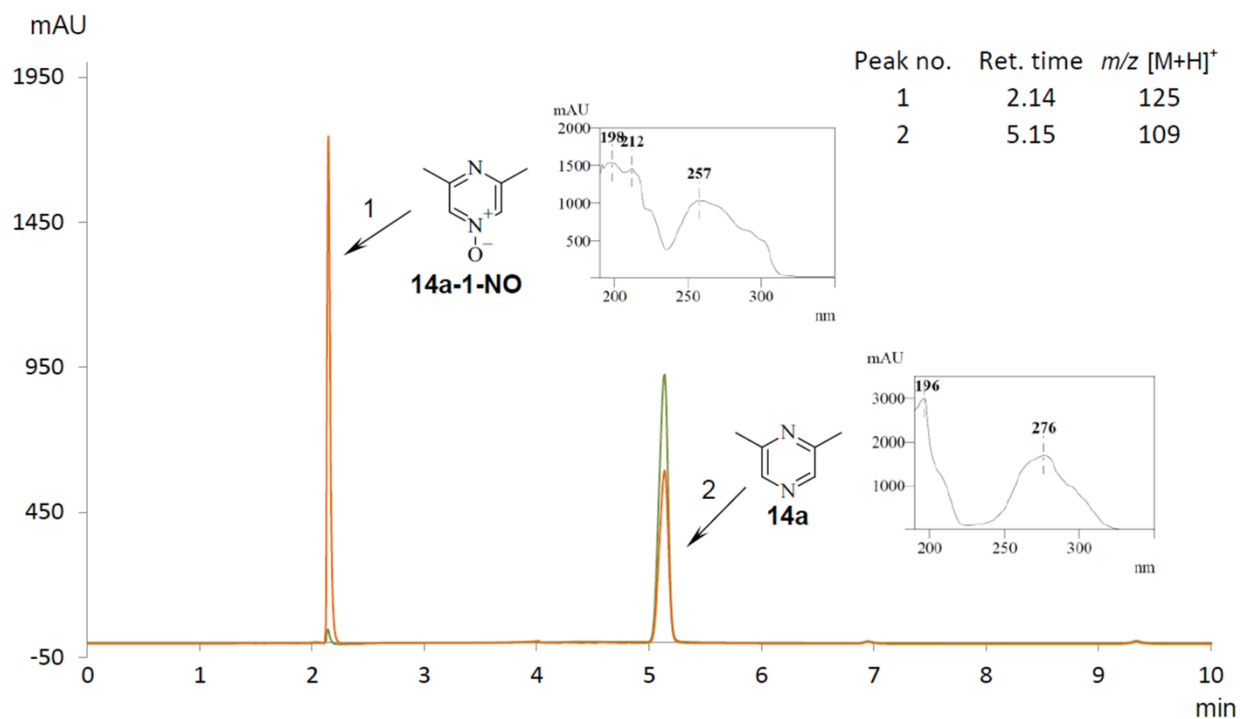

HPLC-MS analysis of 2,6-dimethylpyrazine (**14a**) conversion employing wild type PmlABCDEF.

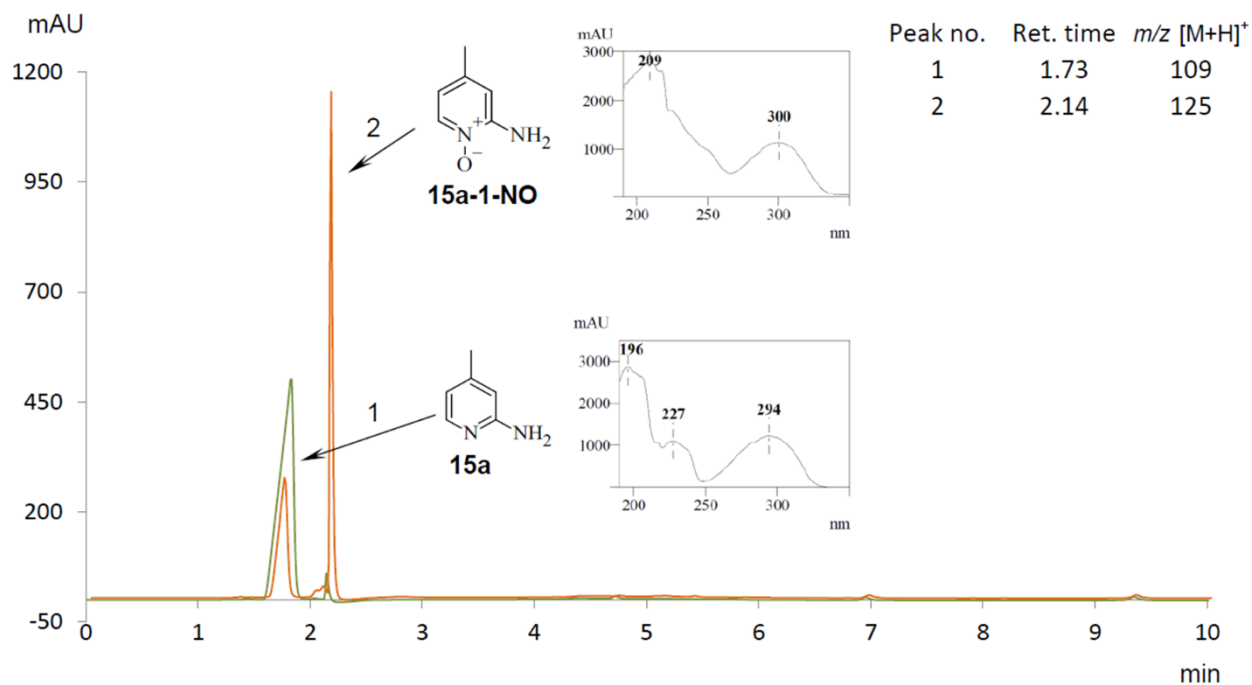

HPLC-MS analysis of 2-amino-4-methylpyridine (**15a**) conversion employing wild type PmlABCDEF.

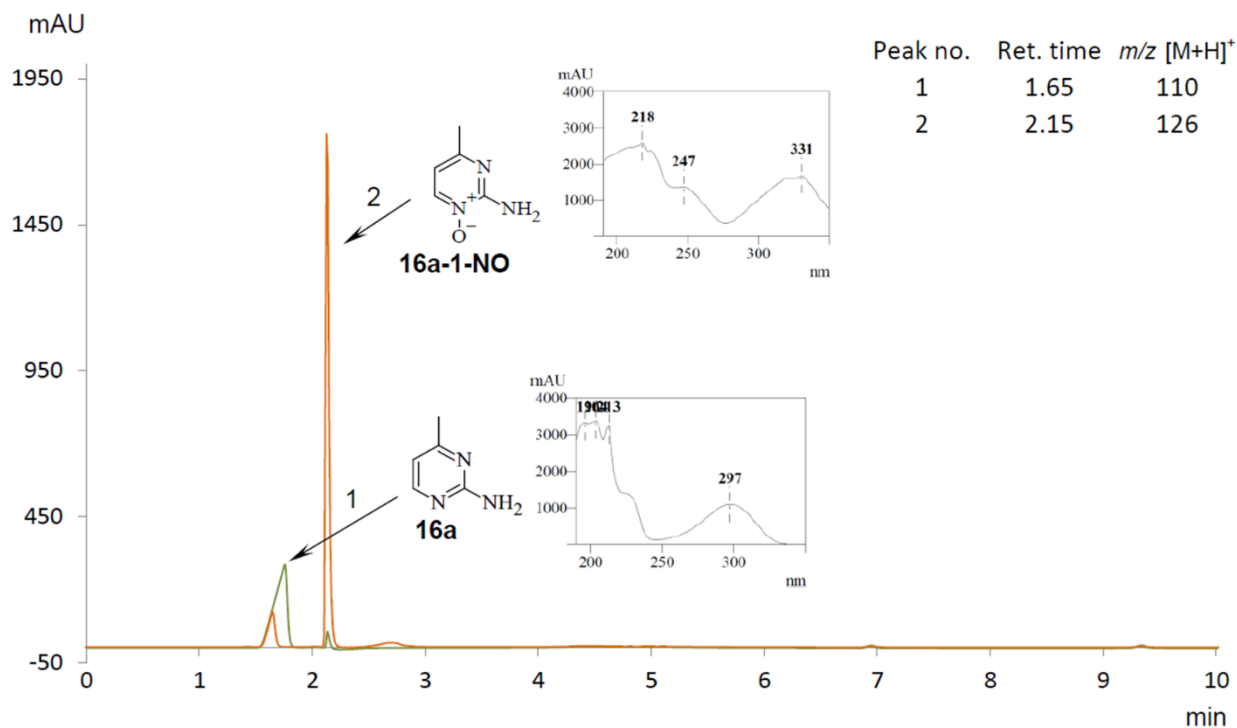

HPLC-MS analysis of 2-amino-4-methylpyrimidine (**16a**) conversion employing wild type PmlABCDEF.

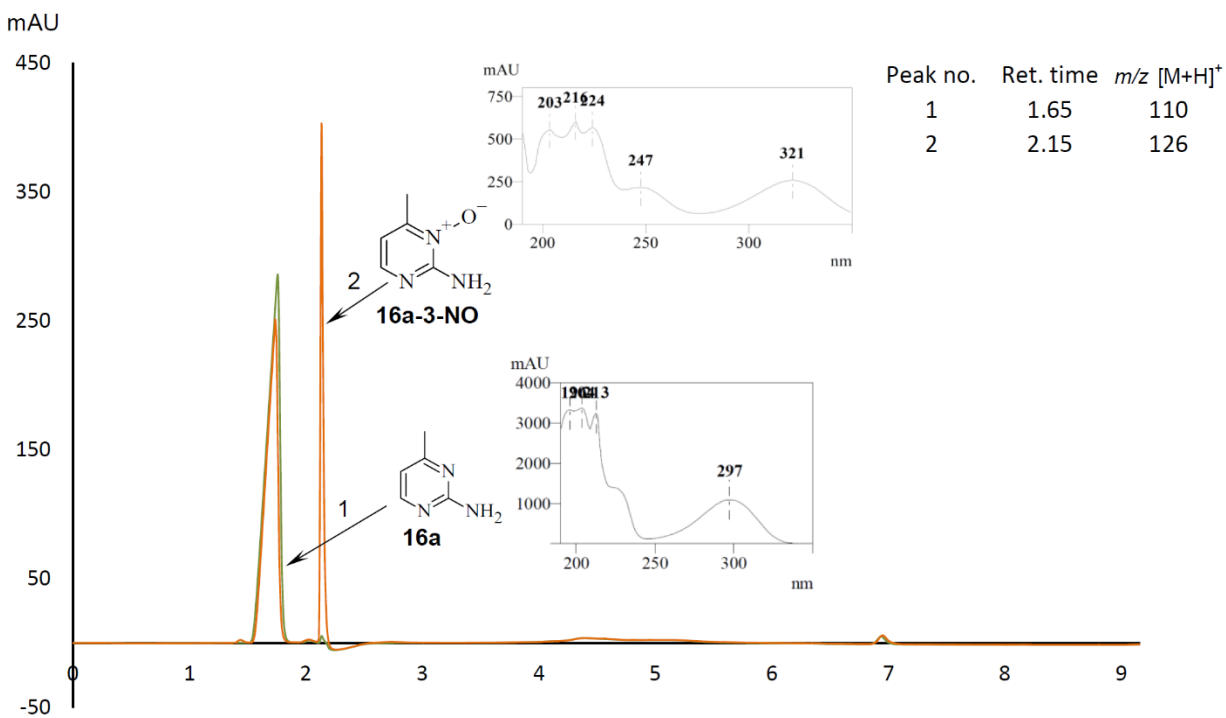

HPLC-MS analysis of 2-amino-4-methylpyrimidine (**16a**) conversion employing PmlD A113G mutant of PmlABCDEF.

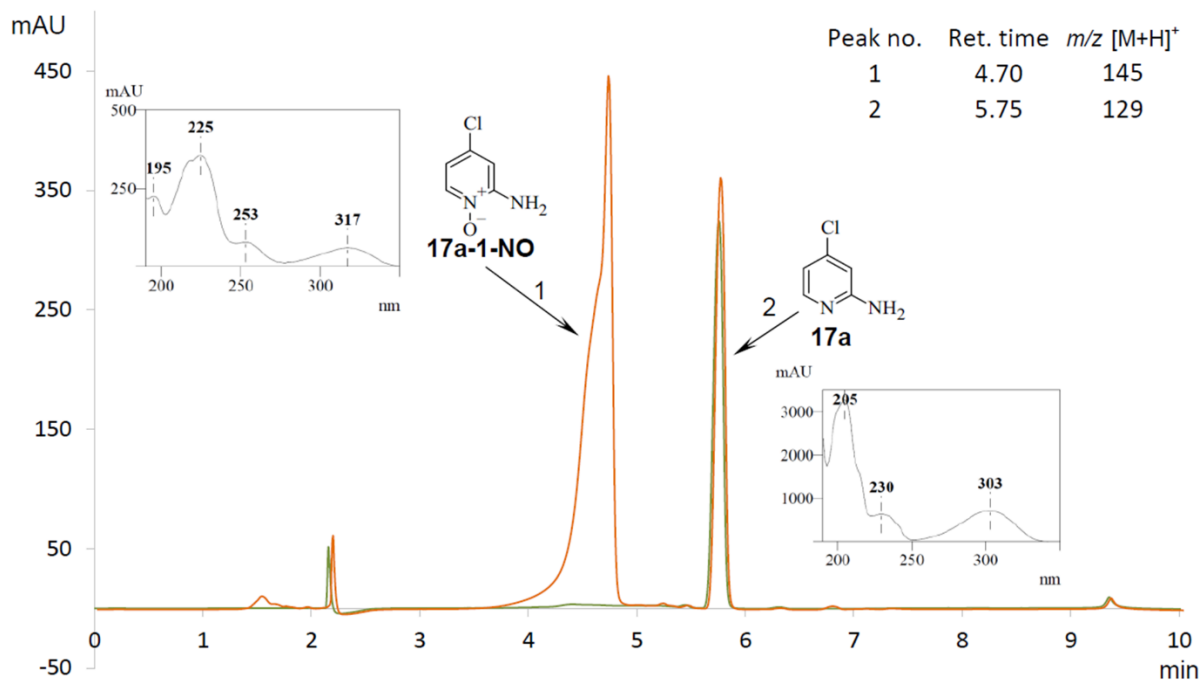

HPLC-MS analysis of 2-amino-4-chloropyridine (**17a**) conversion employing wild type PmlABCDEF.

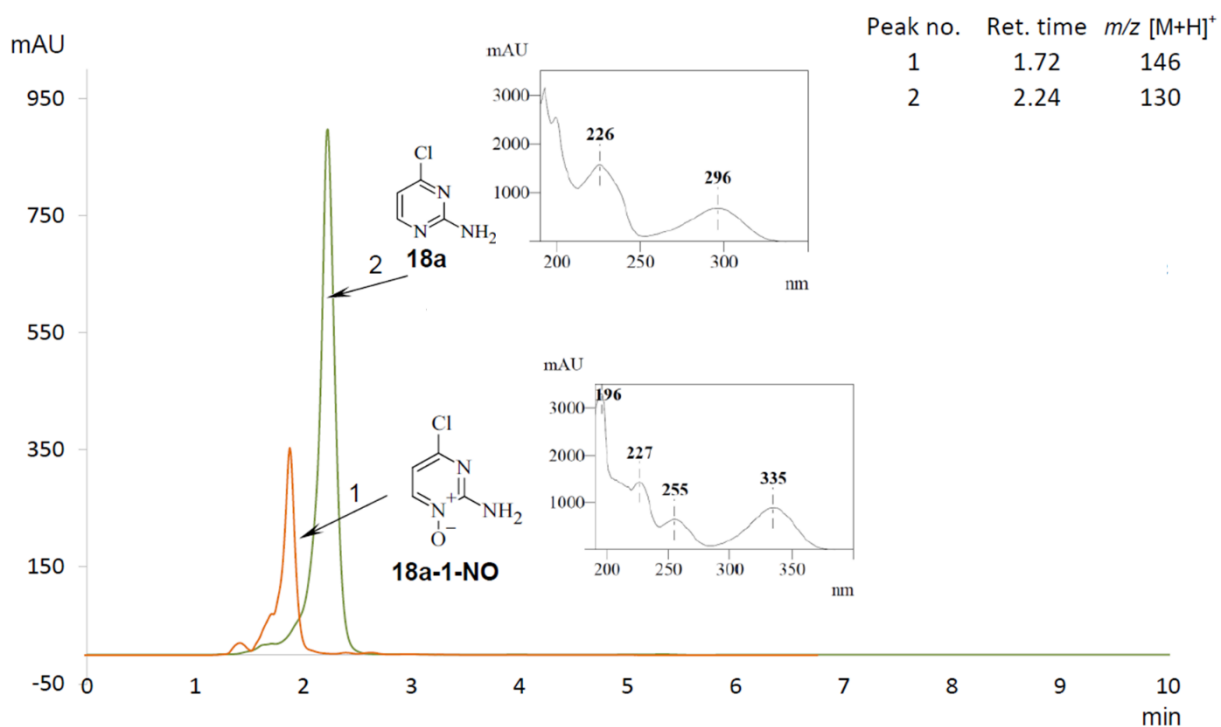

HPLC-MS analysis of 2-amino-4-chloropyrimidine (**18a**) conversion employing wild type PmlABCDEF.



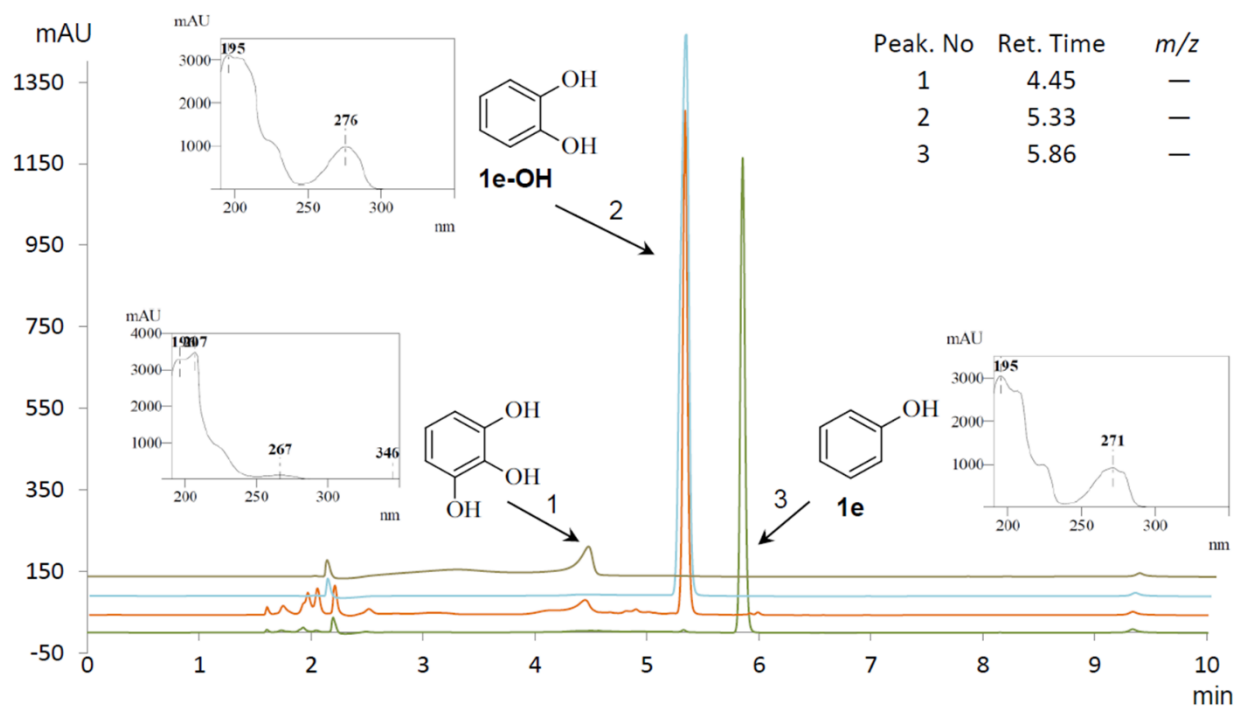

HPLC-MS analysis of phenol (**1e**) conversion employing wild type PmlABCDEF.

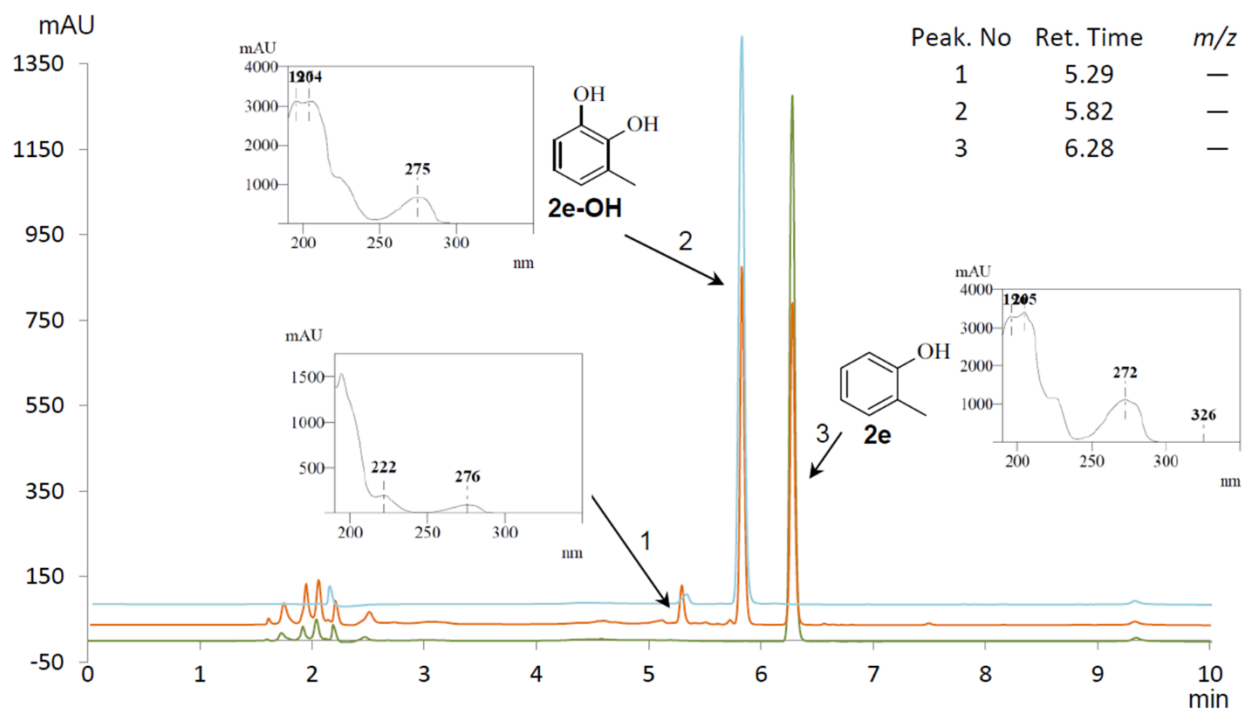

HPLC-MS analysis of 2-methylphenol (**2e**) conversion employing wild type PmlABCDEF.

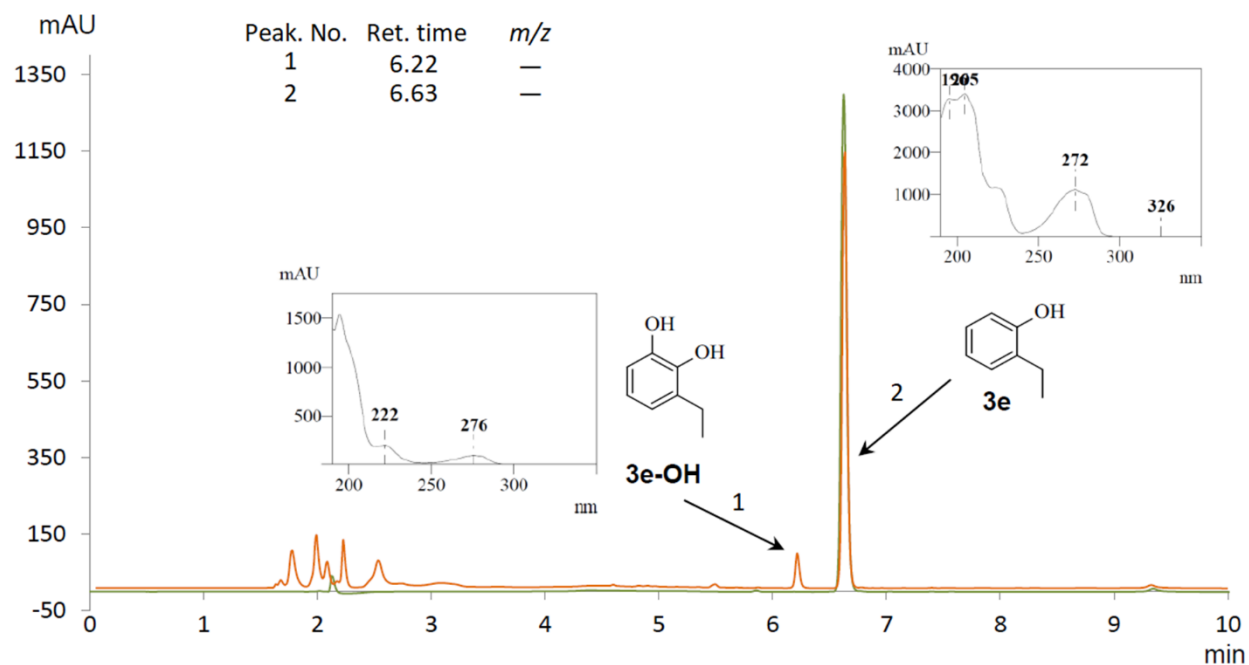

HPLC-MS analysis of 2-ethylphenol (**3e**) conversion employing wild type PmIABCDEF.

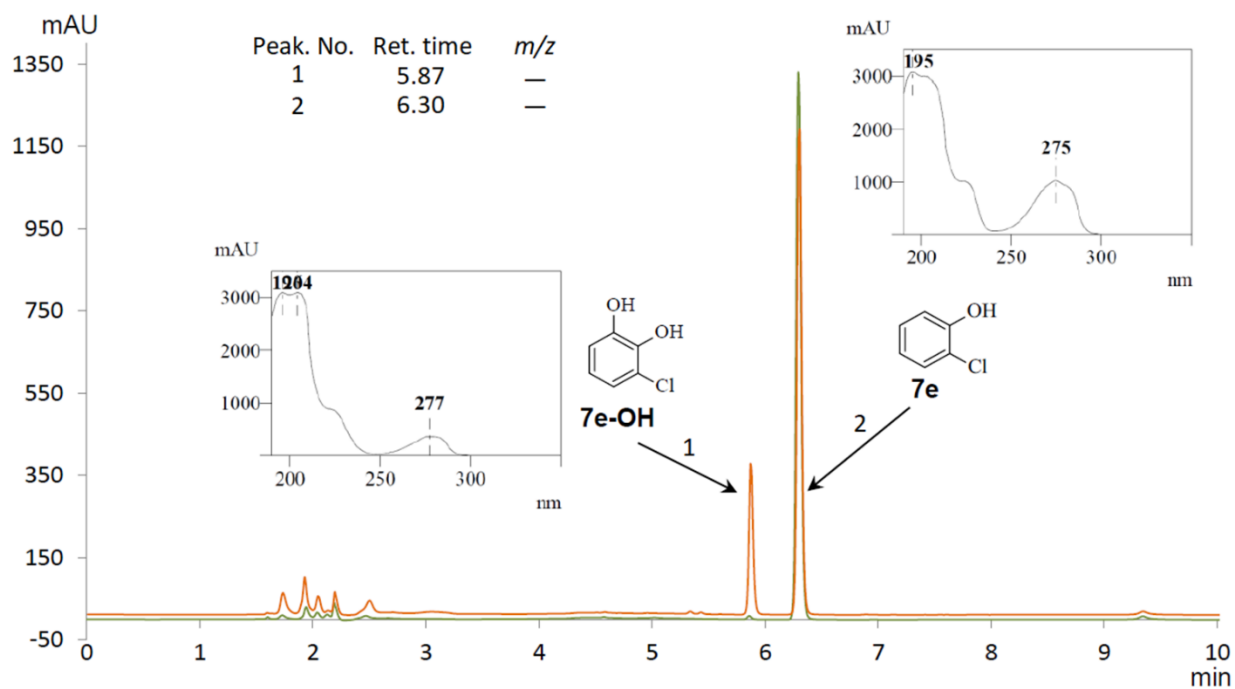

HPLC-MS analysis of 2-chlorophenol (**7e**) conversion employing wild type PmIABCDEF.

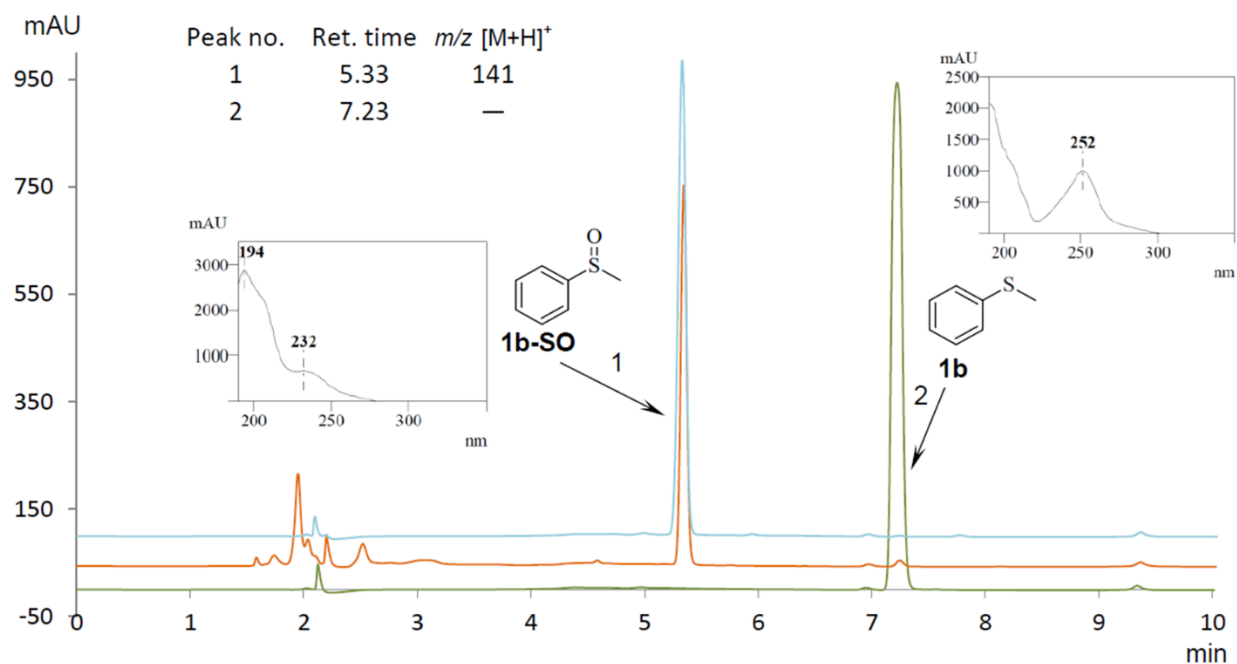

HPLC-MS analysis of methyl phenyl sulfide (**1b**) conversion employing wild type PmlABCDEF.

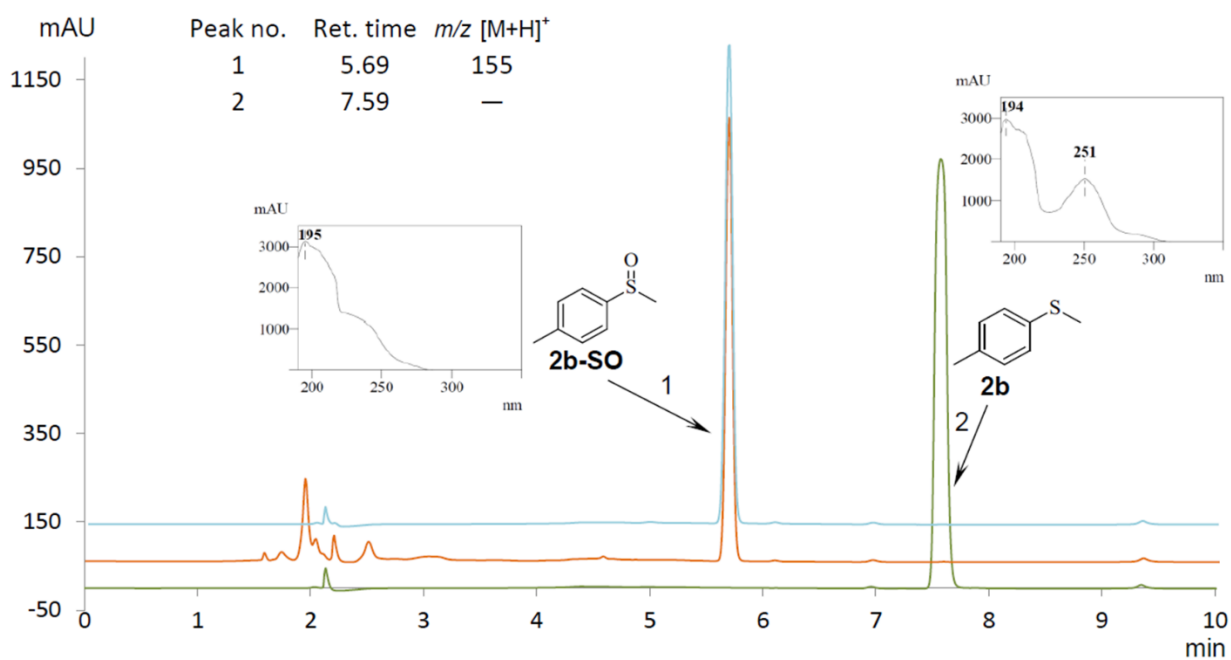

HPLC-MS analysis of methyl *p*-tolyl sulfide (**2b**) conversion employing wild type PmlABCDEF.

## Chromatograms of chiral HPLC analysis

All analyses were done on CHIRALCEL OD-H, 250 x 4.6 mm, 5  $\mu$ m column (Daicel, Japan). Hexane/ 2-propanol = 90 : 10 system was used, flow rate 0.5 ml min<sup>-1</sup>. Stacked chromatograms were generated using wavelengths of 241 nm and 220 nm (pink lines); 258 nm and 254 (black lines). The upper panels show chromatograms of appropriate analytical standards, while the lower panels depict end products of Pml-catalysed bioconversions. The absolute configuration was determined by comparison of the optical rotation with the literature value.

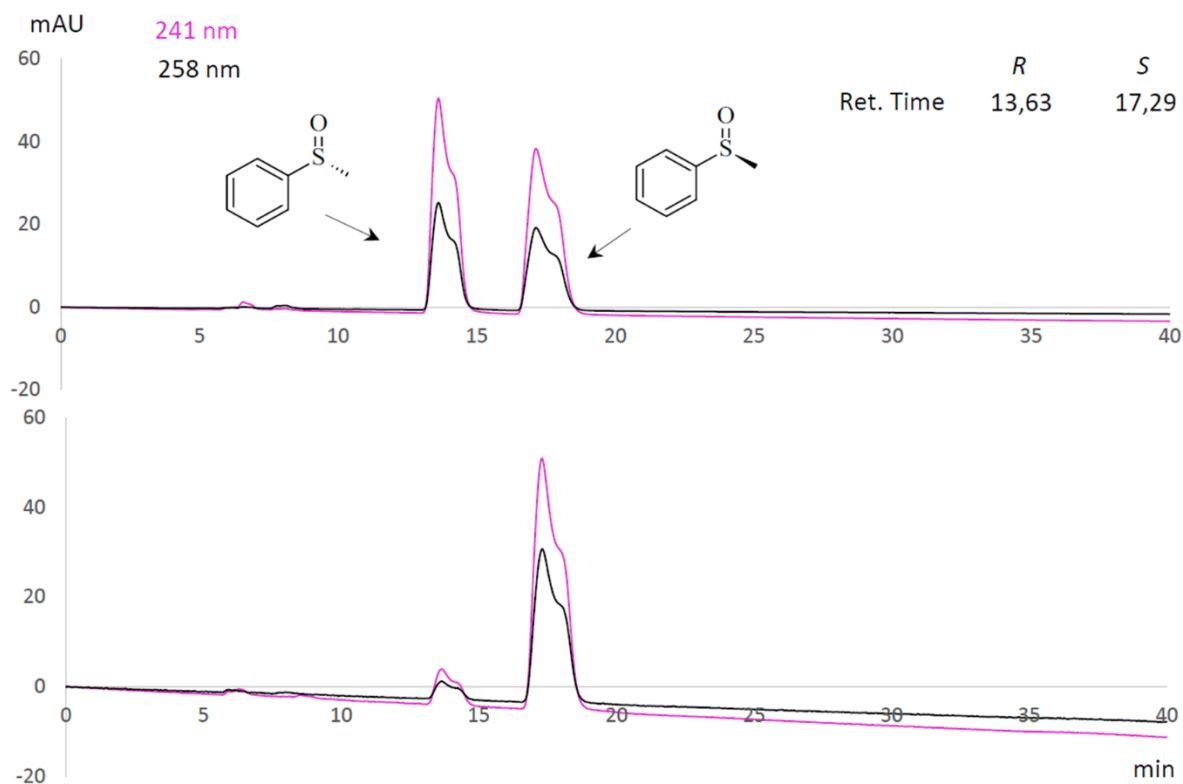

Chiral HPLC analysis of methyl phenyl sulfoxide (**1b-SO**) obtained by wild type PmlABCDEF.

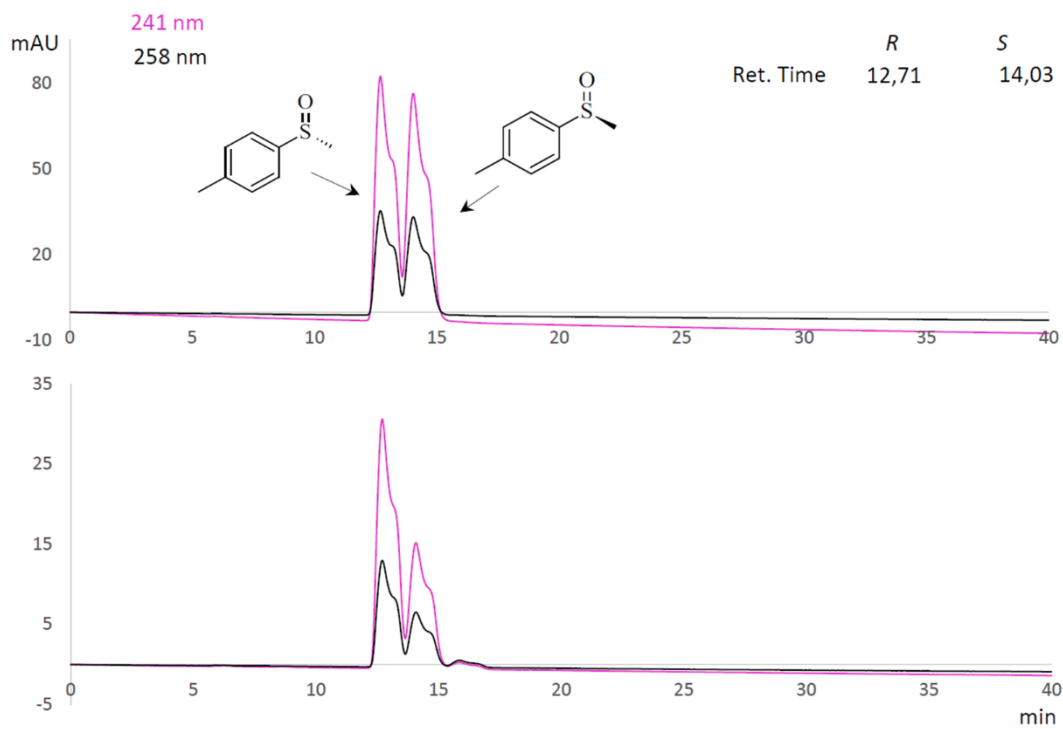

Chiral HPLC analysis of methyl *p*-tolyl sulfoxide (**2b-SO**) obtained by wild type PmlABCDEF.

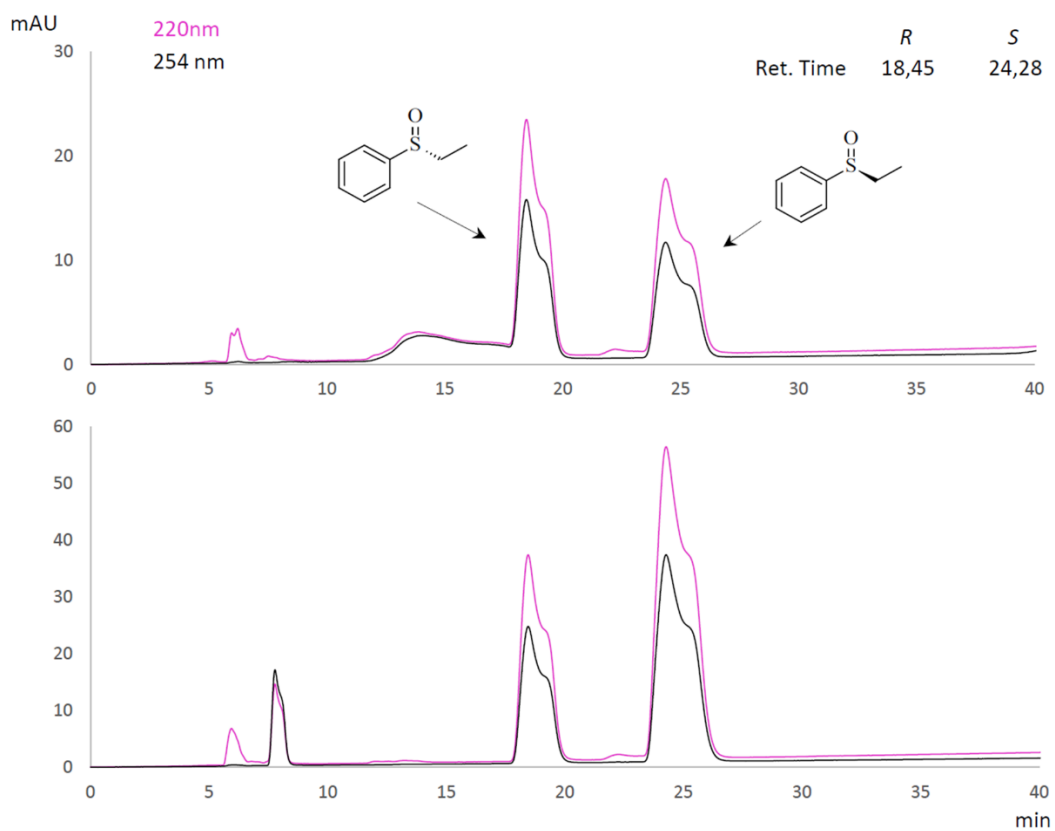

Chiral HPLC analysis of ethyl phenyl sulfoxide (**3b-SO**) obtained by wild type PmlABCDEF.

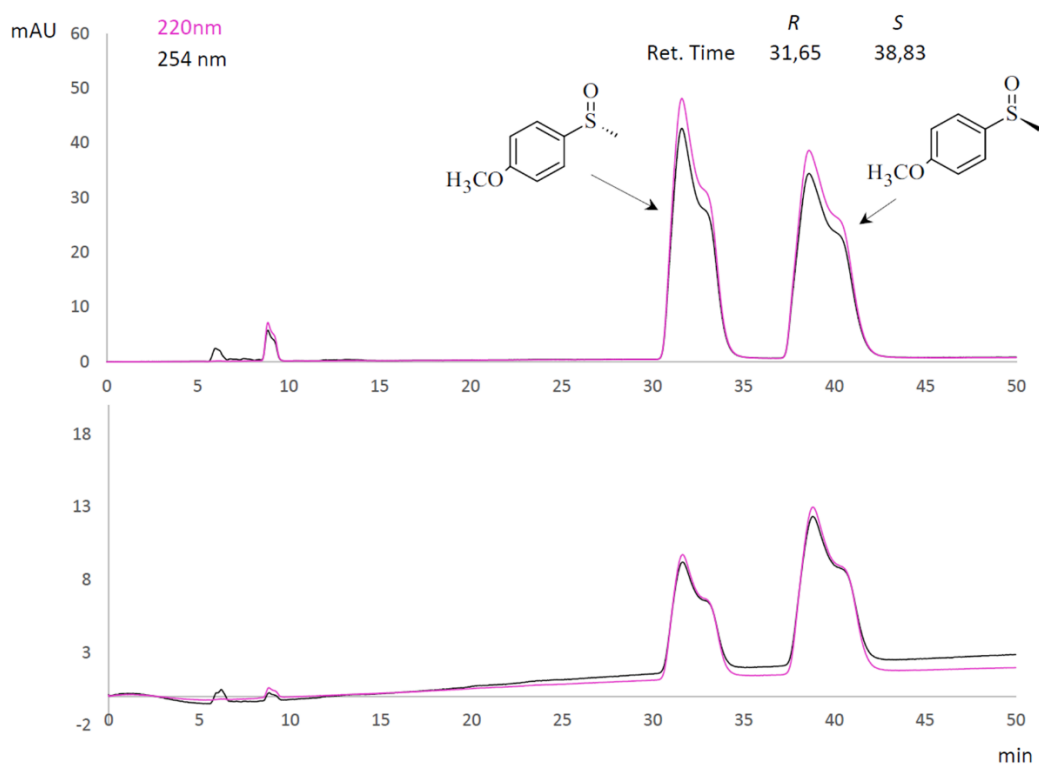

Chiral HPLC analysis of 4-methoxyphenyl methyl sulfoxide (**5b-SO**) obtained by wild type PmlABCDEF.

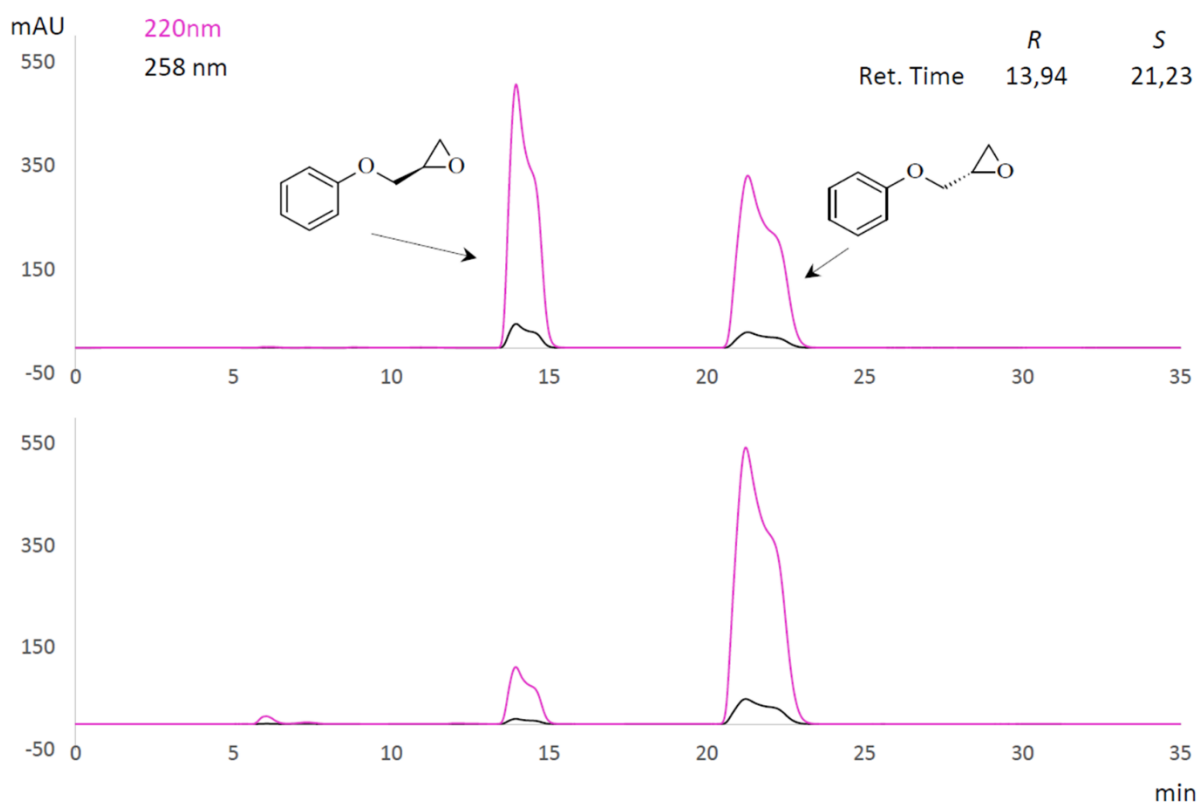

Chiral HPLC analysis of glycidyl phenyl ether (**8c-OX**) obtained by wild type PmlABCDEF.

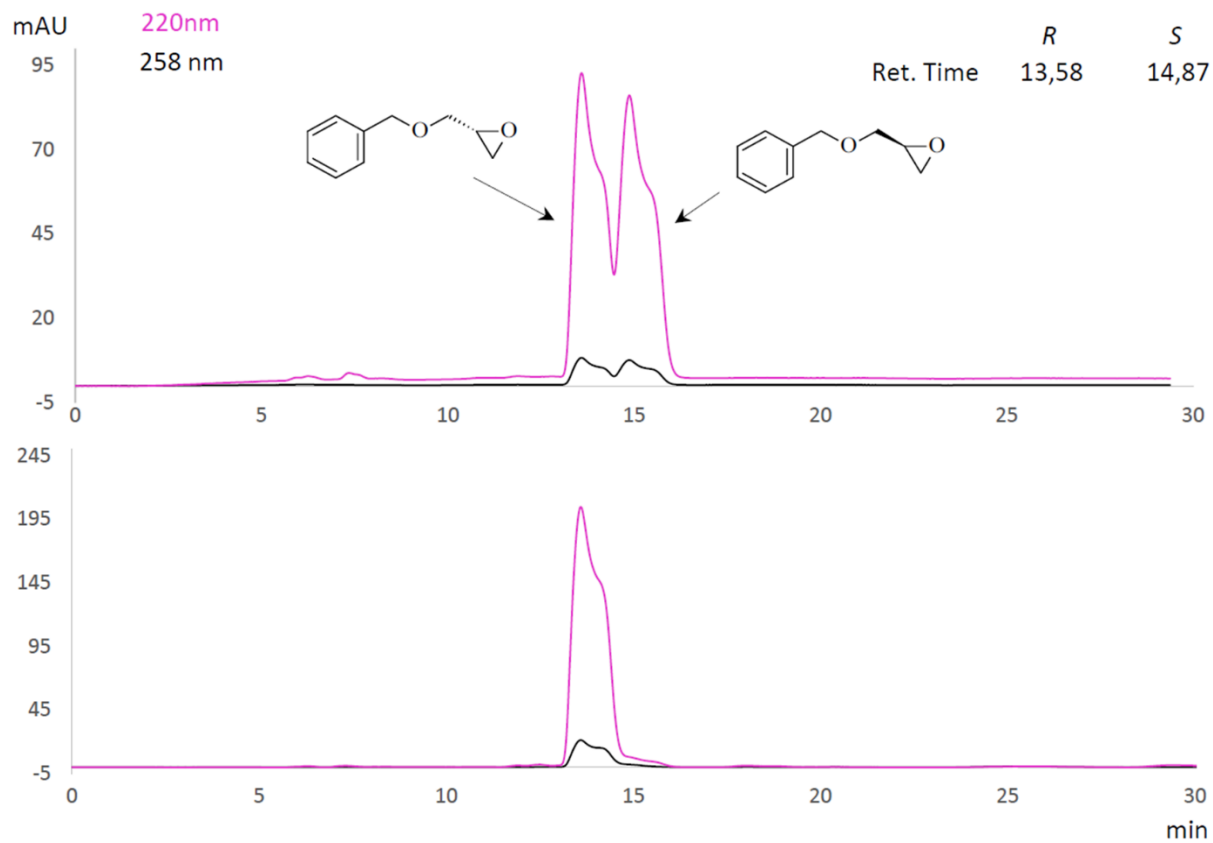

Chiral HPLC analysis of glycidyl benzyl ether (**9c-OX**) obtained by wild type PmlABCDEF.

## Chromatograms of chiral GC analysis

The measurements were done with an Astec Chiraldex G-PN Column (length 30 mm, inner diameter 0.25 mm, film thickness 0.12  $\mu\text{m}$ ) from Sigma-Aldrich, Germany. Helium was used as a carrier gas with a linear velocity of 50  $\text{cm sec}^{-1}$ . The injection volume was 1  $\mu\text{L}$  with an injection port temperature of 350  $^{\circ}\text{C}$  and a split ratio of 1:200. The upper panels show chromatograms of appropriate analytical standards, while the lower panels depict end products of Pml-catalysed bioconversions. The absolute configuration was determined by comparison of the optical rotation with the literature value.

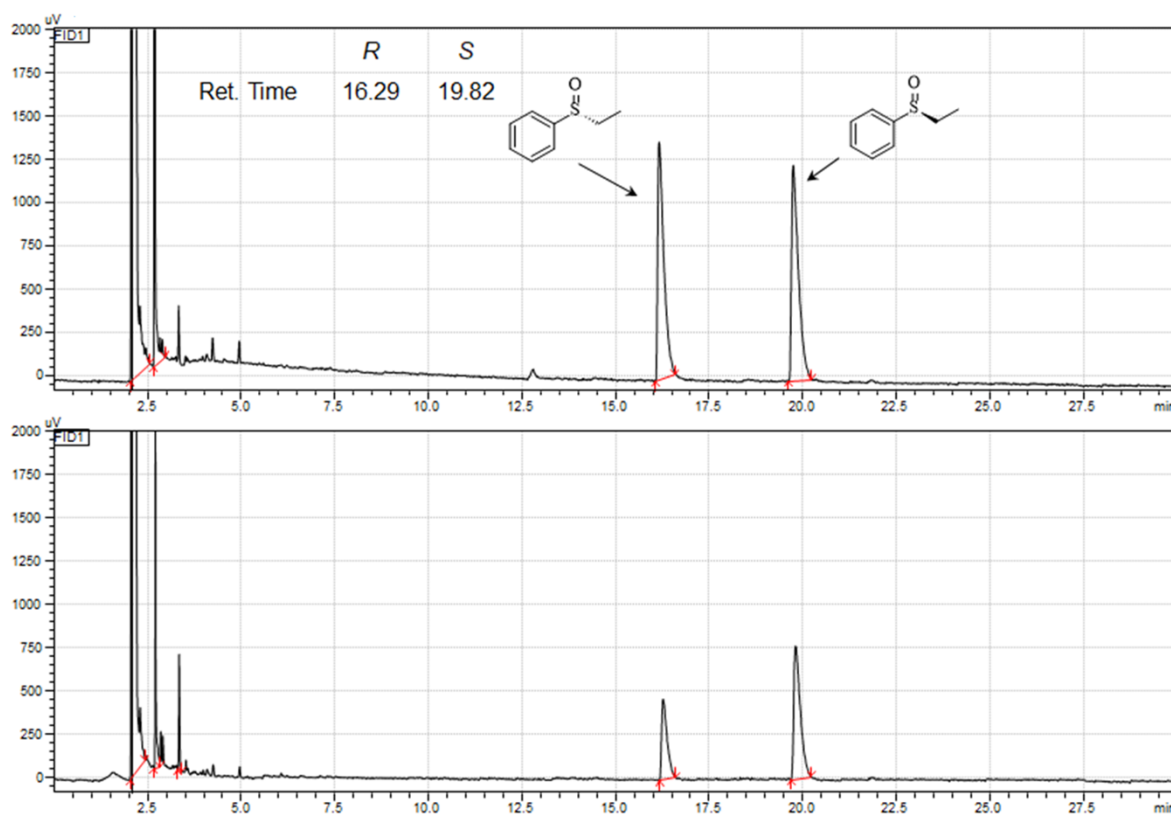

Chiral GC analysis of ethyl phenyl sulfoxide (**3b-SO**) obtained by wild type PmlABCDEF.



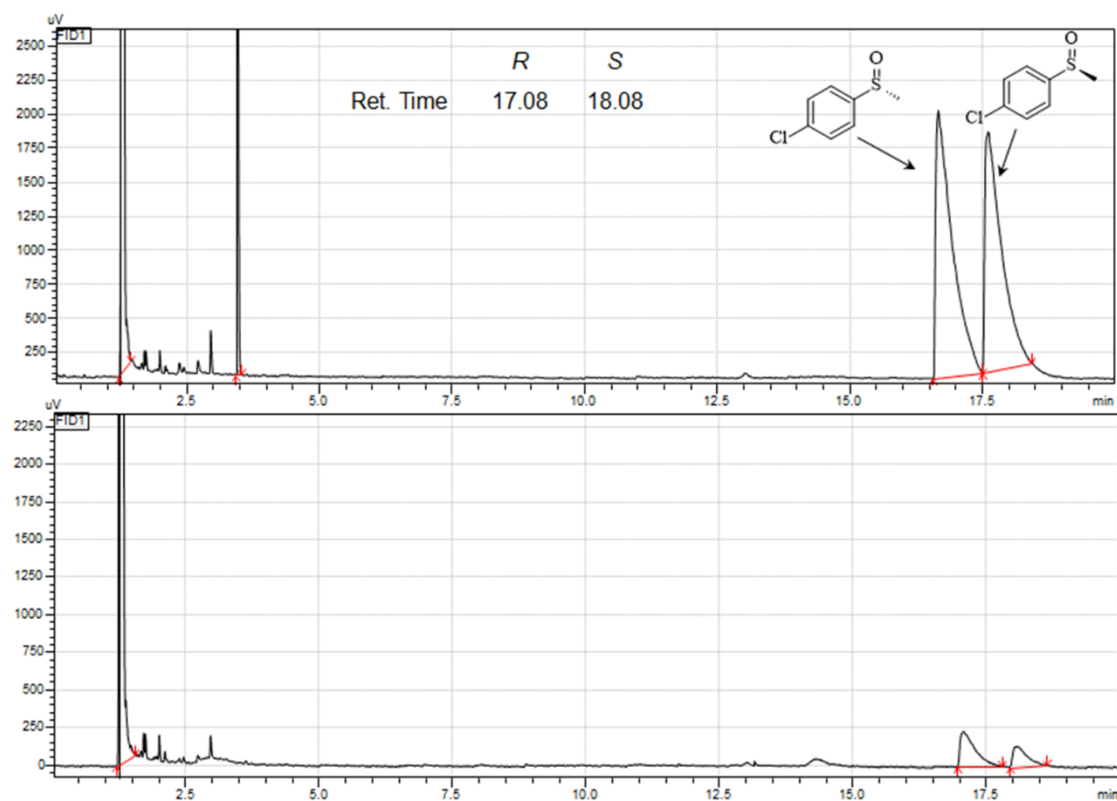

Chiral GC analysis of methyl 4-chlorophenyl sulfoxide (**4b-SO**) obtained by wild type PmlABCDEF.

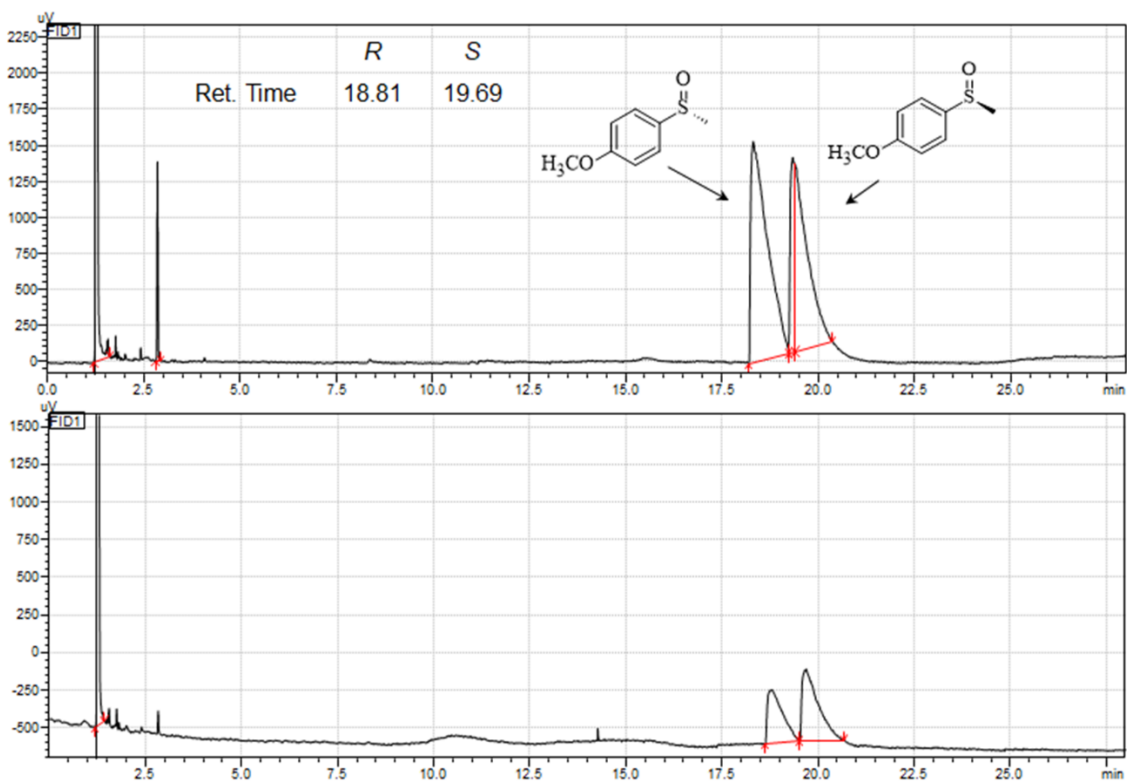

Chiral GC analysis of 4-methoxyphenyl methyl sulfoxide (**5b-SO**) obtained by wild type PmlABCDEF.

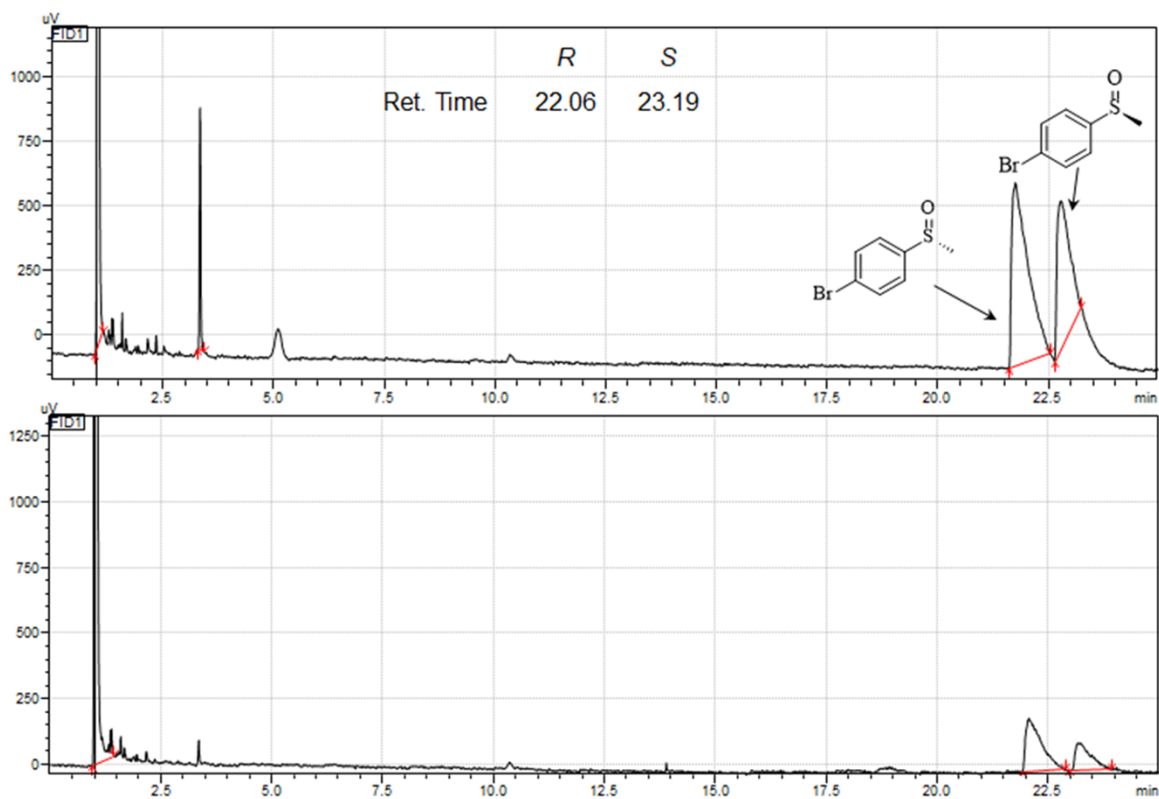

Chiral GC analysis of methyl 4-bromophenyl sulfoxide (**6b-SO**) obtained by wild type PmlABCDEF.

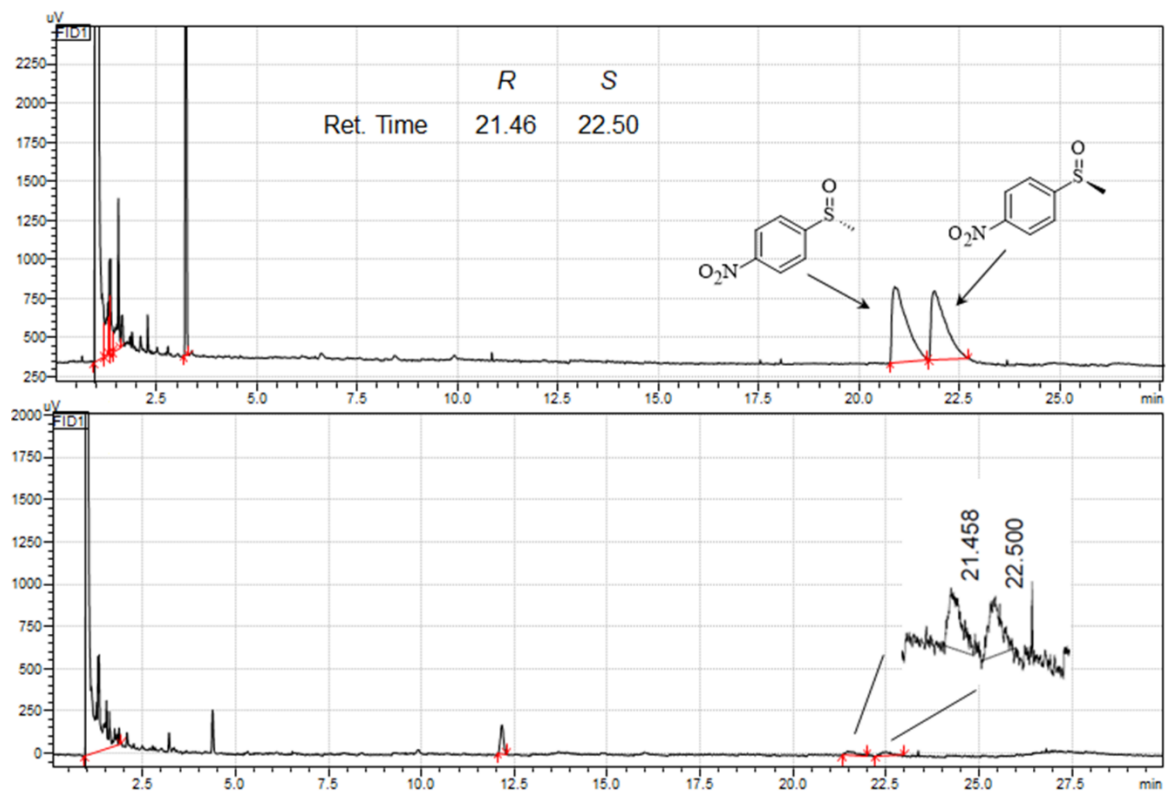

Chiral GC analysis of methyl 4-nitrophenyl sulfoxide (**7b-SO**) obtained by wild type PmlABCDEF

## Chromatograms of GC-MS analysis

The sample (0.5 mL) of the whole-cell biocatalysis reaction was transferred to a 1.5 mL tube and mixed with an equal part of ethyl acetate (dichloromethane for styrene). The mixture was intensively shaken followed by centrifugation (12000 *g* for 5 min), 0.5 mL of organic phase was dried over MgSO<sub>4</sub> or Na<sub>2</sub>SO<sub>4</sub> and analysed with GC-MS. Stacked GC chromatograms were designated as follows: i) substrate incubated with *P. putida* KT2440 cells (control, grey line) ii) substrate incubated with *P. putida* KT2440 cells producing Pml monooxygenase (reaction, pink line). A peak report table of the reaction sample is displayed. 1-Octanol was used as an internal standard in all samples except styrene.

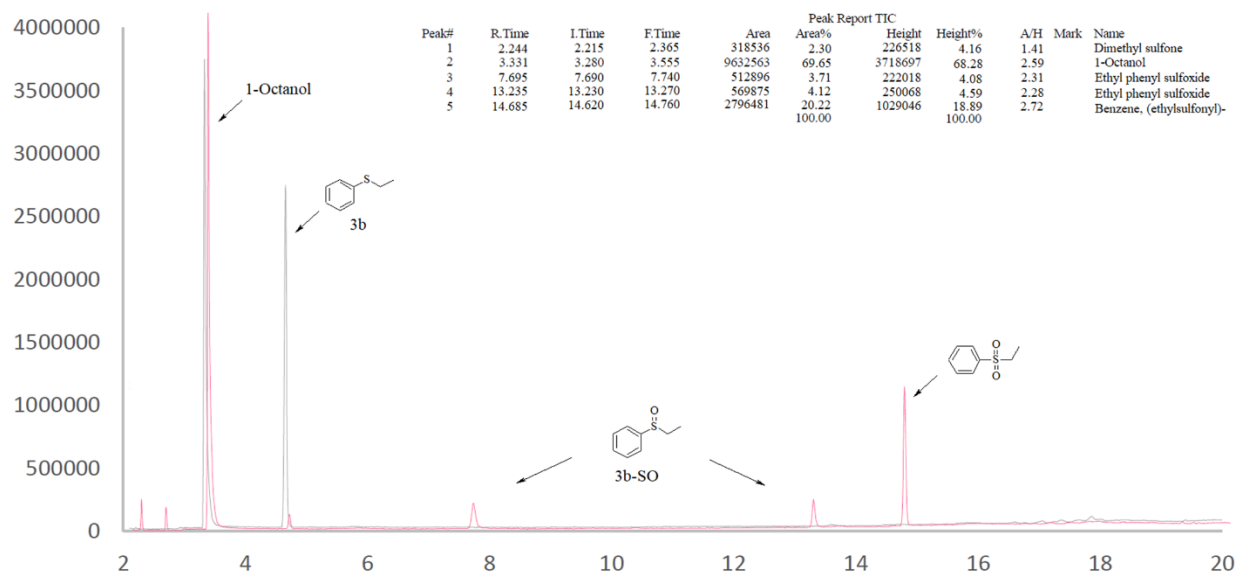

GC-MS analysis of ethyl phenyl sulfide (**3b**) conversion employing wild type PmlABCDEF.

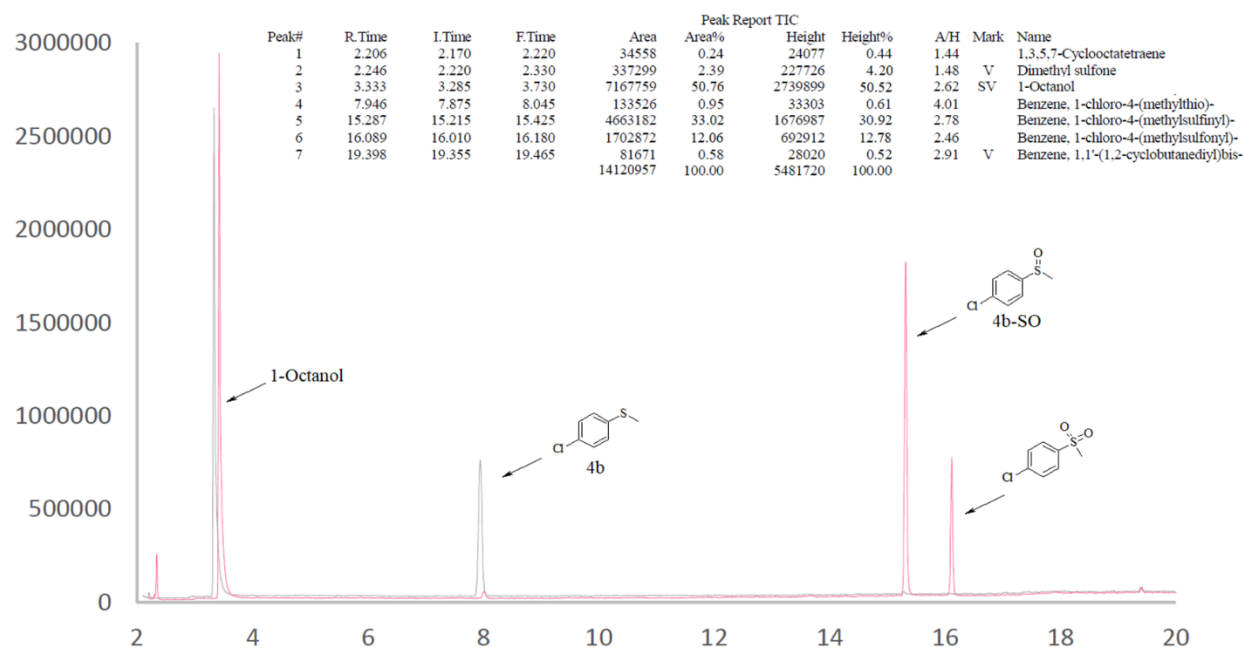

GC-MS analysis of 4-chlorophenyl methyl sulfide (**4b**) conversion employing wild type PmlABCDEF.

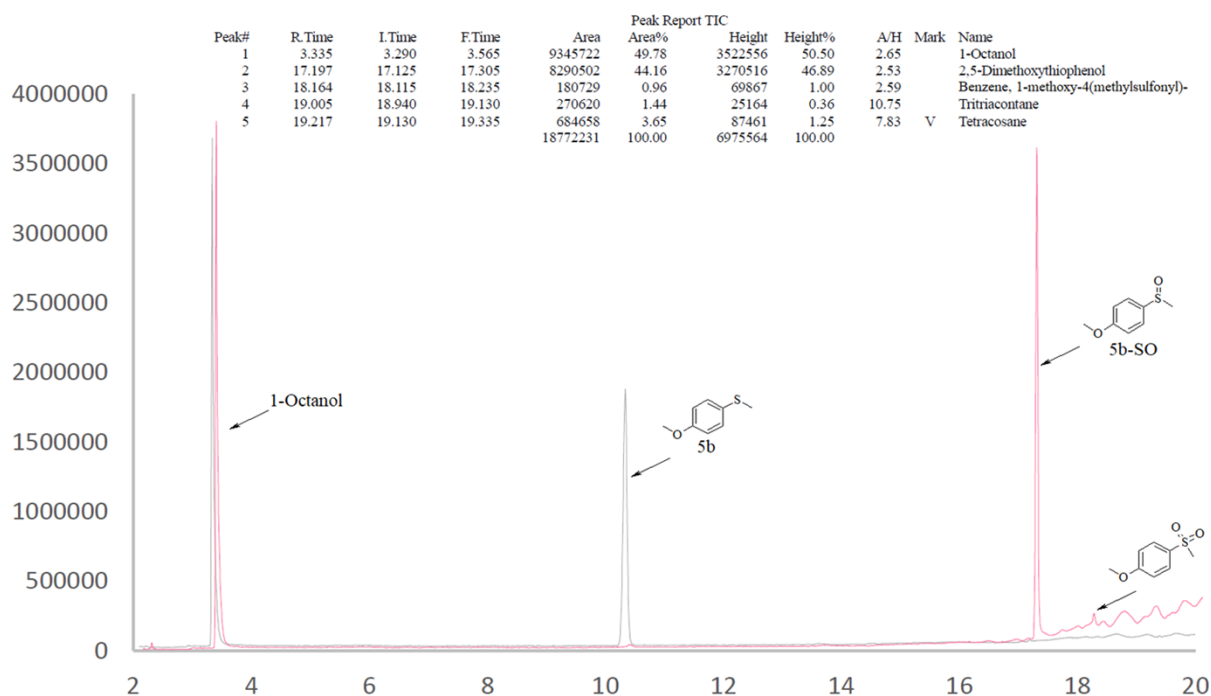

GC-MS analysis of 4-methoxyphenylmethyl sulfide (**5b**) conversion employing wild type PmlABCDEF.

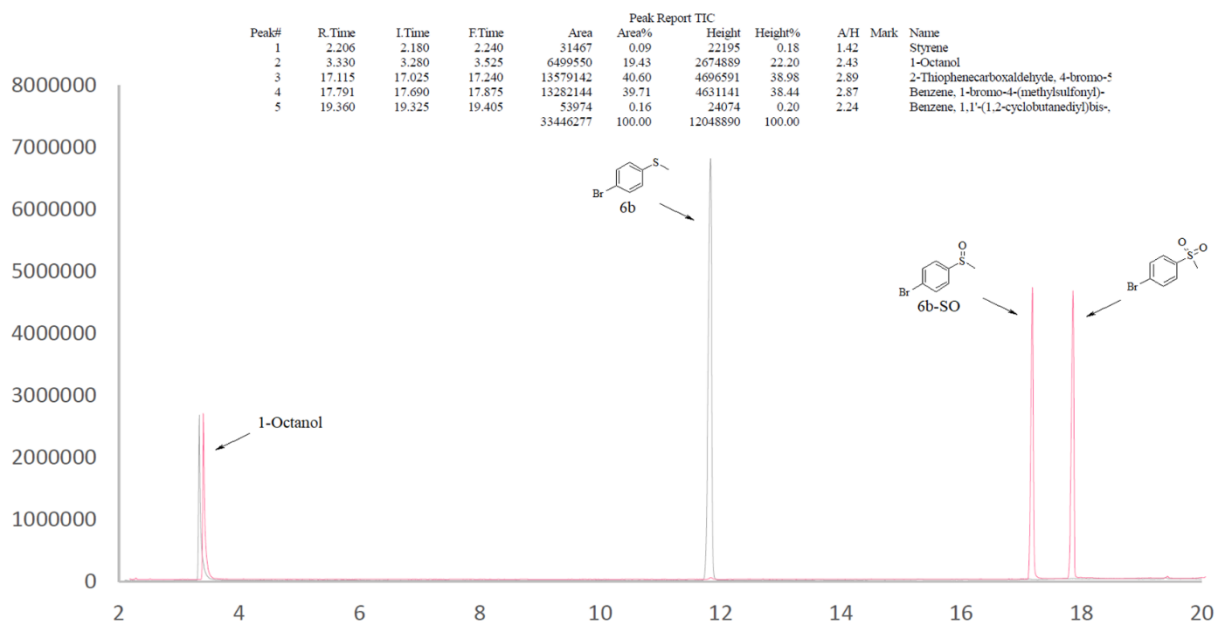

GC-MS analysis of 4-bromophenyl methyl sulfide (**6b**) conversion employing wild type PmlABCDEF.

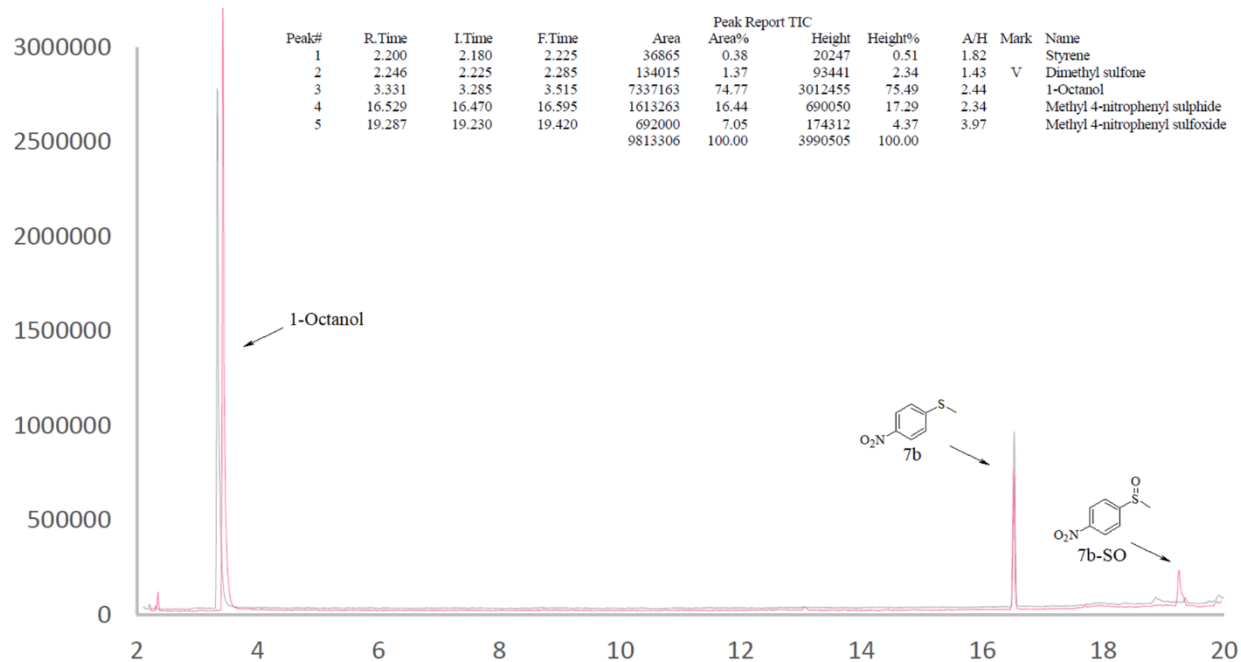

GC-MS analysis of methyl-4-nitrophenyl sulfide (**7b**) conversion employing wild type PmlABCDEF.

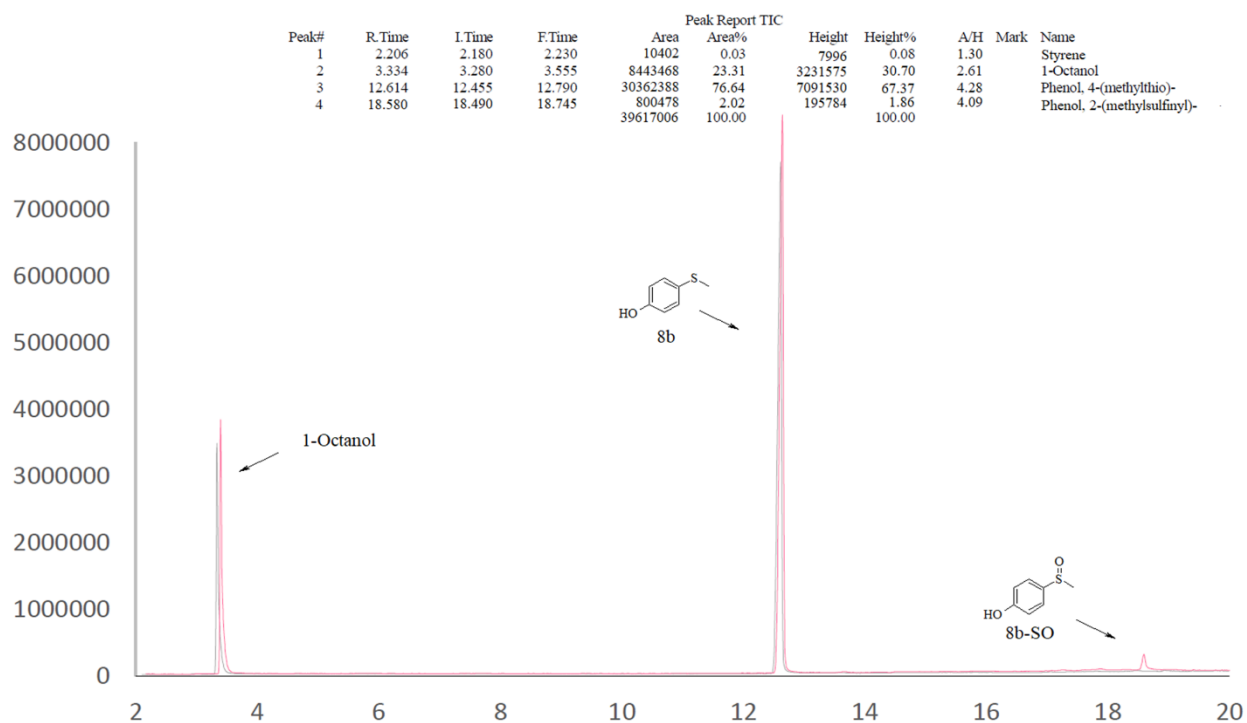

GC-MS analysis of 4-(methylthio)phenol (**8b**) conversion employing wild type PmIABCDEF.

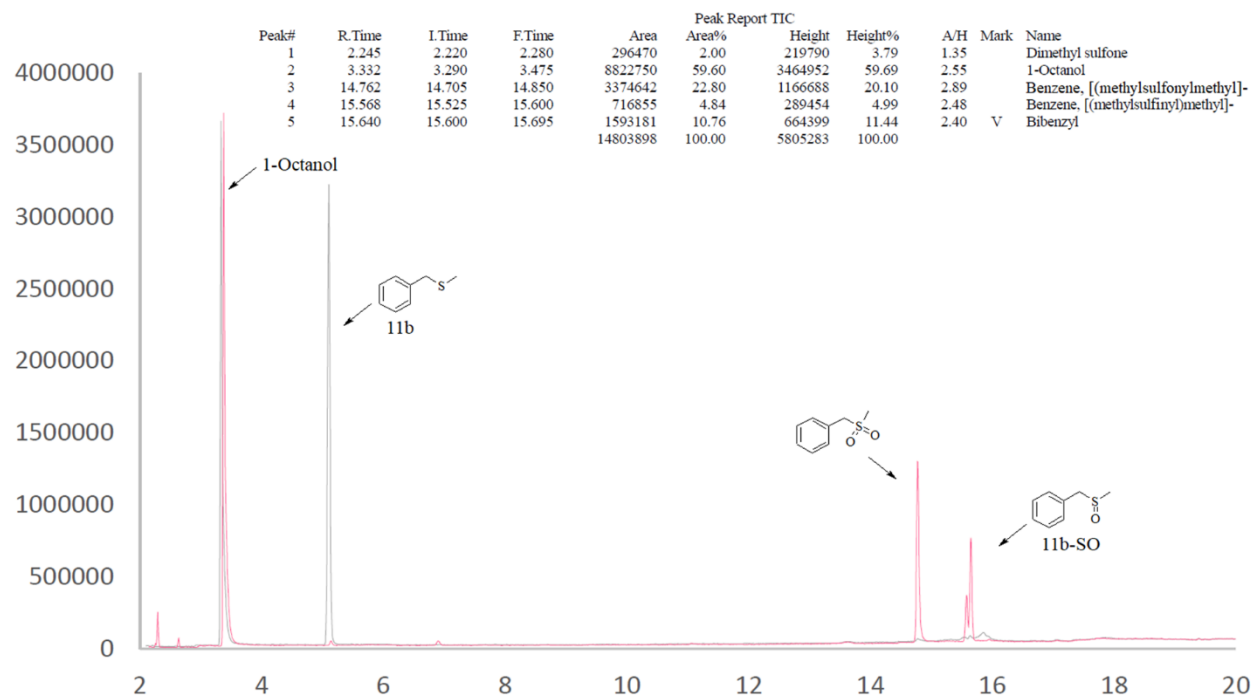

GC-MS analysis of benzyl methyl sulfide (**11b**) conversion employing wild type PmIABCDEF.

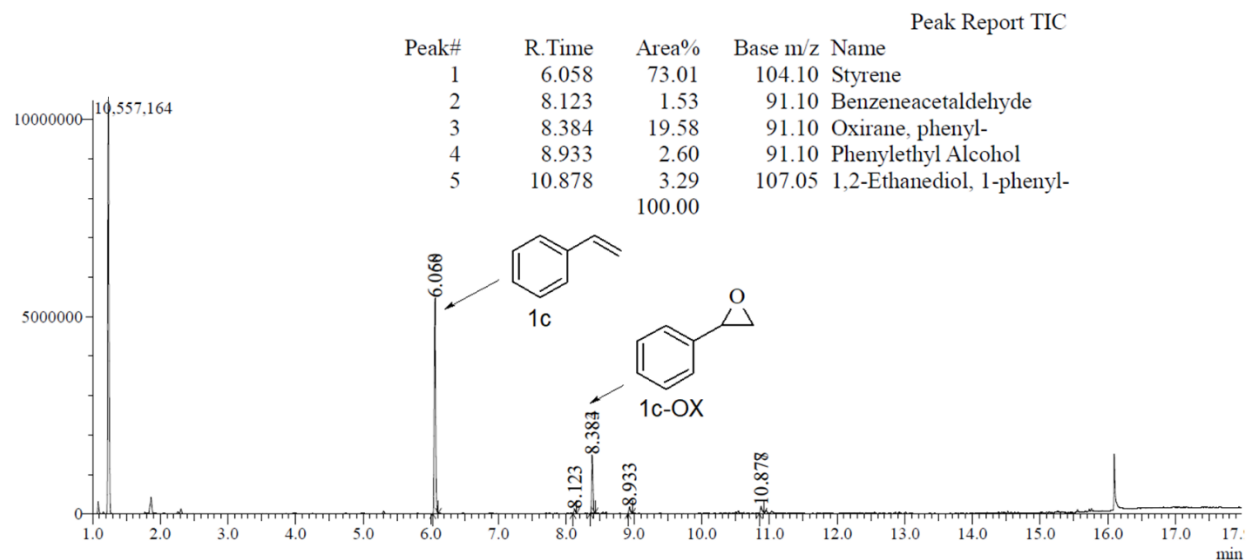

GC-MS analysis of styrene (**1c**) conversion employing wild type PmlABCDEF.

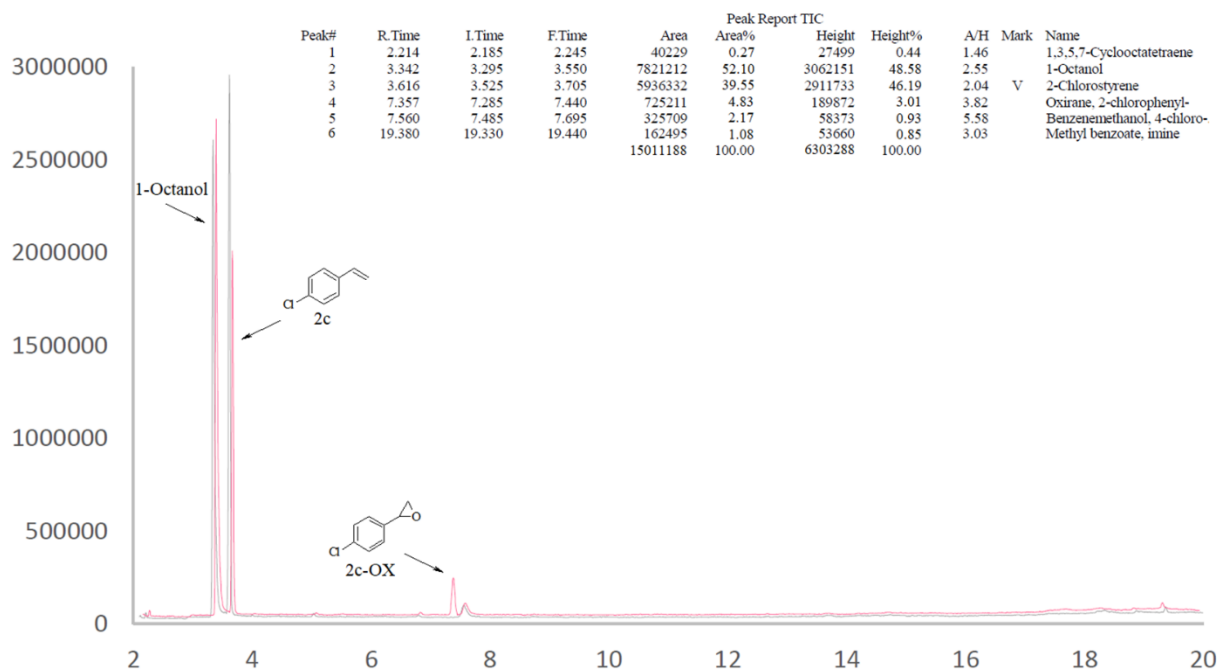

GC-MS analysis of 4-chlorostyrene (**2c**) conversion employing wild type PmlABCDEF.

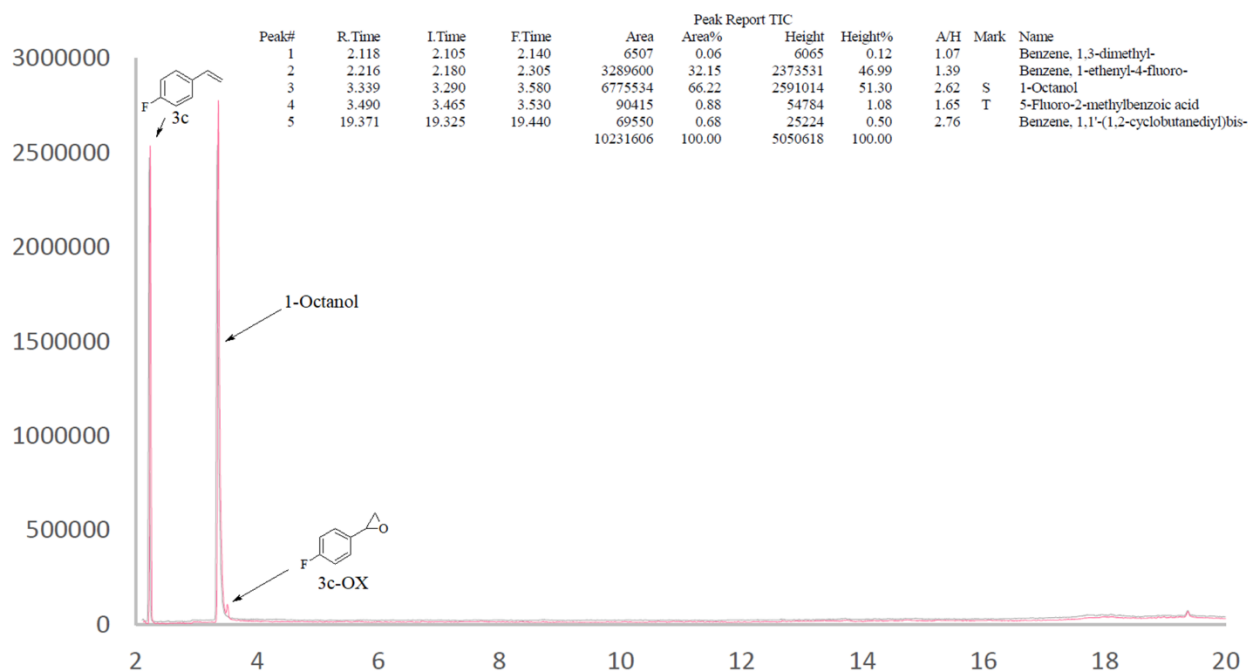

GC-MS analysis of 4-fluorostyrene (**3c**) conversion employing wild type PmlABCDEF.

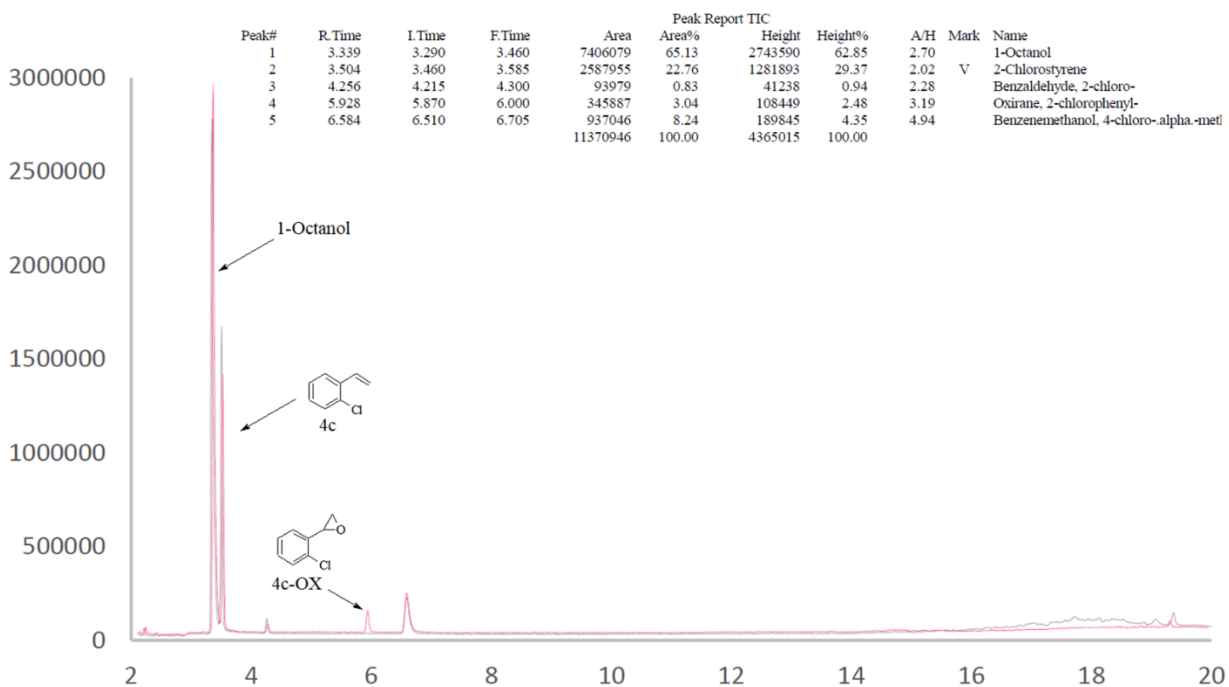

GC-MS analysis of 2-chlorostyrene (**4c**) conversion employing wild type PmlABCDEF.



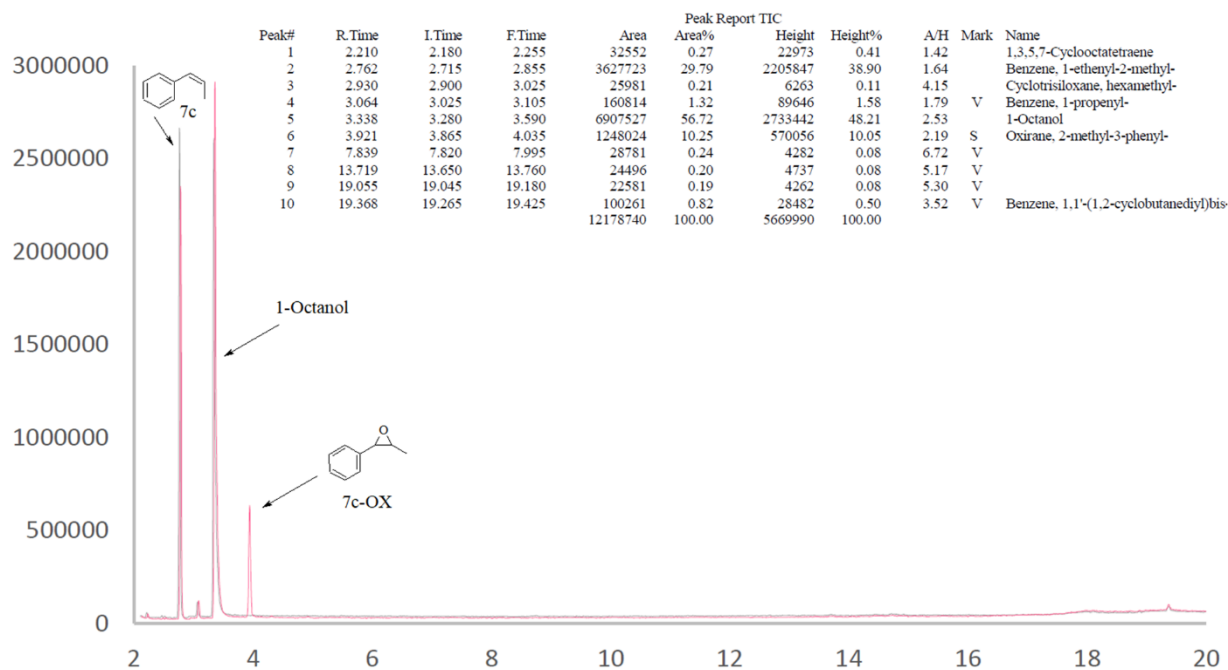

GC-MS analysis of *cis*- $\beta$ -methylstyrene (**7c**) conversion employing wild type PmIABCDEF.

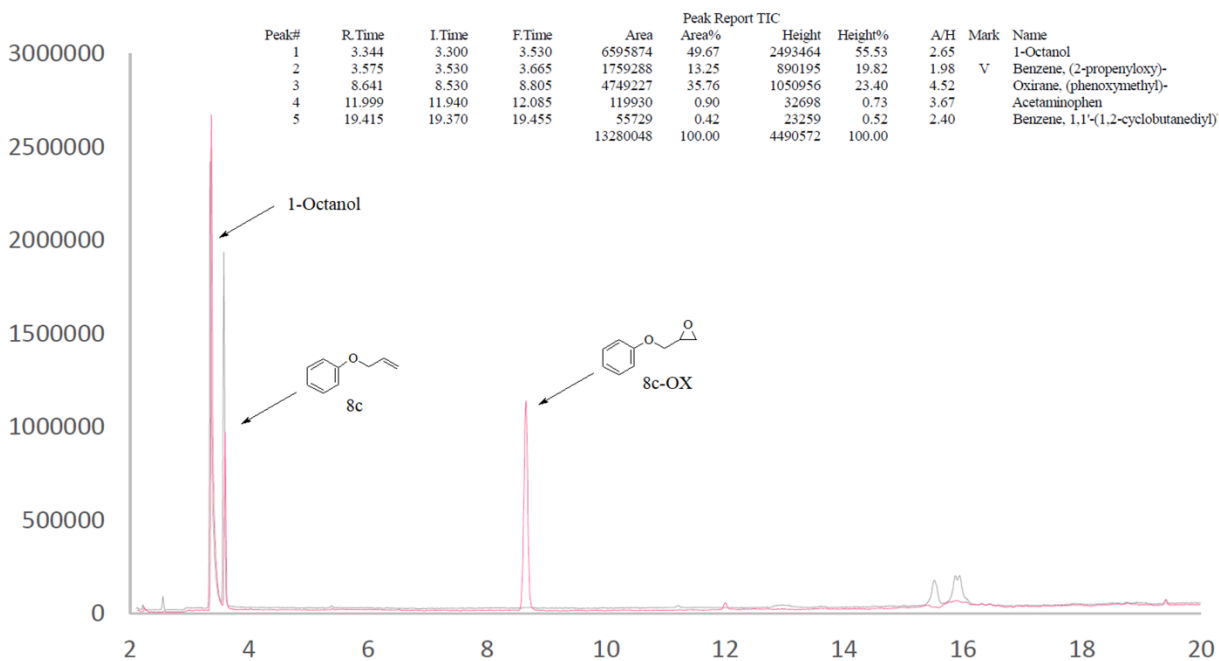

GC-MS analysis of allyl phenyl ether (**8c**) conversion employing wild type PmIABCDEF.

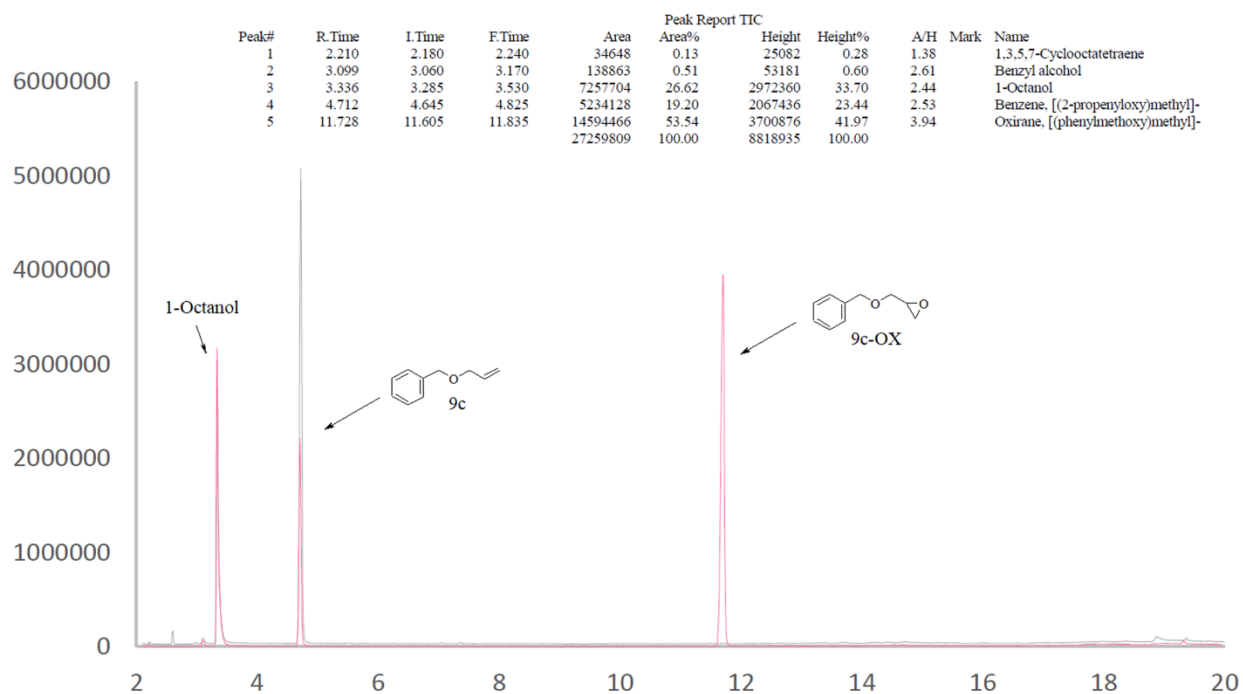

GC-MS analysis of allyl benzyl ether (**9c**) conversion employing wild type PmlABCDEF.

## NMR spectra of synthesized compounds

3-Cyanopyridine-1-oxide (**9a-1-NO**) was prepared according to the general biocatalysis procedure. The crude product was purified by flash chromatography on silica gel ( $\text{CHCl}_3$  :  $\text{CH}_3\text{OH}$ ; 5 : 1) to give a white solid.  $^1\text{H}$  NMR (400 MHz,  $\text{DMSO-d}_6$ ):  $\delta$  = 7.60 (t,  $J$  = 7.3 Hz, 1H, CH), 7.82 (d,  $J$  = 7.9 Hz, 1H, CH), 8.49 (d,  $J$  = 7.8 Hz, 1H, CH), 8.87 (d,  $J$  = 1.7 Hz, 1H, CH).  $^{13}\text{C}$  NMR (101 MHz,  $\text{DMSO-d}_6$ ):  $\delta$  = 112.43, 115.35, 127.86, 128.7, 142.01, 143.64.

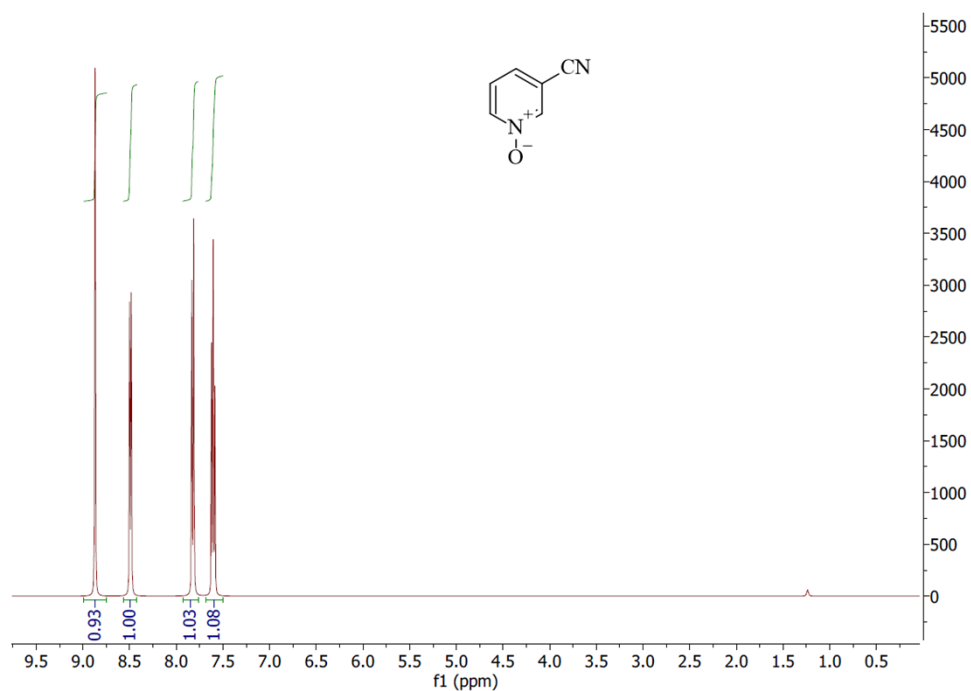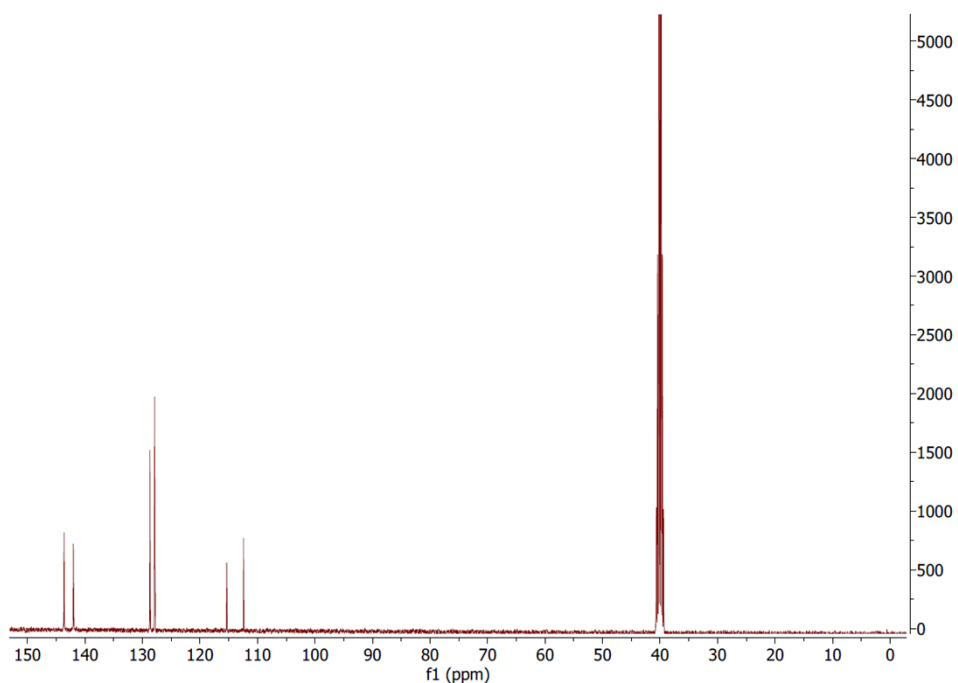

3-Chlorocatechol (**1e-OH**) was prepared according to the general biocatalysis procedure. The crude product was purified by flash chromatography on silica gel ( $\text{CHCl}_3$  :  $\text{CH}_3\text{OH}$ ; 5 : 1) to give a brown solid.  $^1\text{H}$  NMR (400 MHz,  $\text{DMSO-d}_6$ ):  $\delta$  = 6.57 – 6.66 (m, 1H, CH), 6.69 – 6.81 (m, 2H, CH), 9.03 (br. s, 1H, OH), 9.66 (br. s, 1H, OH).  $^{13}\text{C}$  NMR (101 MHz,  $\text{DMSO-d}_6$ ):  $\delta$  = 114.52, 119.90, 120.33, 120.75, 142.35, 147.22.

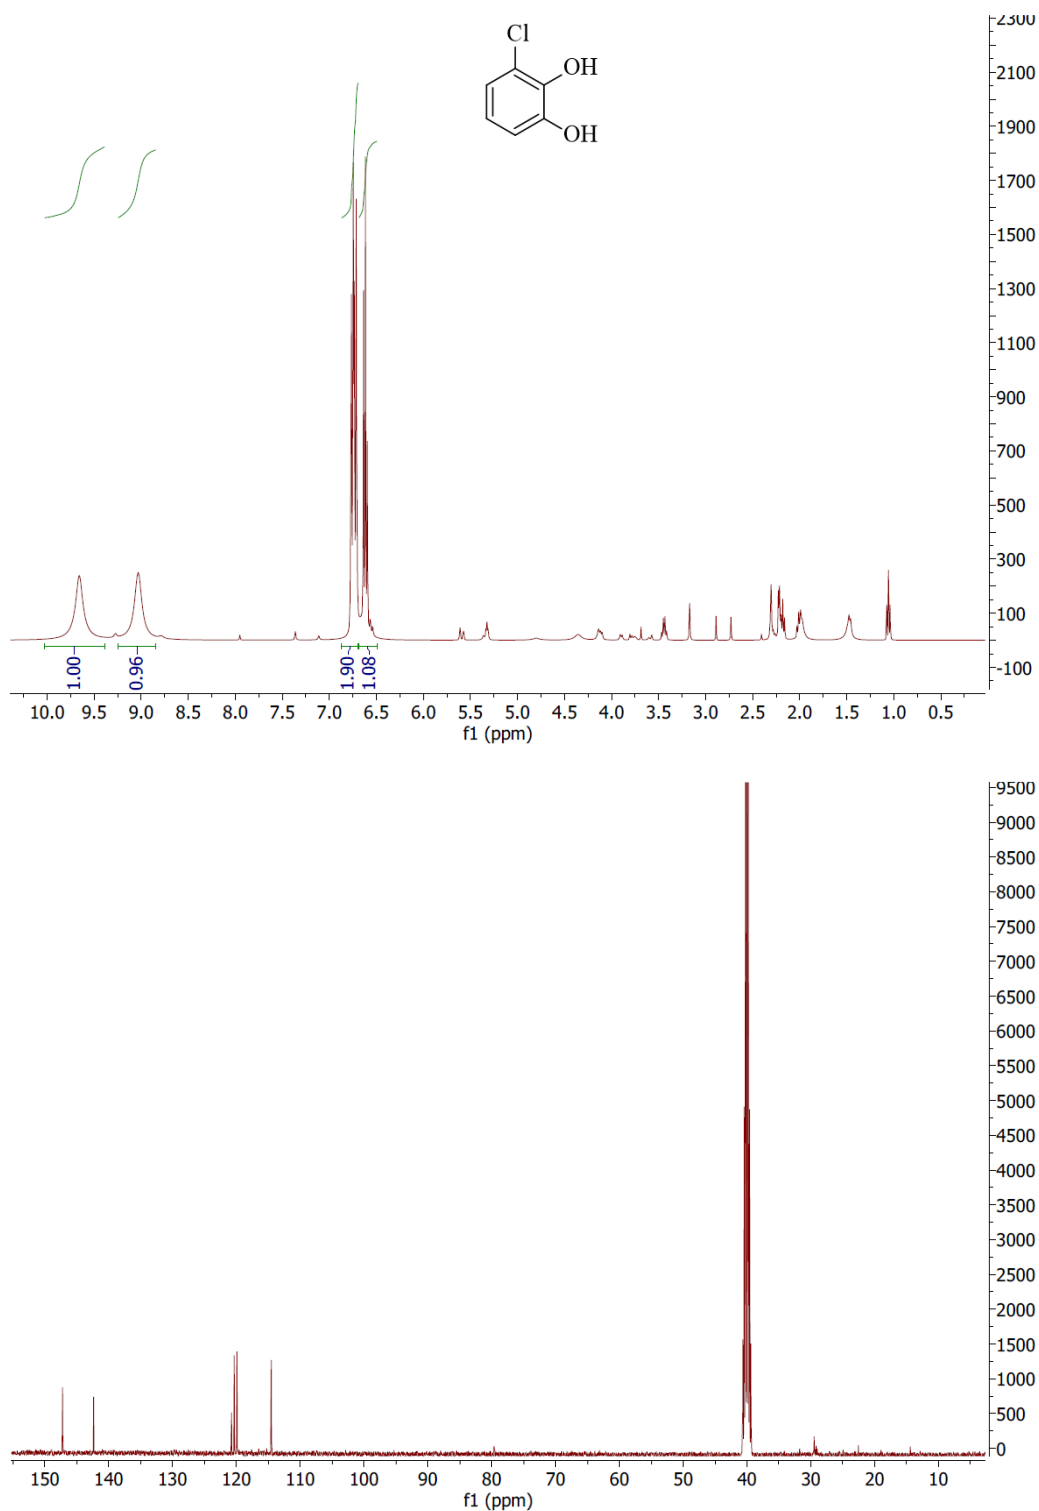

Phenyl glycidyl ether (**8c-OX**) was prepared according to the general biocatalysis procedure. The crude product was purified by flash chromatography on silica gel (n-hexane : EtOAc; 9 : 1) to give a colourless oily liquid.  $^1\text{H}$  NMR (400 MHz, DMSO- $d_6$ ):  $\delta$  = 2.71 (dd,  $J$  = 5.1, 2.7 Hz, 1H, CH), 2.84 (dd,  $J$  = 5.1, 4.2 Hz, 1H, CH), 3.24 – 3.42 (m, 1H, CH), 3.82 (dd,  $J$  = 11.3, 6.5 Hz, 1H, CH), 4.31 (dd,  $J$  = 11.3, 2.7 Hz, 1H, CH), 7.08 – 6.83 (m, 3H, CH), 7.44 – 7.20 (m, 2H, CH).  $^{13}\text{C}$  NMR (101 MHz, DMSO- $d_6$ ):  $\delta$  = 44.24, 50.19, 69.28, 114.96, 121.31, 129.98, 158.70.

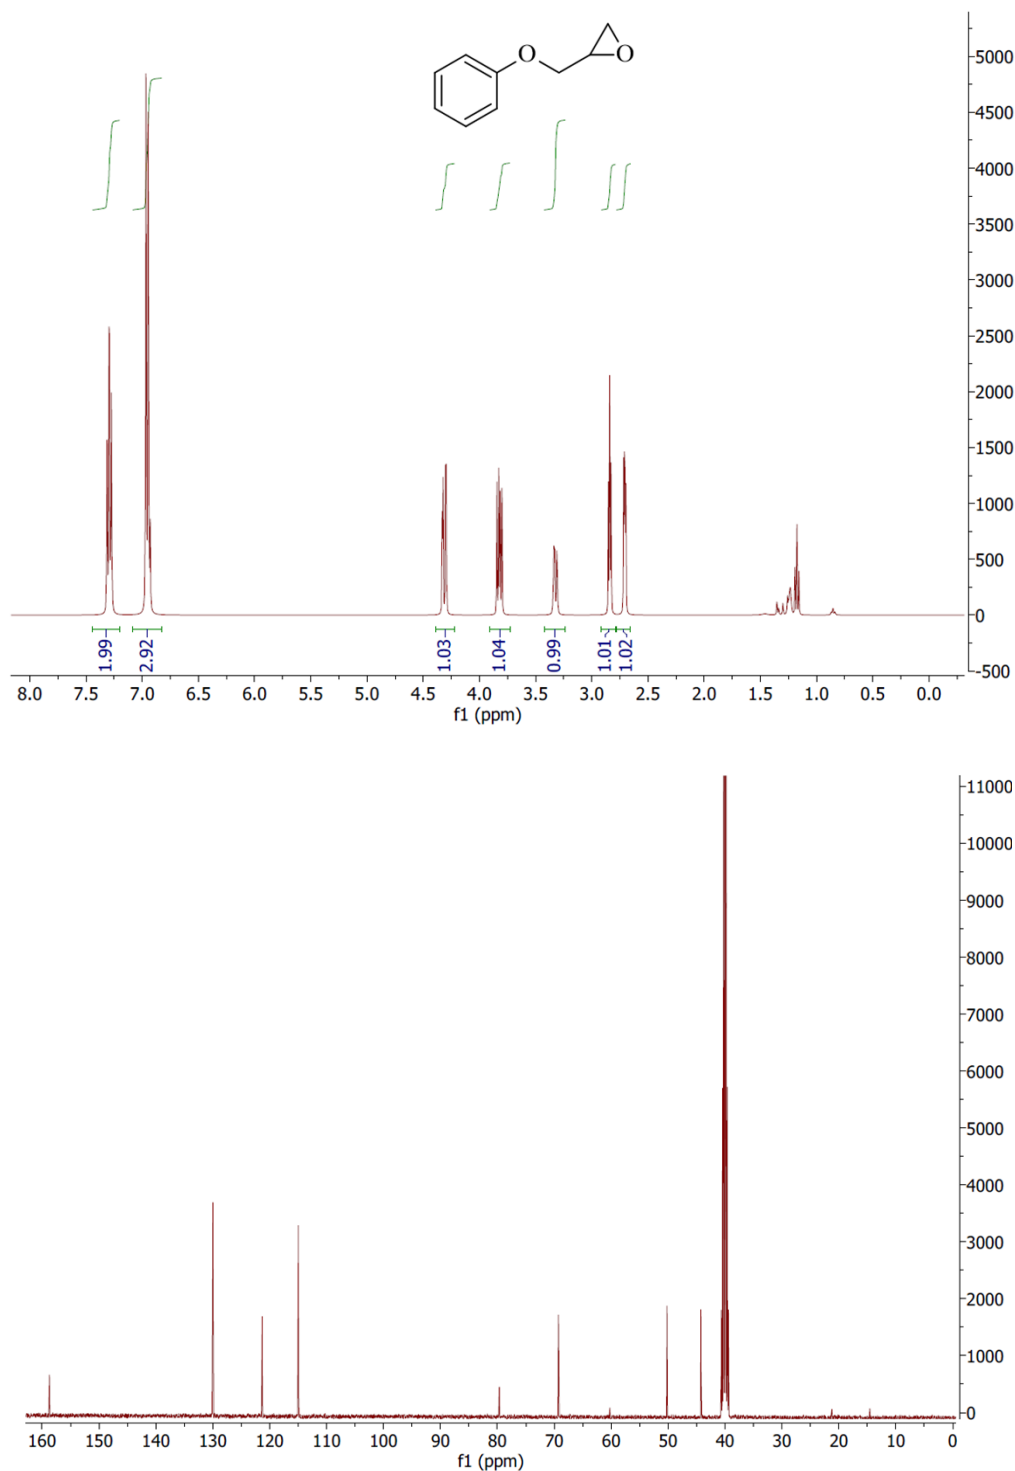

Benzyl glycidyl ether (**9c-*OX***) was prepared according to the general biocatalysis procedure. The crude product was purified by flash chromatography on silica gel (n-hexane : EtOAc; 9 : 1) to give a colourless oily liquid.  $^1\text{H}$  NMR (400 MHz, DMSO- $d_6$ ):  $\delta$  = 2.56 (dd,  $J$  = 5.2, 2.7 Hz, 1H, CH), 2.73 (t,  $J$  = 4.7 Hz, 1H, CH), 3.07 – 3.21 (m, 1H, CH), 3.30 (dd,  $J$  = 11.5, 6.4 Hz, 1H, CH), 3.75 (dd,  $J$  = 11.5, 2.7 Hz, 1H, CH), 4.52 (s, 2H, CH), 7.26 – 7.39 (m, 5H, CH).  $^{13}\text{C}$  NMR (101 MHz, DMSO- $d_6$ ):  $\delta$  = 43.88, 50.76, 71.27, 72.62, 127.95, 128.00, 128.73, 138.68.

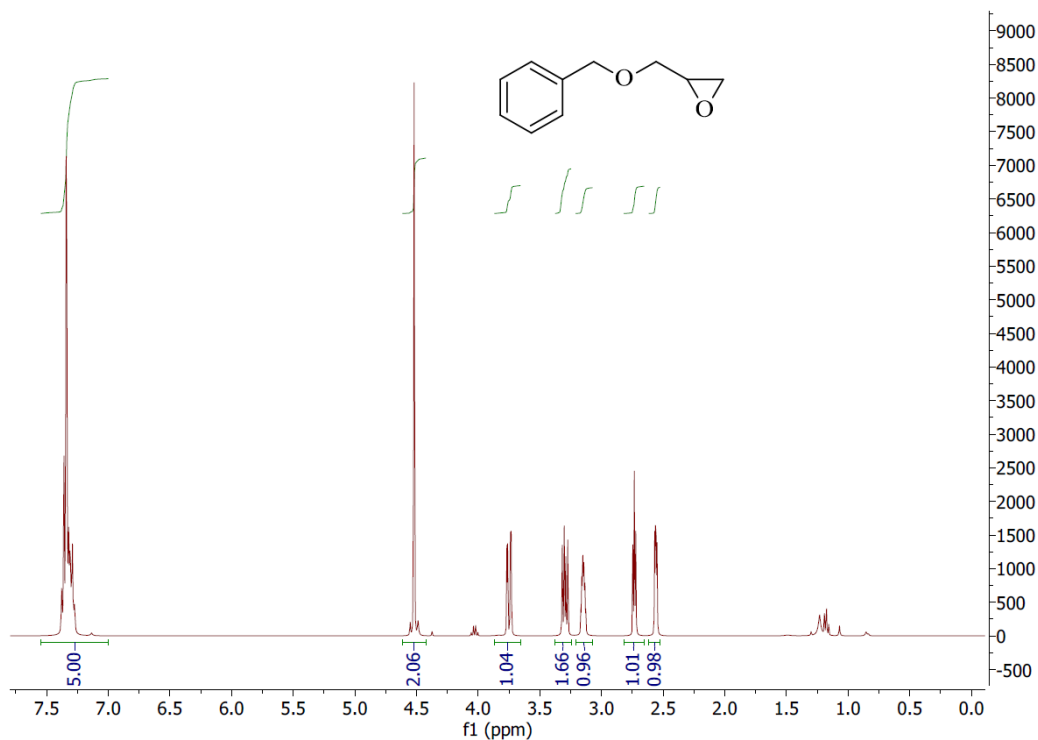

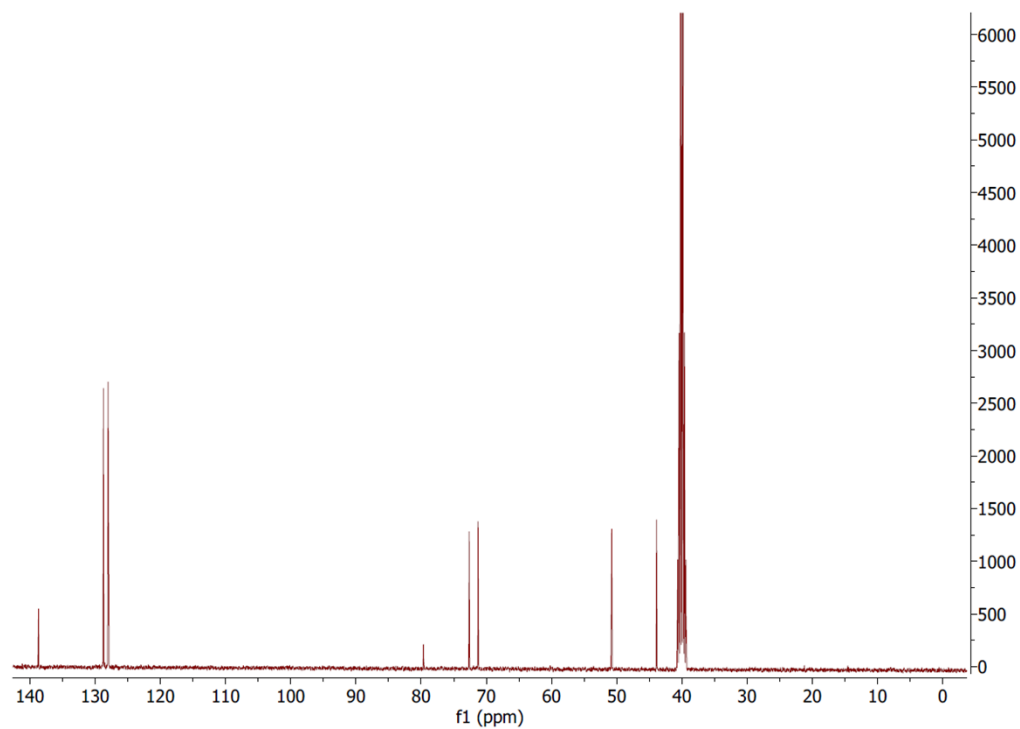

### TLC analysis of regioselective *N*-oxide synthesis

End products of the oxygenation reactions i) using *m*CPBA ii) WT Pml biocatalysis iii) A113G Pml biocatalysis were visualized on TLC for a better presentation. The exact structures of analysed compounds have been described in our previous study.

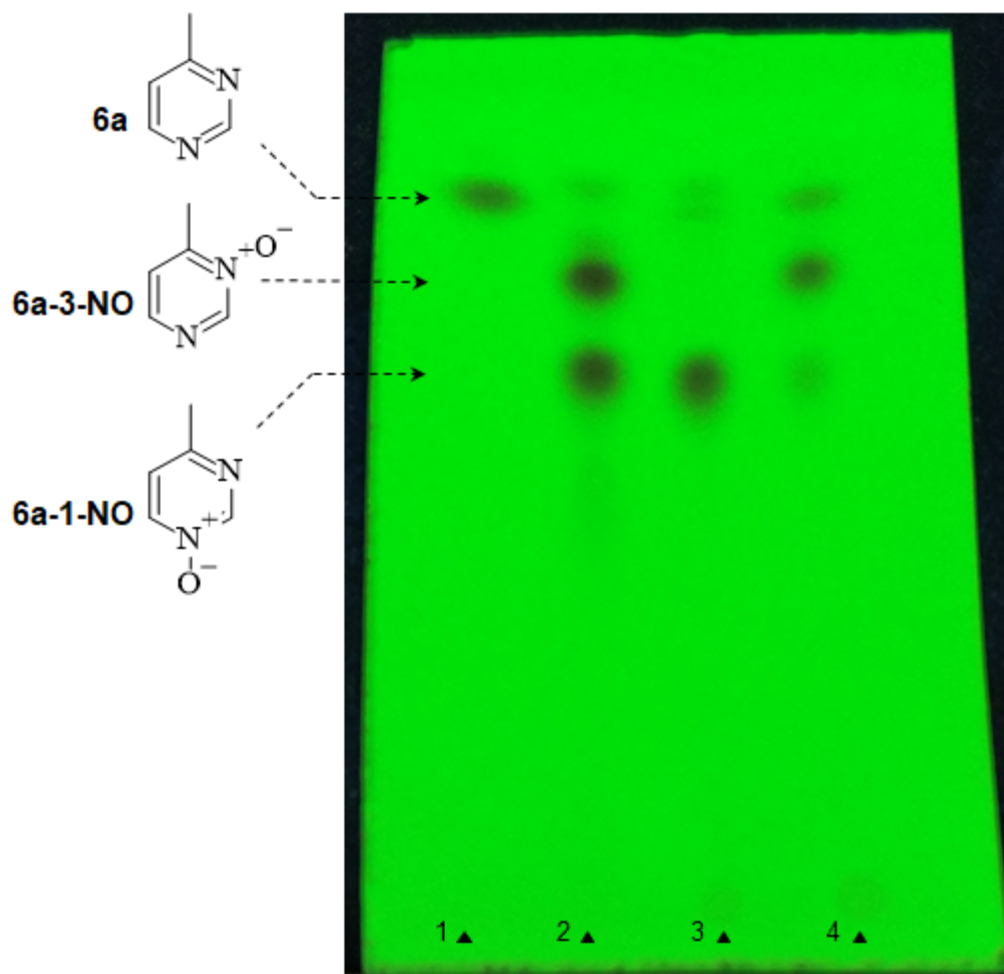

**Fig. S1** TLC analysis of reaction mixtures for 4-methylpyrimidine (**6a**). The analysis was performed applying TLC Silica gel 60 F<sub>254</sub> aluminium sheets from Merck, eluent system CHCl<sub>3</sub>-MeOH (5:1). Lane 1 indicates control (starting compound), lane 2 – oxidation with *m*CPBA, lane 3 – biocatalysis with wild type PmlABCDEF, lane 4 – biocatalysis with PmlD A113G variant of PmlABCDEF.



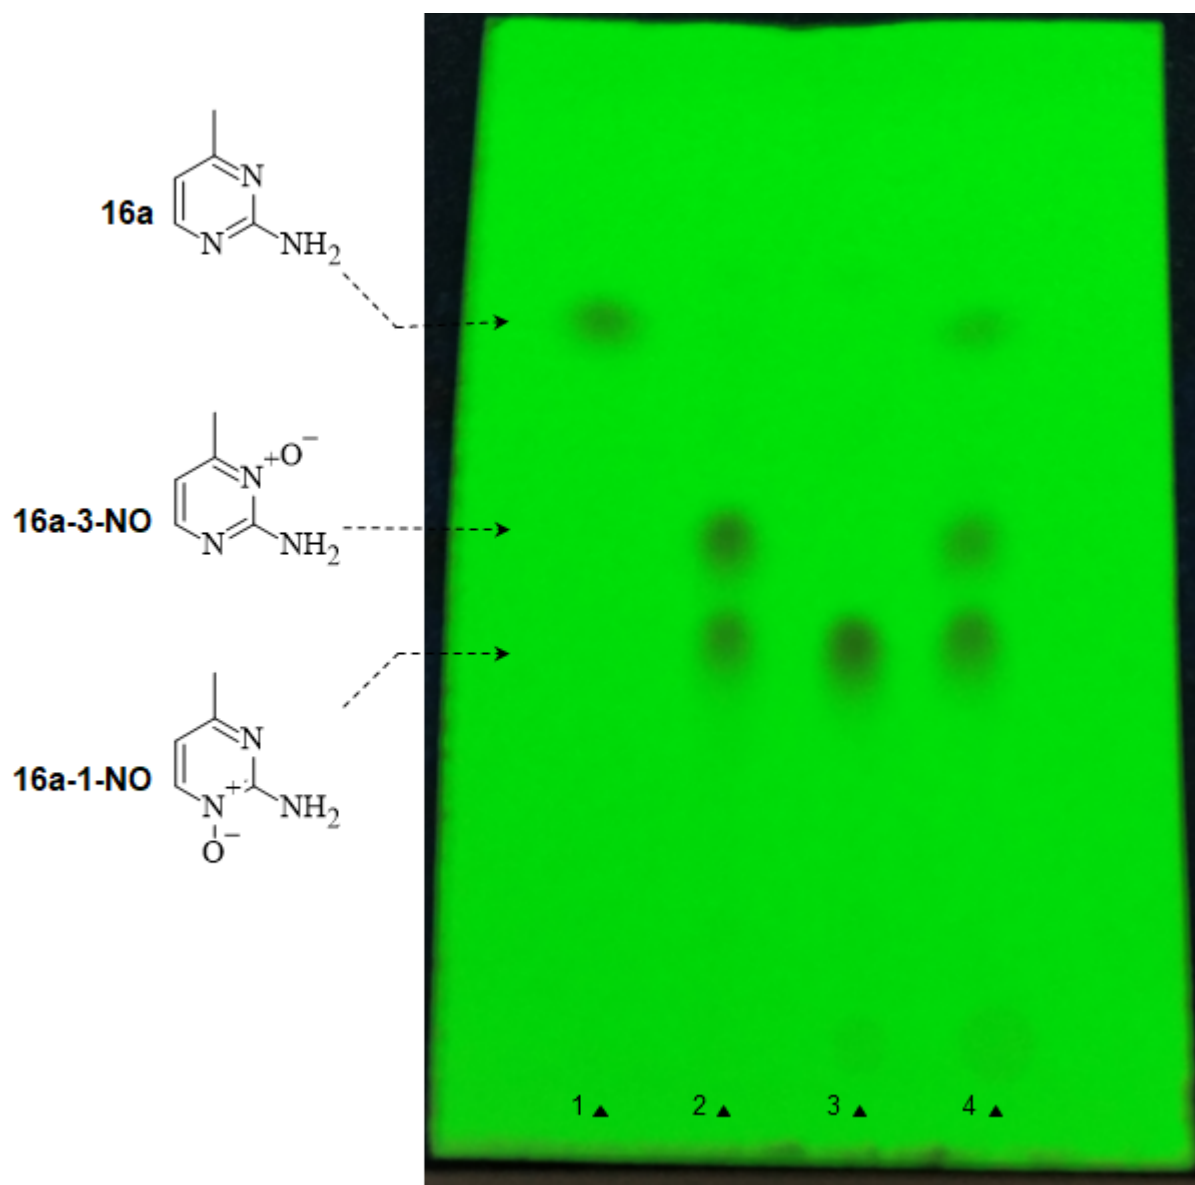

**Fig. S2** TLC analysis of reaction mixtures for 2-amino-4-methylpyrimidine (**16a**). The analysis was performed applying TLC Silica gel 60 F<sub>254</sub> aluminium sheets from Merck, eluent system CHCl<sub>3</sub>-MeOH (5:1). Lane 1 indicates control (starting compound), lane 2 – oxidation with *m*CPBA, lane 3 – biocatalysis with wild type PmlABCDEF, lane 4 – biocatalysis with PmlD A113G variant of PmlABCDEF.

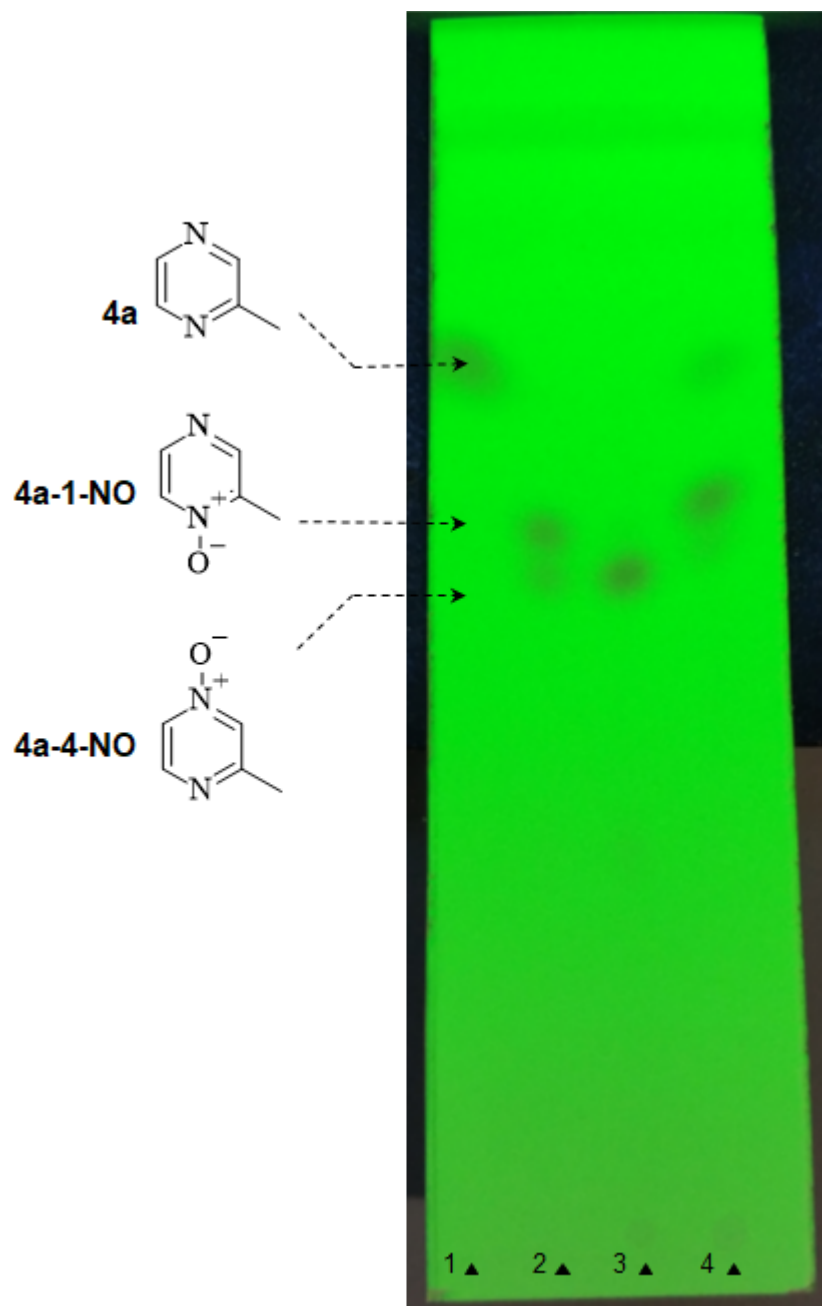

**Fig. S3** TLC analysis of reaction mixtures for 2-methylpyrazine (**4a**). The analysis was performed applying TLC Silica gel 60 F<sub>254</sub> aluminium sheets from Merck, eluent system CHCl<sub>3</sub>-MeOH (9:1). Lane 1 indicates control (starting compound), lane 2 – oxidation with *m*CPBA, lane 3 – biocatalysis with wild type PmlABCDEF, lane 4 – biocatalysis with PmlD A113G variant of PmlABCDEF.
